# Supplementary material for: Extensive impact of low-frequency variants on the phenotypic landscape at population-scale
Source: eLife. 2019 Oct 24;8:e49258. doi: 10.7554/eLife.49258 (PMC6892612; doi:10.7554/eLife.49258)
Supplement: Figure 1—source data 1. — Each value for a given hybrid is the median of 6 replicates. Each value for the haploid parental strains ‘control.a’ and ‘control.b’ are the median of 54 replicates. [file elife-49258-fig1-data1.xlsx]

## Sheet: Feuil1
condition	Id	Name_a	Name_b	growth.ratio
14Deg	control.a	1560		0.19047976011994
14Deg	control.a	2162		0.113565798901361
14Deg	control.a	2187		0.173913043478261
14Deg	control.a	BJ20		0.120240963855422
14Deg	control.a	CECT10109		0.25
14Deg	control.a	CLIB1410		0.137012012012012
14Deg	control.a	CLIB154		0.269230769230769
14Deg	control.a	CLIB382		0
14Deg	control.a	CLIB413		0.137931034482759
14Deg	control.a	CLIB485		0.285714285714286
14Deg	control.a	CLQCA_04-021		0.243714644877436
14Deg	control.a	CLQCA_10-027		0.153846153846154
14Deg	control.a	CLQCA_20-184		0.150199975003124
14Deg	control.a	CLQCA_20-246		0.176944971537002
14Deg	control.a	CLQCA_20-259		0.10314558629776
14Deg	control.a	DBVPG1058		0.533333333333333
14Deg	control.a	DBVPG1564		0.160398585663774
14Deg	control.a	DBVPG2088		0.267948717948718
14Deg	control.a	DBVPG3591		0.248456790123457
14Deg	control.a	ES4M07		0.123076923076923
14Deg	control.a	EXF-5247		0.212310606060606
14Deg	control.a	EXF-5248		0.211538461538462
14Deg	control.a	EXF-5295		0.354552780016116
14Deg	control.a	EXF-5297		0.267145505097312
14Deg	control.a	EXF-7197		0.238047052871237
14Deg	control.a	FY		0.20995115995116
14Deg	control.a	HN15		0.0951851263308438
14Deg	control.a	HN16		0.151079136690647
14Deg	control.a	I14		0.120481927710843
14Deg	control.a	L-1374		0.227790880503145
14Deg	control.a	NC-02		0.251373626373626
14Deg	control.a	NPA03.1		0.0558816183816184
14Deg	control.a	CLIB1071		0.230696127346163
14Deg	control.a	HN10		0.154639175257732
14Deg	control.a	S1278b		0.124038461538462
14Deg	control.a	Sample_40		0.112765535040699
14Deg	control.a	T7		0.179711246200608
14Deg	control.a	UC8		0.180461329715061
14Deg	control.a	UCD_05-780		0.229166666666667
14Deg	control.a	UCD_09-448		0.219818990642737
14Deg	control.a	WE372_1		0.181818181818182
14Deg	control.a	Y12		0.209109730848862
14Deg	control.a	YJM326		0.303534571723426
14Deg	control.a	YJM421		0.313508064516129
14Deg	control.a	YJM434		0.16
14Deg	control.a	YJM627		0.183006535947712
14Deg	control.a	YJM990		0.330845771144279
14Deg	control.a	YPS133		0.132153438328396
14Deg	control.a	YPS141		0.138196286472148
14Deg	control.a	YPS142		0.129032258064516
14Deg	control.a	YPS143		0.147164987216123
14Deg	control.a	YPS163		0.136363636363636
14Deg	control.a	YPS615		0.149298017079172
14Deg	control.a	YPS617		0.162040510127532
14Deg	control.a	ZP_611		0.177787532923617
14Deg	control.b	1560		0.217606543263022
14Deg	control.b	2162		0.112086187214612
14Deg	control.b	2187		0.205128205128205
14Deg	control.b	BJ20		0.119646904449481
14Deg	control.b	CECT10109		0.269446845289542
14Deg	control.b	CLIB1410		0
14Deg	control.b	CLIB154		0.329030646235843
14Deg	control.b	CLIB382		0
14Deg	control.b	CLIB413		0.206896551724138
14Deg	control.b	CLIB485		0.216374269005848
14Deg	control.b	CLQCA_04-021		0.228788915497777
14Deg	control.b	CLQCA_10-027		0.148700939745716
14Deg	control.b	CLQCA_20-184		0.148333333333333
14Deg	control.b	CLQCA_20-246		0.110392082223068
14Deg	control.b	CLQCA_20-259		0.0945945945945946
14Deg	control.b	DBVPG1058		0.216216216216216
14Deg	control.b	DBVPG1564		0.120499419279907
14Deg	control.b	DBVPG2088		0.264536849222448
14Deg	control.b	DBVPG3591		0.261684782608696
14Deg	control.b	ES4M07		0.0932423651721897
14Deg	control.b	EXF-5247		0.207107843137254
14Deg	control.b	EXF-5248		0.214774774774775
14Deg	control.b	EXF-5295		0.265277777777778
14Deg	control.b	EXF-5297		0.246833413500081
14Deg	control.b	EXF-7197		0.186342592592593
14Deg	control.b	FY		0.22524154589372
14Deg	control.b	HN15		0.100955414012739
14Deg	control.b	HN16		0.103479036574487
14Deg	control.b	I14		0.148148148148148
14Deg	control.b	L-1374		0.282141921969102
14Deg	control.b	NC-02		0.353767942583732
14Deg	control.b	NPA03.1		0.0581395348837209
14Deg	control.b	CLIB1071		0.139767441860465
14Deg	control.b	HN10		0.148936170212766
14Deg	control.b	S1278b		0.121239954075775
14Deg	control.b	Sample_40		0.162474226804124
14Deg	control.b	T7		0.188118811881188
14Deg	control.b	UC8		0.183216783216783
14Deg	control.b	UCD_05-780		0.176242236024845
14Deg	control.b	UCD_09-448		0.210706266585018
14Deg	control.b	WE372_1		0.180712858094604
14Deg	control.b	Y12		0.245255997135696
14Deg	control.b	YJM326		0.310101991257892
14Deg	control.b	YJM421		0.247422680412371
14Deg	control.b	YJM434		0.175438596491228
14Deg	control.b	YJM627		0.163041765169425
14Deg	control.b	YJM990		0.285502283105022
14Deg	control.b	YPS133		0.0952380952380952
14Deg	control.b	YPS141		0.101914962674457
14Deg	control.b	YPS142		0.139211886304909
14Deg	control.b	YPS143		0.103021370670597
14Deg	control.b	YPS163		0.145502645502646
14Deg	control.b	YPS615		0.148044253355704
14Deg	control.b	YPS617		0.149404761904762
14Deg	control.b	ZP_611		0.172894021739131
14Deg	hybrid	1560	1560	0.340895941813373
14Deg	hybrid	1560	2162	0.318761704119851
14Deg	hybrid	1560	2187	0.396341463414634
14Deg	hybrid	1560	BJ20	0.213913392141139
14Deg	hybrid	1560	CECT10109	0.404225352112676
14Deg	hybrid	1560	CLIB1410	0.388591366439468
14Deg	hybrid	1560	CLIB154	0.447678447678448
14Deg	hybrid	1560	CLIB382	0.304126984126984
14Deg	hybrid	1560	CLIB413	0.350851063829787
14Deg	hybrid	1560	CLIB485	0.403413217138708
14Deg	hybrid	1560	CLQCA_04-021	0.366703744901743
14Deg	hybrid	1560	CLQCA_10-027	0.270166453265045
14Deg	hybrid	1560	CLQCA_20-184	0.327421171171171
14Deg	hybrid	1560	CLQCA_20-246	0.224172374429224
14Deg	hybrid	1560	CLQCA_20-259	0.158500878391568
14Deg	hybrid	1560	DBVPG1058	0.405060728744939
14Deg	hybrid	1560	DBVPG1564	0.384631549453629
14Deg	hybrid	1560	DBVPG2088	0.4222334682861
14Deg	hybrid	1560	DBVPG3591	0.43125
14Deg	hybrid	1560	ES4M07	0.220115356885364
14Deg	hybrid	1560	EXF-5247	0.392652815417043
14Deg	hybrid	1560	EXF-5248	0.431224899598393
14Deg	hybrid	1560	EXF-5295	0.412136350279165
14Deg	hybrid	1560	EXF-5297	0.424184543050249
14Deg	hybrid	1560	EXF-7197	0.392467948717949
14Deg	hybrid	1560	FY	0.237597751710655
14Deg	hybrid	1560	HN15	0.227702479338843
14Deg	hybrid	1560	HN16	0.239093898428937
14Deg	hybrid	1560	I14	0.366600790513834
14Deg	hybrid	1560	L-1374	0.373496873496874
14Deg	hybrid	1560	NC-02	0.428513071895425
14Deg	hybrid	1560	NPA03.1	0.246262861580276
14Deg	hybrid	1560	CLIB1071	0.336879432624114
14Deg	hybrid	1560	HN10	0.325670717725293
14Deg	hybrid	1560	S1278b	0.363591852722288
14Deg	hybrid	1560	Sample_40	0.365897244973939
14Deg	hybrid	1560	T7	0.335205992509363
14Deg	hybrid	1560	UC8	0.400014692918013
14Deg	hybrid	1560	UCD_05-780	0.372522214627478
14Deg	hybrid	1560	UCD_09-448	0.288784584980237
14Deg	hybrid	1560	WE372_1	0.428599425137183
14Deg	hybrid	1560	Y12	0.359068885611965
14Deg	hybrid	1560	YJM326	0.539722572509457
14Deg	hybrid	1560	YJM421	0.405667366341524
14Deg	hybrid	1560	YJM434	0.356767676767677
14Deg	hybrid	1560	YJM627	0.255811602991713
14Deg	hybrid	1560	YJM990	0.388138528138529
14Deg	hybrid	1560	YPS133	0.312749750249751
14Deg	hybrid	1560	YPS141	0.350627891606081
14Deg	hybrid	1560	YPS142	0.3696738172201
14Deg	hybrid	1560	YPS143	0.327088948787062
14Deg	hybrid	1560	YPS163	0.339285714285714
14Deg	hybrid	1560	YPS615	0.327571733821734
14Deg	hybrid	1560	YPS617	0.322033898305085
14Deg	hybrid	1560	ZP_611	0.25513698630137
14Deg	hybrid	2162	1560	0.248855101666972
14Deg	hybrid	2162	2162	0.24234693877551
14Deg	hybrid	2162	2187	0.222898409607271
14Deg	hybrid	2162	BJ20	0.152961129446278
14Deg	hybrid	2162	CECT10109	0.252585965893207
14Deg	hybrid	2162	CLIB1410	0.357919254658385
14Deg	hybrid	2162	CLIB154	0.302345261121857
14Deg	hybrid	2162	CLIB382	0.191107742831881
14Deg	hybrid	2162	CLIB413	0.265967773247913
14Deg	hybrid	2162	CLIB485	0.368456078083407
14Deg	hybrid	2162	CLQCA_04-021	0.281746031746032
14Deg	hybrid	2162	CLQCA_10-027	0.18065268065268
14Deg	hybrid	2162	CLQCA_20-184	0.239558023834317
14Deg	hybrid	2162	CLQCA_20-246	0.191818796484111
14Deg	hybrid	2162	CLQCA_20-259	0.124038461538462
14Deg	hybrid	2162	DBVPG1058	0.329411764705882
14Deg	hybrid	2162	DBVPG1564	0.367158327109783
14Deg	hybrid	2162	DBVPG2088	0.31953781512605
14Deg	hybrid	2162	DBVPG3591	0.343892137751787
14Deg	hybrid	2162	ES4M07	0.135509781059723
14Deg	hybrid	2162	EXF-5247	0.323570142639524
14Deg	hybrid	2162	EXF-5248	0.340896921017403
14Deg	hybrid	2162	EXF-5295	0.36576055523424
14Deg	hybrid	2162	EXF-5297	0.345401382243487
14Deg	hybrid	2162	EXF-7197	0.226344936708861
14Deg	hybrid	2162	FY	0.185690953633972
14Deg	hybrid	2162	HN15	0.134679461548714
14Deg	hybrid	2162	HN16	0.1375
14Deg	hybrid	2162	I14	0.271514161220044
14Deg	hybrid	2162	L-1374	0.340953118946145
14Deg	hybrid	2162	NC-02	0.386735419630157
14Deg	hybrid	2162	NPA03.1	0.13145829659672
14Deg	hybrid	2162	CLIB1071	0.217669172932331
14Deg	hybrid	2162	HN10	0.222826086956522
14Deg	hybrid	2162	S1278b	0.274193548387097
14Deg	hybrid	2162	Sample_40	0.257389162561577
14Deg	hybrid	2162	T7	0.254030288226673
14Deg	hybrid	2162	UC8	0.304320987654321
14Deg	hybrid	2162	UCD_05-780	0.238377098579424
14Deg	hybrid	2162	UCD_09-448	0.227629513343799
14Deg	hybrid	2162	WE372_1	0.292857142857143
14Deg	hybrid	2162	Y12	0.38989898989899
14Deg	hybrid	2162	YJM326	0.427769318614389
14Deg	hybrid	2162	YJM421	0.329059829059829
14Deg	hybrid	2162	YJM434	0.328510082150859
14Deg	hybrid	2162	YJM627	0.210762742940961
14Deg	hybrid	2162	YJM990	0.370078258742969
14Deg	hybrid	2162	YPS133	0.183594844494256
14Deg	hybrid	2162	YPS141	0.216867469879518
14Deg	hybrid	2162	YPS142	0.247058823529412
14Deg	hybrid	2162	YPS143	0.210255066387142
14Deg	hybrid	2162	YPS163	0.238677988677989
14Deg	hybrid	2162	YPS615	0.200063478628862
14Deg	hybrid	2162	YPS617	0.191613209788549
14Deg	hybrid	2162	ZP_611	0.197701149425288
14Deg	hybrid	2187	1560	0.287243886318572
14Deg	hybrid	2187	2162	0.274146341463415
14Deg	hybrid	2187	2187	0.3625
14Deg	hybrid	2187	BJ20	0.22386717813474
14Deg	hybrid	2187	CECT10109	0.407265144863915
14Deg	hybrid	2187	CLIB1410	0.382570295602019
14Deg	hybrid	2187	CLIB154	0.382448537378115
14Deg	hybrid	2187	CLIB382	0.289010989010989
14Deg	hybrid	2187	CLIB413	0.326423200859291
14Deg	hybrid	2187	CLIB485	0.392336059002726
14Deg	hybrid	2187	CLQCA_04-021	0.322365165759525
14Deg	hybrid	2187	CLQCA_10-027	0.320056899004268
14Deg	hybrid	2187	CLQCA_20-184	0.265564738292011
14Deg	hybrid	2187	CLQCA_20-246	0.230185758513932
14Deg	hybrid	2187	CLQCA_20-259	0.17814845704754
14Deg	hybrid	2187	DBVPG1058	0.392361111111111
14Deg	hybrid	2187	DBVPG1564	0.381552182757002
14Deg	hybrid	2187	DBVPG2088	0.386363636363636
14Deg	hybrid	2187	DBVPG3591	0.440606653620353
14Deg	hybrid	2187	ES4M07	0.238068181818182
14Deg	hybrid	2187	EXF-5247	0.347803425167535
14Deg	hybrid	2187	EXF-5248	0.351470588235294
14Deg	hybrid	2187	EXF-5295	0.367538126361656
14Deg	hybrid	2187	EXF-5297	0.388289036544851
14Deg	hybrid	2187	EXF-7197	0.343881856540084
14Deg	hybrid	2187	FY	0.238856648969009
14Deg	hybrid	2187	HN15	0.178373266078185
14Deg	hybrid	2187	HN16	0.198379902925358
14Deg	hybrid	2187	I14	0.290584415584416
14Deg	hybrid	2187	L-1374	0.395121951219512
14Deg	hybrid	2187	NC-02	0.447121034077555
14Deg	hybrid	2187	NPA03.1	0.218419661733615
14Deg	hybrid	2187	CLIB1071	0.310385835095138
14Deg	hybrid	2187	HN10	0.318222911016402
14Deg	hybrid	2187	S1278b	0.342857142857143
14Deg	hybrid	2187	Sample_40	0.361305361305362
14Deg	hybrid	2187	T7	0.346832397754612
14Deg	hybrid	2187	UC8	0.338709677419355
14Deg	hybrid	2187	UCD_05-780	0.368718238283456
14Deg	hybrid	2187	UCD_09-448	0.312857573020175
14Deg	hybrid	2187	WE372_1	0.406650071123755
14Deg	hybrid	2187	Y12	0.345186559472274
14Deg	hybrid	2187	YJM326	0.447714604236344
14Deg	hybrid	2187	YJM421	0.315953654188948
14Deg	hybrid	2187	YJM434	0.352189074002325
14Deg	hybrid	2187	YJM627	0.216338259441708
14Deg	hybrid	2187	YJM990	0.364081472777125
14Deg	hybrid	2187	YPS133	0.335497835497836
14Deg	hybrid	2187	YPS141	0.34875
14Deg	hybrid	2187	YPS142	0.379330034259612
14Deg	hybrid	2187	YPS143	0.303215579710145
14Deg	hybrid	2187	YPS163	0.346153846153846
14Deg	hybrid	2187	YPS615	0.249
14Deg	hybrid	2187	YPS617	0.245882843443819
14Deg	hybrid	2187	ZP_611	0.312173913043479
14Deg	hybrid	BJ20	1560	0.26624649859944
14Deg	hybrid	BJ20	2162	0.263136288998358
14Deg	hybrid	BJ20	2187	0.320232399179768
14Deg	hybrid	BJ20	BJ20	0.23176424820074
14Deg	hybrid	BJ20	CECT10109	0.320778917910448
14Deg	hybrid	BJ20	CLIB1410	0.417668751002085
14Deg	hybrid	BJ20	CLIB154	0.4375
14Deg	hybrid	BJ20	CLIB382	0.275558312655087
14Deg	hybrid	BJ20	CLIB413	0.30737927292458
14Deg	hybrid	BJ20	CLIB485	0.411217948717948
14Deg	hybrid	BJ20	CLQCA_04-021	0.364176829268293
14Deg	hybrid	BJ20	CLQCA_10-027	0.230769230769231
14Deg	hybrid	BJ20	CLQCA_20-184	0.273888888888889
14Deg	hybrid	BJ20	CLQCA_20-246	0.225478468899522
14Deg	hybrid	BJ20	CLQCA_20-259	0.166839409828069
14Deg	hybrid	BJ20	DBVPG1058	0.467204301075269
14Deg	hybrid	BJ20	DBVPG1564	0.36996336996337
14Deg	hybrid	BJ20	DBVPG2088	0.418003565062388
14Deg	hybrid	BJ20	DBVPG3591	0.4
14Deg	hybrid	BJ20	ES4M07	0.204613095238095
14Deg	hybrid	BJ20	EXF-5247	0.362198795180723
14Deg	hybrid	BJ20	EXF-5248	0.374935400516796
14Deg	hybrid	BJ20	EXF-5295	0.366979546091342
14Deg	hybrid	BJ20	EXF-5297	0.361482558139535
14Deg	hybrid	BJ20	EXF-7197	0.358354470513634
14Deg	hybrid	BJ20	FY	0.264232008592911
14Deg	hybrid	BJ20	HN15	0.172209903917221
14Deg	hybrid	BJ20	HN16	0.184804097771388
14Deg	hybrid	BJ20	I14	0.302231237322516
14Deg	hybrid	BJ20	L-1374	0.349089635854341
14Deg	hybrid	BJ20	NC-02	0.404001404001404
14Deg	hybrid	BJ20	NPA03.1	0.21725768321513
14Deg	hybrid	BJ20	CLIB1071	0.307369010927431
14Deg	hybrid	BJ20	HN10	0.246575342465754
14Deg	hybrid	BJ20	S1278b	0.345417451349655
14Deg	hybrid	BJ20	Sample_40	0.320648734177215
14Deg	hybrid	BJ20	T7	0.360210071053444
14Deg	hybrid	BJ20	UC8	0.338296605122097
14Deg	hybrid	BJ20	UCD_05-780	0.306666666666667
14Deg	hybrid	BJ20	UCD_09-448	0.290123456790124
14Deg	hybrid	BJ20	WE372_1	0.43479938271605
14Deg	hybrid	BJ20	Y12	0.343267326732674
14Deg	hybrid	BJ20	YJM326	0.488095238095238
14Deg	hybrid	BJ20	YJM421	0.34632683658171
14Deg	hybrid	BJ20	YJM434	0.329607892107893
14Deg	hybrid	BJ20	YJM627	0.208816425120773
14Deg	hybrid	BJ20	YJM990	0.408531746031746
14Deg	hybrid	BJ20	YPS133	0.239529546758463
14Deg	hybrid	BJ20	YPS141	0.329390537289495
14Deg	hybrid	BJ20	YPS142	0.3
14Deg	hybrid	BJ20	YPS143	0.302173913043479
14Deg	hybrid	BJ20	YPS163	0.296666666666667
14Deg	hybrid	BJ20	YPS615	0.248941798941799
14Deg	hybrid	BJ20	YPS617	0.22682843179285
14Deg	hybrid	BJ20	ZP_611	0.284749034749035
14Deg	hybrid	CECT10109	1560	0.354389861510322
14Deg	hybrid	CECT10109	2162	0.270869565217391
14Deg	hybrid	CECT10109	2187	0.271395689474786
14Deg	hybrid	CECT10109	BJ20	0.241534559289791
14Deg	hybrid	CECT10109	CECT10109	0.393862612612613
14Deg	hybrid	CECT10109	CLIB1410	0.386130136986302
14Deg	hybrid	CECT10109	CLIB154	0.513166144200627
14Deg	hybrid	CECT10109	CLIB382	0.293103448275862
14Deg	hybrid	CECT10109	CLIB413	0.349943930473787
14Deg	hybrid	CECT10109	CLIB485	0.402702702702702
14Deg	hybrid	CECT10109	CLQCA_04-021	0.360389610389611
14Deg	hybrid	CECT10109	CLQCA_10-027	0.325196053630155
14Deg	hybrid	CECT10109	CLQCA_20-184	0.241785930255996
14Deg	hybrid	CECT10109	CLQCA_20-246	0.140625
14Deg	hybrid	CECT10109	CLQCA_20-259	0.229060712015258
14Deg	hybrid	CECT10109	DBVPG1058	0.509433962264151
14Deg	hybrid	CECT10109	DBVPG1564	0.415912518853695
14Deg	hybrid	CECT10109	DBVPG2088	0.356937799043062
14Deg	hybrid	CECT10109	DBVPG3591	0.383996212121212
14Deg	hybrid	CECT10109	ES4M07	0.259222661396575
14Deg	hybrid	CECT10109	EXF-5247	0.223839223839224
14Deg	hybrid	CECT10109	EXF-5248	0.250513538748833
14Deg	hybrid	CECT10109	EXF-5295	0.311398176291793
14Deg	hybrid	CECT10109	EXF-5297	0.34313725490196
14Deg	hybrid	CECT10109	EXF-7197	0.330845771144279
14Deg	hybrid	CECT10109	FY	0.294774124565624
14Deg	hybrid	CECT10109	HN15	0.159304511278196
14Deg	hybrid	CECT10109	HN16	0.185454545454546
14Deg	hybrid	CECT10109	I14	0.380681818181818
14Deg	hybrid	CECT10109	L-1374	0.36125
14Deg	hybrid	CECT10109	NC-02	0.404819277108434
14Deg	hybrid	CECT10109	NPA03.1	0.261681329423265
14Deg	hybrid	CECT10109	CLIB1071	0.197570850202429
14Deg	hybrid	CECT10109	HN10	0.164414414414415
14Deg	hybrid	CECT10109	S1278b	0.480748663101605
14Deg	hybrid	CECT10109	Sample_40	0.291594202898551
14Deg	hybrid	CECT10109	T7	0.28121581497109
14Deg	hybrid	CECT10109	UC8	0.452884615384616
14Deg	hybrid	CECT10109	UCD_05-780	0.198469108802625
14Deg	hybrid	CECT10109	UCD_09-448	0.28630604288499
14Deg	hybrid	CECT10109	WE372_1	0.297540983606558
14Deg	hybrid	CECT10109	Y12	0.330048543689321
14Deg	hybrid	CECT10109	YJM326	0.651515151515152
14Deg	hybrid	CECT10109	YJM421	0.363471177944862
14Deg	hybrid	CECT10109	YJM434	0.46403574087863
14Deg	hybrid	CECT10109	YJM627	0.260984290623466
14Deg	hybrid	CECT10109	YJM990	0.446180555555555
14Deg	hybrid	CECT10109	YPS133	0.194594594594595
14Deg	hybrid	CECT10109	YPS141	0.251755001755002
14Deg	hybrid	CECT10109	YPS142	0.213752913752914
14Deg	hybrid	CECT10109	YPS143	0.22289156626506
14Deg	hybrid	CECT10109	YPS163	0.26237922705314
14Deg	hybrid	CECT10109	YPS615	0.21025641025641
14Deg	hybrid	CECT10109	YPS617	0.238603425559947
14Deg	hybrid	CECT10109	ZP_611	0.266571553994732
14Deg	hybrid	CLIB1410	1560	0.369805194805195
14Deg	hybrid	CLIB1410	2162	0.380952380952381
14Deg	hybrid	CLIB1410	2187	0.350836120401338
14Deg	hybrid	CLIB1410	BJ20	0.285797363659861
14Deg	hybrid	CLIB1410	CECT10109	0.408403361344538
14Deg	hybrid	CLIB1410	CLIB1410	0.40390203403902
14Deg	hybrid	CLIB1410	CLIB154	0.4744469870328
14Deg	hybrid	CLIB1410	CLIB382	0.283444022770399
14Deg	hybrid	CLIB1410	CLIB413	0.378344778593417
14Deg	hybrid	CLIB1410	CLIB485	0.389705882352942
14Deg	hybrid	CLIB1410	CLQCA_04-021	0.371598173515982
14Deg	hybrid	CLIB1410	CLQCA_10-027	0.298029556650247
14Deg	hybrid	CLIB1410	CLQCA_20-184	0.262726488352028
14Deg	hybrid	CLIB1410	CLQCA_20-246	0.344199346405229
14Deg	hybrid	CLIB1410	CLQCA_20-259	0.199141539928992
14Deg	hybrid	CLIB1410	DBVPG1058	0.371007371007371
14Deg	hybrid	CLIB1410	DBVPG1564	0.422535211267606
14Deg	hybrid	CLIB1410	DBVPG2088	0.345771144278607
14Deg	hybrid	CLIB1410	DBVPG3591	0.5
14Deg	hybrid	CLIB1410	ES4M07	0.322004608294931
14Deg	hybrid	CLIB1410	EXF-5247	0.2869523350987
14Deg	hybrid	CLIB1410	EXF-5248	0.320301291248207
14Deg	hybrid	CLIB1410	EXF-5295	0.300611413043479
14Deg	hybrid	CLIB1410	EXF-5297	0.288572458543619
14Deg	hybrid	CLIB1410	EXF-7197	0.362977602108037
14Deg	hybrid	CLIB1410	FY	0.327586206896552
14Deg	hybrid	CLIB1410	HN15	0.188805346700084
14Deg	hybrid	CLIB1410	HN16	0.16542288557214
14Deg	hybrid	CLIB1410	I14	0.397376543209877
14Deg	hybrid	CLIB1410	L-1374	0.409213362068966
14Deg	hybrid	CLIB1410	NC-02	0.448621553884712
14Deg	hybrid	CLIB1410	NPA03.1	0.240199750312109
14Deg	hybrid	CLIB1410	CLIB1071	0.37689393939394
14Deg	hybrid	CLIB1410	HN10	0.223227752639517
14Deg	hybrid	CLIB1410	S1278b	0.403995560488347
14Deg	hybrid	CLIB1410	Sample_40	0.349089635854341
14Deg	hybrid	CLIB1410	T7	0.362014453477868
14Deg	hybrid	CLIB1410	UC8	0.330464480874317
14Deg	hybrid	CLIB1410	UCD_05-780	0.331730769230769
14Deg	hybrid	CLIB1410	UCD_09-448	0.319313139108624
14Deg	hybrid	CLIB1410	WE372_1	0.406530936012692
14Deg	hybrid	CLIB1410	Y12	0.321305841924398
14Deg	hybrid	CLIB1410	YJM326	0.355990783410138
14Deg	hybrid	CLIB1410	YJM421	0.282590612002377
14Deg	hybrid	CLIB1410	YJM434	0.372431506849315
14Deg	hybrid	CLIB1410	YJM627	0.295875420875421
14Deg	hybrid	CLIB1410	YJM990	0.476312576312576
14Deg	hybrid	CLIB1410	YPS133	0.327160493827161
14Deg	hybrid	CLIB1410	YPS141	0.343350754936121
14Deg	hybrid	CLIB1410	YPS142	0.279475308641976
14Deg	hybrid	CLIB1410	YPS143	0.335437589670014
14Deg	hybrid	CLIB1410	YPS163	0.285762483130904
14Deg	hybrid	CLIB1410	YPS615	0.237305178481649
14Deg	hybrid	CLIB1410	YPS617	0.25797612057154
14Deg	hybrid	CLIB1410	ZP_611	0.286718581008004
14Deg	hybrid	CLIB154	1560	0.346442687747035
14Deg	hybrid	CLIB154	2162	0.244686544342508
14Deg	hybrid	CLIB154	2187	0.399950592885376
14Deg	hybrid	CLIB154	BJ20	0.331970987796454
14Deg	hybrid	CLIB154	CECT10109	0.513157894736842
14Deg	hybrid	CLIB154	CLIB1410	0.430501930501931
14Deg	hybrid	CLIB154	CLIB154	0.596107849532507
14Deg	hybrid	CLIB154	CLIB382	0.449649859943978
14Deg	hybrid	CLIB154	CLIB413	0.414313946922643
14Deg	hybrid	CLIB154	CLIB485	0.456884057971015
14Deg	hybrid	CLIB154	CLQCA_04-021	0.175876010781671
14Deg	hybrid	CLIB154	CLQCA_10-027	0.315132983886624
14Deg	hybrid	CLIB154	CLQCA_20-184	0.271115409413282
14Deg	hybrid	CLIB154	CLQCA_20-246	0.294629267232007
14Deg	hybrid	CLIB154	CLQCA_20-259	0.187756899588961
14Deg	hybrid	CLIB154	DBVPG1058	0.457516339869281
14Deg	hybrid	CLIB154	DBVPG1564	1.07894736842105
14Deg	hybrid	CLIB154	DBVPG2088	0.570279928528886
14Deg	hybrid	CLIB154	DBVPG3591	0.554774083546462
14Deg	hybrid	CLIB154	ES4M07	0.298878504672897
14Deg	hybrid	CLIB154	EXF-5247	0.384915254237288
14Deg	hybrid	CLIB154	EXF-5248	0.380357142857143
14Deg	hybrid	CLIB154	EXF-5295	0.449907994275199
14Deg	hybrid	CLIB154	EXF-5297	0.45774647887324
14Deg	hybrid	CLIB154	EXF-7197	0.436147186147186
14Deg	hybrid	CLIB154	FY	0.30241935483871
14Deg	hybrid	CLIB154	HN15	0.186160420775806
14Deg	hybrid	CLIB154	HN16	0.174157708679028
14Deg	hybrid	CLIB154	I14	0.390243902439024
14Deg	hybrid	CLIB154	L-1374	0.660486891385768
14Deg	hybrid	CLIB154	NC-02	1.47472184267031
14Deg	hybrid	CLIB154	NPA03.1	0.236396677050883
14Deg	hybrid	CLIB154	CLIB1071	0.4446227929374
14Deg	hybrid	CLIB154	HN10	0.381239580268707
14Deg	hybrid	CLIB154	S1278b	0.397435897435898
14Deg	hybrid	CLIB154	Sample_40	0.290350311626908
14Deg	hybrid	CLIB154	T7	0.366100613888225
14Deg	hybrid	CLIB154	UC8	0.483597883597883
14Deg	hybrid	CLIB154	UCD_05-780	0.356818181818182
14Deg	hybrid	CLIB154	UCD_09-448	0.291005291005291
14Deg	hybrid	CLIB154	WE372_1	0.476002290950745
14Deg	hybrid	CLIB154	Y12	0.295590185676393
14Deg	hybrid	CLIB154	YJM326	0.659605199807415
14Deg	hybrid	CLIB154	YJM421	0.330383480825959
14Deg	hybrid	CLIB154	YJM434	0.493589743589744
14Deg	hybrid	CLIB154	YJM627	0.256603006907761
14Deg	hybrid	CLIB154	YJM990	0.0934376358105171
14Deg	hybrid	CLIB154	YPS133	0.26759410801964
14Deg	hybrid	CLIB154	YPS141	0.293790656416322
14Deg	hybrid	CLIB154	YPS142	0.22443432265648
14Deg	hybrid	CLIB154	YPS143	0.269230769230769
14Deg	hybrid	CLIB154	YPS163	0.317142857142857
14Deg	hybrid	CLIB154	YPS615	0.222204305409981
14Deg	hybrid	CLIB154	YPS617	0.229243949832186
14Deg	hybrid	CLIB154	ZP_611	0.347108969607117
14Deg	hybrid	CLIB382	1560	0.246918709320039
14Deg	hybrid	CLIB382	2162	0.197701149425288
14Deg	hybrid	CLIB382	2187	0.225396825396826
14Deg	hybrid	CLIB382	BJ20	0.270302867863844
14Deg	hybrid	CLIB382	CECT10109	0.388463641334062
14Deg	hybrid	CLIB382	CLIB1410	0.313435003631082
14Deg	hybrid	CLIB382	CLIB154	0.478221415607986
14Deg	hybrid	CLIB382	CLIB382	0.373399715504979
14Deg	hybrid	CLIB382	CLIB413	0.315585585585585
14Deg	hybrid	CLIB382	CLIB485	0.325692267502613
14Deg	hybrid	CLIB382	CLQCA_04-021	0.206387546967258
14Deg	hybrid	CLIB382	CLQCA_10-027	0.221328671328671
14Deg	hybrid	CLIB382	CLQCA_20-184	0.230456577699499
14Deg	hybrid	CLIB382	CLQCA_20-246	0.242753623188406
14Deg	hybrid	CLIB382	CLQCA_20-259	0.138209098932841
14Deg	hybrid	CLIB382	DBVPG1058	0.626900584795322
14Deg	hybrid	CLIB382	DBVPG1564	0.296947496947497
14Deg	hybrid	CLIB382	DBVPG2088	0.338793103448276
14Deg	hybrid	CLIB382	DBVPG3591	0.455972906403941
14Deg	hybrid	CLIB382	ES4M07	0.177927927927928
14Deg	hybrid	CLIB382	EXF-5247	0.30935064935065
14Deg	hybrid	CLIB382	EXF-5248	0.308689024390244
14Deg	hybrid	CLIB382	EXF-5295	0.290919776667646
14Deg	hybrid	CLIB382	EXF-5297	0.269135802469136
14Deg	hybrid	CLIB382	EXF-7197	0.290845070422535
14Deg	hybrid	CLIB382	FY	0.21235014985015
14Deg	hybrid	CLIB382	HN15	0.187511444790331
14Deg	hybrid	CLIB382	HN16	0.164678774735701
14Deg	hybrid	CLIB382	I14	0.261711711711712
14Deg	hybrid	CLIB382	L-1374	0.327868852459016
14Deg	hybrid	CLIB382	NC-02	0.287157287157288
14Deg	hybrid	CLIB382	NPA03.1	0.188982213438735
14Deg	hybrid	CLIB382	CLIB1071	0.335616438356165
14Deg	hybrid	CLIB382	HN10	0.28169014084507
14Deg	hybrid	CLIB382	S1278b	0.415654520917679
14Deg	hybrid	CLIB382	Sample_40	0.268937952036544
14Deg	hybrid	CLIB382	T7	0.255617062845979
14Deg	hybrid	CLIB382	UC8	0.380191256830601
14Deg	hybrid	CLIB382	UCD_05-780	0.233722306781668
14Deg	hybrid	CLIB382	UCD_09-448	0.211111111111111
14Deg	hybrid	CLIB382	WE372_1	0.403389830508475
14Deg	hybrid	CLIB382	Y12	0.333498023715415
14Deg	hybrid	CLIB382	YJM326	0.461651053864169
14Deg	hybrid	CLIB382	YJM421	0.267676767676768
14Deg	hybrid	CLIB382	YJM434	0.362103174603175
14Deg	hybrid	CLIB382	YJM627	0.250054077438893
14Deg	hybrid	CLIB382	YJM990	0.26969696969697
14Deg	hybrid	CLIB382	YPS133	0.270166453265045
14Deg	hybrid	CLIB382	YPS141	0.272727272727273
14Deg	hybrid	CLIB382	YPS142	0.209876543209877
14Deg	hybrid	CLIB382	YPS143	0.259146341463415
14Deg	hybrid	CLIB382	YPS163	0.265747261345853
14Deg	hybrid	CLIB382	YPS615	0.237233354880414
14Deg	hybrid	CLIB382	YPS617	0.213569148589668
14Deg	hybrid	CLIB382	ZP_611	0.256776556776557
14Deg	hybrid	CLIB413	1560	0.239636425416242
14Deg	hybrid	CLIB413	2162	0.235483007760236
14Deg	hybrid	CLIB413	2187	0.296129837702872
14Deg	hybrid	CLIB413	BJ20	0.216261808367072
14Deg	hybrid	CLIB413	CECT10109	0.351732013703845
14Deg	hybrid	CLIB413	CLIB1410	0.404819277108434
14Deg	hybrid	CLIB413	CLIB154	0.40439108803807
14Deg	hybrid	CLIB413	CLIB382	0.256803652968037
14Deg	hybrid	CLIB413	CLIB413	0.277777777777778
14Deg	hybrid	CLIB413	CLIB485	0.369638242894057
14Deg	hybrid	CLIB413	CLQCA_04-021	0.311942546044249
14Deg	hybrid	CLIB413	CLQCA_10-027	0.303885422575156
14Deg	hybrid	CLIB413	CLQCA_20-184	0.243918561607615
14Deg	hybrid	CLIB413	CLQCA_20-246	0.227491601343785
14Deg	hybrid	CLIB413	CLQCA_20-259	0.203571428571429
14Deg	hybrid	CLIB413	DBVPG1058	0.427304402914159
14Deg	hybrid	CLIB413	DBVPG1564	0.409272891644066
14Deg	hybrid	CLIB413	DBVPG2088	0.420952380952381
14Deg	hybrid	CLIB413	DBVPG3591	0.439957302971002
14Deg	hybrid	CLIB413	ES4M07	0.25625
14Deg	hybrid	CLIB413	EXF-5247	0.331225534477567
14Deg	hybrid	CLIB413	EXF-5248	0.311149524632671
14Deg	hybrid	CLIB413	EXF-5295	0.33739837398374
14Deg	hybrid	CLIB413	EXF-5297	0.342497556207234
14Deg	hybrid	CLIB413	EXF-7197	0.318957456755493
14Deg	hybrid	CLIB413	FY	0.227448337825697
14Deg	hybrid	CLIB413	HN15	0.173611111111112
14Deg	hybrid	CLIB413	HN16	0.179032976827095
14Deg	hybrid	CLIB413	I14	0.303859306301906
14Deg	hybrid	CLIB413	L-1374	0.365362485615651
14Deg	hybrid	CLIB413	NC-02	0.371851851851852
14Deg	hybrid	CLIB413	NPA03.1	0.15179781551463
14Deg	hybrid	CLIB413	CLIB1071	0.357553058676655
14Deg	hybrid	CLIB413	HN10	0.258004107768515
14Deg	hybrid	CLIB413	S1278b	0.323809523809524
14Deg	hybrid	CLIB413	Sample_40	0.266999341960957
14Deg	hybrid	CLIB413	T7	0.294154655685198
14Deg	hybrid	CLIB413	UC8	0.324812764571801
14Deg	hybrid	CLIB413	UCD_05-780	0.300621563471193
14Deg	hybrid	CLIB413	UCD_09-448	0.294642857142857
14Deg	hybrid	CLIB413	WE372_1	0.339556962025317
14Deg	hybrid	CLIB413	Y12	0.293041926851025
14Deg	hybrid	CLIB413	YJM326	0.647977470558116
14Deg	hybrid	CLIB413	YJM421	0.341978092783505
14Deg	hybrid	CLIB413	YJM434	0.371264642601004
14Deg	hybrid	CLIB413	YJM627	0.248853211009175
14Deg	hybrid	CLIB413	YJM990	0.402380952380953
14Deg	hybrid	CLIB413	YPS133	0.293201754385965
14Deg	hybrid	CLIB413	YPS141	0.282730263157895
14Deg	hybrid	CLIB413	YPS142	0.314059433697786
14Deg	hybrid	CLIB413	YPS143	0.252272727272728
14Deg	hybrid	CLIB413	YPS163	0.256868131868132
14Deg	hybrid	CLIB413	YPS615	0.210745742806812
14Deg	hybrid	CLIB413	YPS617	0.202205882352941
14Deg	hybrid	CLIB413	ZP_611	0.245754963427378
14Deg	hybrid	CLIB485	1560	0.285326086956522
14Deg	hybrid	CLIB485	2162	0.29101578642863
14Deg	hybrid	CLIB485	2187	0.3750346740638
14Deg	hybrid	CLIB485	BJ20	0.176441677588467
14Deg	hybrid	CLIB485	CECT10109	0.147511312217195
14Deg	hybrid	CLIB485	CLIB1410	0.319030412526348
14Deg	hybrid	CLIB485	CLIB154	0.371932173136992
14Deg	hybrid	CLIB485	CLIB382	0.312533912099838
14Deg	hybrid	CLIB485	CLIB413	0.216981132075472
14Deg	hybrid	CLIB485	CLIB485	0.343918918918919
14Deg	hybrid	CLIB485	CLQCA_04-021	0.378005115089514
14Deg	hybrid	CLIB485	CLQCA_10-027	0.30296756383713
14Deg	hybrid	CLIB485	CLQCA_20-184	0.212645708230307
14Deg	hybrid	CLIB485	CLQCA_20-246	0.233207831325301
14Deg	hybrid	CLIB485	CLQCA_20-259	0.181538822425522
14Deg	hybrid	CLIB485	DBVPG1058	0.259476031215162
14Deg	hybrid	CLIB485	DBVPG1564	0.404052197802198
14Deg	hybrid	CLIB485	DBVPG2088	0.426312460468058
14Deg	hybrid	CLIB485	DBVPG3591	0.206128747795415
14Deg	hybrid	CLIB485	ES4M07	0.342080889163322
14Deg	hybrid	CLIB485	EXF-5247	0.305782060785768
14Deg	hybrid	CLIB485	EXF-5248	0.308536585365854
14Deg	hybrid	CLIB485	EXF-5295	0.329478609625669
14Deg	hybrid	CLIB485	EXF-5297	0.314896214896215
14Deg	hybrid	CLIB485	EXF-7197	0.368679245283019
14Deg	hybrid	CLIB485	FY	0.222199383350463
14Deg	hybrid	CLIB485	HN15	0.186203863459522
14Deg	hybrid	CLIB485	HN16	0.181961154360305
14Deg	hybrid	CLIB485	I14	0.257924528301887
14Deg	hybrid	CLIB485	L-1374	0.464772727272727
14Deg	hybrid	CLIB485	NC-02	0.503319919517103
14Deg	hybrid	CLIB485	NPA03.1	0.182693911592995
14Deg	hybrid	CLIB485	CLIB1071	0.402103273071015
14Deg	hybrid	CLIB485	HN10	0.3482266693085
14Deg	hybrid	CLIB485	S1278b	0.272710622710623
14Deg	hybrid	CLIB485	Sample_40	0.321428571428572
14Deg	hybrid	CLIB485	T7	0.354065356934449
14Deg	hybrid	CLIB485	UC8	0.300110741971207
14Deg	hybrid	CLIB485	UCD_05-780	0.31374269005848
14Deg	hybrid	CLIB485	UCD_09-448	0.281060606060606
14Deg	hybrid	CLIB485	WE372_1	0.449993826398321
14Deg	hybrid	CLIB485	Y12	0.258639910813824
14Deg	hybrid	CLIB485	YJM326	0.439081746920493
14Deg	hybrid	CLIB485	YJM421	0.253616980772892
14Deg	hybrid	CLIB485	YJM434	0.336002178649238
14Deg	hybrid	CLIB485	YJM627	0.258069996602107
14Deg	hybrid	CLIB485	YJM990	0.394551519644181
14Deg	hybrid	CLIB485	YPS133	0.311827956989247
14Deg	hybrid	CLIB485	YPS141	0.328282828282828
14Deg	hybrid	CLIB485	YPS142	0.262306346826587
14Deg	hybrid	CLIB485	YPS143	0.302310488058152
14Deg	hybrid	CLIB485	YPS163	0.200140285246669
14Deg	hybrid	CLIB485	YPS615	0.214029180695848
14Deg	hybrid	CLIB485	YPS617	0.198196690834728
14Deg	hybrid	CLIB485	ZP_611	0.273349937733499
14Deg	hybrid	CLQCA_04-021	1560	0.331372549019608
14Deg	hybrid	CLQCA_04-021	2162	0.353250244379277
14Deg	hybrid	CLQCA_04-021	2187	0.335680751173709
14Deg	hybrid	CLQCA_04-021	BJ20	0.276400679117148
14Deg	hybrid	CLQCA_04-021	CECT10109	0.362625313283208
14Deg	hybrid	CLQCA_04-021	CLIB1410	0.448627322045044
14Deg	hybrid	CLQCA_04-021	CLIB154	0.508474576271186
14Deg	hybrid	CLQCA_04-021	CLIB382	0.403388608507571
14Deg	hybrid	CLQCA_04-021	CLIB413	0.360714285714286
14Deg	hybrid	CLQCA_04-021	CLIB485	0.487171052631579
14Deg	hybrid	CLQCA_04-021	CLQCA_04-021	0.489726027397261
14Deg	hybrid	CLQCA_04-021	CLQCA_10-027	0.436507936507937
14Deg	hybrid	CLQCA_04-021	CLQCA_20-184	0.284615384615385
14Deg	hybrid	CLQCA_04-021	CLQCA_20-246	0.375963117342428
14Deg	hybrid	CLQCA_04-021	CLQCA_20-259	0.229717438758186
14Deg	hybrid	CLQCA_04-021	DBVPG1058	0.506671410781
14Deg	hybrid	CLQCA_04-021	DBVPG1564	0.490425186627718
14Deg	hybrid	CLQCA_04-021	DBVPG2088	0.430229803364132
14Deg	hybrid	CLQCA_04-021	DBVPG3591	0.37689393939394
14Deg	hybrid	CLQCA_04-021	ES4M07	0.362193903048476
14Deg	hybrid	CLQCA_04-021	EXF-5247	0.400197628458498
14Deg	hybrid	CLQCA_04-021	EXF-5248	0.427521008403362
14Deg	hybrid	CLQCA_04-021	EXF-5295	0.420128365127474
14Deg	hybrid	CLQCA_04-021	EXF-5297	0.421052631578947
14Deg	hybrid	CLQCA_04-021	EXF-7197	0.362852664576802
14Deg	hybrid	CLQCA_04-021	FY	0.235624586913417
14Deg	hybrid	CLQCA_04-021	HN15	0.149167317200104
14Deg	hybrid	CLQCA_04-021	HN16	0.151966372185808
14Deg	hybrid	CLQCA_04-021	I14	0.38961038961039
14Deg	hybrid	CLQCA_04-021	L-1374	0.514495798319327
14Deg	hybrid	CLQCA_04-021	NC-02	0.499777183600713
14Deg	hybrid	CLQCA_04-021	NPA03.1	0.224080267558529
14Deg	hybrid	CLQCA_04-021	CLIB1071	0.468745116424442
14Deg	hybrid	CLQCA_04-021	HN10	0.481663113006397
14Deg	hybrid	CLQCA_04-021	S1278b	0.34148185483871
14Deg	hybrid	CLQCA_04-021	Sample_40	0.415242165242165
14Deg	hybrid	CLQCA_04-021	T7	0.440348101265823
14Deg	hybrid	CLQCA_04-021	UC8	0.404607397793641
14Deg	hybrid	CLQCA_04-021	UCD_05-780	0.318014705882353
14Deg	hybrid	CLQCA_04-021	UCD_09-448	0.410958904109589
14Deg	hybrid	CLQCA_04-021	WE372_1	0.534992784992785
14Deg	hybrid	CLQCA_04-021	Y12	0.375058602906704
14Deg	hybrid	CLQCA_04-021	YJM326	0.50438340151958
14Deg	hybrid	CLQCA_04-021	YJM421	0.353243530662886
14Deg	hybrid	CLQCA_04-021	YJM434	0.443670787044281
14Deg	hybrid	CLQCA_04-021	YJM627	0.297060024499796
14Deg	hybrid	CLQCA_04-021	YJM990	0.528475199020209
14Deg	hybrid	CLQCA_04-021	YPS133	0.431390977443609
14Deg	hybrid	CLQCA_04-021	YPS141	0.410173160173161
14Deg	hybrid	CLQCA_04-021	YPS142	0.282202111613876
14Deg	hybrid	CLQCA_04-021	YPS143	0.368690654672664
14Deg	hybrid	CLQCA_04-021	YPS163	0.3261569416499
14Deg	hybrid	CLQCA_04-021	YPS615	0.27129750982962
14Deg	hybrid	CLQCA_04-021	YPS617	0.261128526645768
14Deg	hybrid	CLQCA_04-021	ZP_611	0.42247369465952
14Deg	hybrid	CLQCA_10-027	1560	0.261387163561077
14Deg	hybrid	CLQCA_10-027	2162	0.363952020202021
14Deg	hybrid	CLQCA_10-027	2187	0.277387041773231
14Deg	hybrid	CLQCA_10-027	BJ20	0.256932860717265
14Deg	hybrid	CLQCA_10-027	CECT10109	0.268927125506073
14Deg	hybrid	CLQCA_10-027	CLIB1410	0.410958904109589
14Deg	hybrid	CLQCA_10-027	CLIB154	0.36751027471339
14Deg	hybrid	CLQCA_10-027	CLIB382	0.338095238095238
14Deg	hybrid	CLQCA_10-027	CLIB413	0.282097649186257
14Deg	hybrid	CLQCA_10-027	CLIB485	0.461904761904762
14Deg	hybrid	CLQCA_10-027	CLQCA_04-021	0.451158301158301
14Deg	hybrid	CLQCA_10-027	CLQCA_10-027	0.365476190476191
14Deg	hybrid	CLQCA_10-027	CLQCA_20-184	0.224576271186441
14Deg	hybrid	CLQCA_10-027	CLQCA_20-246	0.336124031007752
14Deg	hybrid	CLQCA_10-027	CLQCA_20-259	0.194199631071941
14Deg	hybrid	CLQCA_10-027	DBVPG1058	0.503133568350959
14Deg	hybrid	CLQCA_10-027	DBVPG1564	0.497058823529412
14Deg	hybrid	CLQCA_10-027	DBVPG2088	0.414222873900293
14Deg	hybrid	CLQCA_10-027	DBVPG3591	0.357936507936508
14Deg	hybrid	CLQCA_10-027	ES4M07	0.266919831223629
14Deg	hybrid	CLQCA_10-027	EXF-5247	0.3546875
14Deg	hybrid	CLQCA_10-027	EXF-5248	0.375960061443932
14Deg	hybrid	CLQCA_10-027	EXF-5295	0.391414141414142
14Deg	hybrid	CLQCA_10-027	EXF-5297	0.367882117882118
14Deg	hybrid	CLQCA_10-027	EXF-7197	0.284784464361929
14Deg	hybrid	CLQCA_10-027	FY	0.193897740289493
14Deg	hybrid	CLQCA_10-027	HN15	0.133741258741259
14Deg	hybrid	CLQCA_10-027	HN16	0.127510683760684
14Deg	hybrid	CLQCA_10-027	I14	0.312858926342072
14Deg	hybrid	CLQCA_10-027	L-1374	0.524849094567404
14Deg	hybrid	CLQCA_10-027	NC-02	0.542857142857143
14Deg	hybrid	CLQCA_10-027	NPA03.1	0.240007836990596
14Deg	hybrid	CLQCA_10-027	CLIB1071	0.393606393606394
14Deg	hybrid	CLQCA_10-027	HN10	0.331372549019608
14Deg	hybrid	CLQCA_10-027	S1278b	0.33037178786222
14Deg	hybrid	CLQCA_10-027	Sample_40	0.364617940199335
14Deg	hybrid	CLQCA_10-027	T7	0.355008367200574
14Deg	hybrid	CLQCA_10-027	UC8	0.381262939958593
14Deg	hybrid	CLQCA_10-027	UCD_05-780	0.315315315315315
14Deg	hybrid	CLQCA_10-027	UCD_09-448	0.406235349273324
14Deg	hybrid	CLQCA_10-027	WE372_1	0.455098934550989
14Deg	hybrid	CLQCA_10-027	Y12	0.320381231671554
14Deg	hybrid	CLQCA_10-027	YJM326	0.425529542920848
14Deg	hybrid	CLQCA_10-027	YJM421	0.347058823529412
14Deg	hybrid	CLQCA_10-027	YJM434	0.361731052452702
14Deg	hybrid	CLQCA_10-027	YJM627	0.252424211493314
14Deg	hybrid	CLQCA_10-027	YJM990	0.559393346379648
14Deg	hybrid	CLQCA_10-027	YPS133	0.346153846153846
14Deg	hybrid	CLQCA_10-027	YPS141	0.368112014453478
14Deg	hybrid	CLQCA_10-027	YPS142	0.298424467099166
14Deg	hybrid	CLQCA_10-027	YPS143	0.333134114272054
14Deg	hybrid	CLQCA_10-027	YPS163	0.268937952036544
14Deg	hybrid	CLQCA_10-027	YPS615	0.2110368956743
14Deg	hybrid	CLQCA_10-027	YPS617	0.166646631003186
14Deg	hybrid	CLQCA_10-027	ZP_611	0.321596244131455
14Deg	hybrid	CLQCA_20-184	1560	0.275752236378423
14Deg	hybrid	CLQCA_20-184	2162	0.22683615819209
14Deg	hybrid	CLQCA_20-184	2187	0.252644495218753
14Deg	hybrid	CLQCA_20-184	BJ20	0.157356509681573
14Deg	hybrid	CLQCA_20-184	CECT10109	0.251315789473684
14Deg	hybrid	CLQCA_20-184	CLIB1410	0.282456563706563
14Deg	hybrid	CLQCA_20-184	CLIB154	0.26954301975226
14Deg	hybrid	CLQCA_20-184	CLIB382	0.257628920786815
14Deg	hybrid	CLQCA_20-184	CLIB413	0.232145402708482
14Deg	hybrid	CLQCA_20-184	CLIB485	0.324431099873578
14Deg	hybrid	CLQCA_20-184	CLQCA_04-021	0.274422248335291
14Deg	hybrid	CLQCA_20-184	CLQCA_10-027	0.246495327102804
14Deg	hybrid	CLQCA_20-184	CLQCA_20-184	0.276299201568847
14Deg	hybrid	CLQCA_20-184	CLQCA_20-246	0.170601379578355
14Deg	hybrid	CLQCA_20-184	CLQCA_20-259	0.180998899284535
14Deg	hybrid	CLQCA_20-184	DBVPG1058	0.338732754215637
14Deg	hybrid	CLQCA_20-184	DBVPG1564	0.337536656891496
14Deg	hybrid	CLQCA_20-184	DBVPG2088	0.289339539007092
14Deg	hybrid	CLQCA_20-184	DBVPG3591	0.267687747035574
14Deg	hybrid	CLQCA_20-184	ES4M07	0.192535107169253
14Deg	hybrid	CLQCA_20-184	EXF-5247	0.251262626262627
14Deg	hybrid	CLQCA_20-184	EXF-5248	0.292792792792792
14Deg	hybrid	CLQCA_20-184	EXF-5295	0.286324786324787
14Deg	hybrid	CLQCA_20-184	EXF-5297	0.280846744961577
14Deg	hybrid	CLQCA_20-184	EXF-7197	0.248762611840852
14Deg	hybrid	CLQCA_20-184	FY	0.169385555156306
14Deg	hybrid	CLQCA_20-184	HN15	0.165223486722745
14Deg	hybrid	CLQCA_20-184	HN16	0.176944971537002
14Deg	hybrid	CLQCA_20-184	I14	0.272868217054264
14Deg	hybrid	CLQCA_20-184	L-1374	0.278211382113821
14Deg	hybrid	CLQCA_20-184	NC-02	0.372222222222222
14Deg	hybrid	CLQCA_20-184	NPA03.1	0.197605424878152
14Deg	hybrid	CLQCA_20-184	CLIB1071	0.24991423670669
14Deg	hybrid	CLQCA_20-184	HN10	0.182692307692308
14Deg	hybrid	CLQCA_20-184	S1278b	0.250822226068894
14Deg	hybrid	CLQCA_20-184	Sample_40	0.263701990468181
14Deg	hybrid	CLQCA_20-184	T7	0.276477832512316
14Deg	hybrid	CLQCA_20-184	UC8	0.298995194408039
14Deg	hybrid	CLQCA_20-184	UCD_05-780	0.221300041846841
14Deg	hybrid	CLQCA_20-184	UCD_09-448	0.249910065472336
14Deg	hybrid	CLQCA_20-184	WE372_1	0.326764705882353
14Deg	hybrid	CLQCA_20-184	Y12	0.282861315722632
14Deg	hybrid	CLQCA_20-184	YJM326	0.408455284552846
14Deg	hybrid	CLQCA_20-184	YJM421	0.26937441643324
14Deg	hybrid	CLQCA_20-184	YJM434	0.26529592108771
14Deg	hybrid	CLQCA_20-184	YJM627	0.157305577376276
14Deg	hybrid	CLQCA_20-184	YJM990	0.319748069890288
14Deg	hybrid	CLQCA_20-184	YPS133	0.23296434080392
14Deg	hybrid	CLQCA_20-184	YPS141	0.252142386288728
14Deg	hybrid	CLQCA_20-184	YPS142	0.229419703103914
14Deg	hybrid	CLQCA_20-184	YPS143	0.27132914931958
14Deg	hybrid	CLQCA_20-184	YPS163	0.213675213675214
14Deg	hybrid	CLQCA_20-184	YPS615	0.236478365384616
14Deg	hybrid	CLQCA_20-184	YPS617	0.240156266063535
14Deg	hybrid	CLQCA_20-184	ZP_611	0.219219219219219
14Deg	hybrid	CLQCA_20-246	1560	0.298750557786702
14Deg	hybrid	CLQCA_20-246	2162	0.267676767676768
14Deg	hybrid	CLQCA_20-246	2187	0.316626506024097
14Deg	hybrid	CLQCA_20-246	BJ20	0.230379188712522
14Deg	hybrid	CLQCA_20-246	CECT10109	0.293720657276996
14Deg	hybrid	CLQCA_20-246	CLIB1410	0.277505330490405
14Deg	hybrid	CLQCA_20-246	CLIB154	0.41547131147541
14Deg	hybrid	CLQCA_20-246	CLIB382	0.224014336917563
14Deg	hybrid	CLQCA_20-246	CLIB413	0.312858926342072
14Deg	hybrid	CLQCA_20-246	CLIB485	0.304492804492805
14Deg	hybrid	CLQCA_20-246	CLQCA_04-021	0.264297385620915
14Deg	hybrid	CLQCA_20-246	CLQCA_10-027	0.225384615384616
14Deg	hybrid	CLQCA_20-246	CLQCA_20-184	0.25348263092929
14Deg	hybrid	CLQCA_20-246	CLQCA_20-246	0.238765928906774
14Deg	hybrid	CLQCA_20-246	CLQCA_20-259	0.154661864745898
14Deg	hybrid	CLQCA_20-246	DBVPG1058	0.315049751243782
14Deg	hybrid	CLQCA_20-246	DBVPG1564	0.339712918660288
14Deg	hybrid	CLQCA_20-246	DBVPG2088	0.328205128205128
14Deg	hybrid	CLQCA_20-246	DBVPG3591	0.46875
14Deg	hybrid	CLQCA_20-246	ES4M07	0.256410256410257
14Deg	hybrid	CLQCA_20-246	EXF-5247	0.297540983606558
14Deg	hybrid	CLQCA_20-246	EXF-5248	0.28966894977169
14Deg	hybrid	CLQCA_20-246	EXF-5295	0.277387041773231
14Deg	hybrid	CLQCA_20-246	EXF-5297	0.281993511175198
14Deg	hybrid	CLQCA_20-246	EXF-7197	0.337899543378996
14Deg	hybrid	CLQCA_20-246	FY	0.261904761904762
14Deg	hybrid	CLQCA_20-246	HN15	0.150861085766423
14Deg	hybrid	CLQCA_20-246	HN16	0.145299145299145
14Deg	hybrid	CLQCA_20-246	I14	0.314072003945422
14Deg	hybrid	CLQCA_20-246	L-1374	0.34929435483871
14Deg	hybrid	CLQCA_20-246	NC-02	0.352031207963412
14Deg	hybrid	CLQCA_20-246	NPA03.1	0.191527617951669
14Deg	hybrid	CLQCA_20-246	CLIB1071	0.339705882352941
14Deg	hybrid	CLQCA_20-246	HN10	0.280049786628734
14Deg	hybrid	CLQCA_20-246	S1278b	0.30432808716707
14Deg	hybrid	CLQCA_20-246	Sample_40	0.327749360613811
14Deg	hybrid	CLQCA_20-246	T7	0.3125
14Deg	hybrid	CLQCA_20-246	UC8	0.313141923436041
14Deg	hybrid	CLQCA_20-246	UCD_05-780	0.261538461538462
14Deg	hybrid	CLQCA_20-246	UCD_09-448	0.255597688696281
14Deg	hybrid	CLQCA_20-246	WE372_1	0.424430641821947
14Deg	hybrid	CLQCA_20-246	Y12	0.303370786516854
14Deg	hybrid	CLQCA_20-246	YJM326	0.335897435897436
14Deg	hybrid	CLQCA_20-246	YJM421	0.274615384615385
14Deg	hybrid	CLQCA_20-246	YJM434	0.270114942528735
14Deg	hybrid	CLQCA_20-246	YJM627	0.22302965851353
14Deg	hybrid	CLQCA_20-246	YJM990	0.344006147540983
14Deg	hybrid	CLQCA_20-246	YPS133	0.291898148148148
14Deg	hybrid	CLQCA_20-246	YPS141	0.296536796536797
14Deg	hybrid	CLQCA_20-246	YPS142	0.248533950617284
14Deg	hybrid	CLQCA_20-246	YPS143	0.299473804621368
14Deg	hybrid	CLQCA_20-246	YPS163	0.299734333489608
14Deg	hybrid	CLQCA_20-246	YPS615	0.227078565980168
14Deg	hybrid	CLQCA_20-246	YPS617	0.222238457042665
14Deg	hybrid	CLQCA_20-246	ZP_611	0.214352501168771
14Deg	hybrid	CLQCA_20-259	1560	0.249984251968504
14Deg	hybrid	CLQCA_20-259	2162	0.2
14Deg	hybrid	CLQCA_20-259	2187	0.212022090059473
14Deg	hybrid	CLQCA_20-259	BJ20	0.159095655806182
14Deg	hybrid	CLQCA_20-259	CECT10109	0.256691832532601
14Deg	hybrid	CLQCA_20-259	CLIB1410	0.285071181223548
14Deg	hybrid	CLQCA_20-259	CLIB154	0.304880488048805
14Deg	hybrid	CLQCA_20-259	CLIB382	0.207703081232493
14Deg	hybrid	CLQCA_20-259	CLIB413	0.286924939467312
14Deg	hybrid	CLQCA_20-259	CLIB485	0.305172413793104
14Deg	hybrid	CLQCA_20-259	CLQCA_04-021	0.242816481431283
14Deg	hybrid	CLQCA_20-259	CLQCA_10-027	0.212410584068339
14Deg	hybrid	CLQCA_20-259	CLQCA_20-184	0.221766848816029
14Deg	hybrid	CLQCA_20-259	CLQCA_20-246	0.193989547038328
14Deg	hybrid	CLQCA_20-259	CLQCA_20-259	0.198555486024197
14Deg	hybrid	CLQCA_20-259	DBVPG1058	0.322131357015078
14Deg	hybrid	CLQCA_20-259	DBVPG1564	0.28909794006098
14Deg	hybrid	CLQCA_20-259	DBVPG2088	0.336996336996337
14Deg	hybrid	CLQCA_20-259	DBVPG3591	0.333333333333333
14Deg	hybrid	CLQCA_20-259	ES4M07	0.18089481555334
14Deg	hybrid	CLQCA_20-259	EXF-5247	0.264174454828661
14Deg	hybrid	CLQCA_20-259	EXF-5248	0.275095347063311
14Deg	hybrid	CLQCA_20-259	EXF-5295	0.281987577639752
14Deg	hybrid	CLQCA_20-259	EXF-5297	0.295888603375234
14Deg	hybrid	CLQCA_20-259	EXF-7197	0.196097279630876
14Deg	hybrid	CLQCA_20-259	FY	0.237431859479104
14Deg	hybrid	CLQCA_20-259	HN15	0.19241134751773
14Deg	hybrid	CLQCA_20-259	HN16	0.160053929121726
14Deg	hybrid	CLQCA_20-259	I14	0.289971751412429
14Deg	hybrid	CLQCA_20-259	L-1374	0.236962695236866
14Deg	hybrid	CLQCA_20-259	NC-02	0.277105263157895
14Deg	hybrid	CLQCA_20-259	NPA03.1	0.163093132920719
14Deg	hybrid	CLQCA_20-259	CLIB1071	0.252176546294193
14Deg	hybrid	CLQCA_20-259	HN10	0.214902462424049
14Deg	hybrid	CLQCA_20-259	S1278b	0.228654387079212
14Deg	hybrid	CLQCA_20-259	Sample_40	0.220003663674666
14Deg	hybrid	CLQCA_20-259	T7	0.230377166156983
14Deg	hybrid	CLQCA_20-259	UC8	0.268518518518519
14Deg	hybrid	CLQCA_20-259	UCD_05-780	0.240519877675841
14Deg	hybrid	CLQCA_20-259	UCD_09-448	0.235360598996963
14Deg	hybrid	CLQCA_20-259	WE372_1	0.234761285156641
14Deg	hybrid	CLQCA_20-259	Y12	0.286857142857143
14Deg	hybrid	CLQCA_20-259	YJM326	0.423859649122807
14Deg	hybrid	CLQCA_20-259	YJM421	0.283740421455938
14Deg	hybrid	CLQCA_20-259	YJM434	0.333353365384615
14Deg	hybrid	CLQCA_20-259	YJM627	0.182014954742227
14Deg	hybrid	CLQCA_20-259	YJM990	0.297680858428522
14Deg	hybrid	CLQCA_20-259	YPS133	0.232563170647282
14Deg	hybrid	CLQCA_20-259	YPS141	0.234492481203008
14Deg	hybrid	CLQCA_20-259	YPS142	0.202390881289964
14Deg	hybrid	CLQCA_20-259	YPS143	0.222689075630252
14Deg	hybrid	CLQCA_20-259	YPS163	0.199056603773585
14Deg	hybrid	CLQCA_20-259	YPS615	0.197902097902098
14Deg	hybrid	CLQCA_20-259	YPS617	0.202040816326531
14Deg	hybrid	CLQCA_20-259	ZP_611	0.181736392262708
14Deg	hybrid	DBVPG1058	1560	0.43539156626506
14Deg	hybrid	DBVPG1058	2162	0.285354566489723
14Deg	hybrid	DBVPG1058	2187	0.436828716789147
14Deg	hybrid	DBVPG1058	BJ20	0.42346256684492
14Deg	hybrid	DBVPG1058	CECT10109	0.504522328999435
14Deg	hybrid	DBVPG1058	CLIB1410	0.478636363636364
14Deg	hybrid	DBVPG1058	CLIB154	0.53921568627451
14Deg	hybrid	DBVPG1058	CLIB382	0.433035714285715
14Deg	hybrid	DBVPG1058	CLIB413	0.538589015151515
14Deg	hybrid	DBVPG1058	CLIB485	0.494186046511628
14Deg	hybrid	DBVPG1058	CLQCA_04-021	0.407962109575013
14Deg	hybrid	DBVPG1058	CLQCA_10-027	0.40811320754717
14Deg	hybrid	DBVPG1058	CLQCA_20-184	0.319368282518096
14Deg	hybrid	DBVPG1058	CLQCA_20-246	0.307330827067669
14Deg	hybrid	DBVPG1058	CLQCA_20-259	0.251481237656353
14Deg	hybrid	DBVPG1058	DBVPG1058	0.555743243243244
14Deg	hybrid	DBVPG1058	DBVPG1564	0.620238095238095
14Deg	hybrid	DBVPG1058	DBVPG2088	0.459415584415585
14Deg	hybrid	DBVPG1058	DBVPG3591	0.596296296296297
14Deg	hybrid	DBVPG1058	ES4M07	0.372753763963089
14Deg	hybrid	DBVPG1058	EXF-5247	0.35845383759733
14Deg	hybrid	DBVPG1058	EXF-5248	0.363574165298303
14Deg	hybrid	DBVPG1058	EXF-5295	0.36712271973466
14Deg	hybrid	DBVPG1058	EXF-5297	0.384637964774951
14Deg	hybrid	DBVPG1058	EXF-7197	0.50438340151958
14Deg	hybrid	DBVPG1058	FY	0.472785285285285
14Deg	hybrid	DBVPG1058	HN15	0.211032388663968
14Deg	hybrid	DBVPG1058	HN16	0.207107843137254
14Deg	hybrid	DBVPG1058	I14	0.520359598096245
14Deg	hybrid	DBVPG1058	L-1374	0.423963133640553
14Deg	hybrid	DBVPG1058	NC-02	0.4
14Deg	hybrid	DBVPG1058	NPA03.1	0.311422413793104
14Deg	hybrid	DBVPG1058	CLIB1071	0.447368421052632
14Deg	hybrid	DBVPG1058	HN10	0.398275862068966
14Deg	hybrid	DBVPG1058	S1278b	0.485294117647059
14Deg	hybrid	DBVPG1058	Sample_40	0.344887506859338
14Deg	hybrid	DBVPG1058	T7	0.377853380158033
14Deg	hybrid	DBVPG1058	UC8	0.560185185185185
14Deg	hybrid	DBVPG1058	UCD_05-780	0.333730158730159
14Deg	hybrid	DBVPG1058	UCD_09-448	0.347916666666666
14Deg	hybrid	DBVPG1058	WE372_1	0.560975609756098
14Deg	hybrid	DBVPG1058	Y12	0.411442006269593
14Deg	hybrid	DBVPG1058	YJM326	0.443859649122807
14Deg	hybrid	DBVPG1058	YJM421	0.335581085581086
14Deg	hybrid	DBVPG1058	YJM434	0.381048387096774
14Deg	hybrid	DBVPG1058	YJM627	0.329872646733112
14Deg	hybrid	DBVPG1058	YJM990	0.563096500530223
14Deg	hybrid	DBVPG1058	YPS133	0.363970588235294
14Deg	hybrid	DBVPG1058	YPS141	0.386886993603412
14Deg	hybrid	DBVPG1058	YPS142	0.311128182616331
14Deg	hybrid	DBVPG1058	YPS143	0.345238095238095
14Deg	hybrid	DBVPG1058	YPS163	0.402898550724638
14Deg	hybrid	DBVPG1058	YPS615	0.278669043374926
14Deg	hybrid	DBVPG1058	YPS617	0.296464646464647
14Deg	hybrid	DBVPG1058	ZP_611	0.322916666666667
14Deg	hybrid	DBVPG1564	1560	0.448648391395393
14Deg	hybrid	DBVPG1564	2162	0.378590325018897
14Deg	hybrid	DBVPG1564	2187	0.366726430599134
14Deg	hybrid	DBVPG1564	BJ20	0.322131357015078
14Deg	hybrid	DBVPG1564	CECT10109	0.410296574770259
14Deg	hybrid	DBVPG1564	CLIB1410	0.426739926739927
14Deg	hybrid	DBVPG1564	CLIB154	0.63821036889332
14Deg	hybrid	DBVPG1564	CLIB382	0.5
14Deg	hybrid	DBVPG1564	CLIB413	0.360389610389611
14Deg	hybrid	DBVPG1564	CLIB485	0.463536463536464
14Deg	hybrid	DBVPG1564	CLQCA_04-021	0.51600821553703
14Deg	hybrid	DBVPG1564	CLQCA_10-027	0.427134646962233
14Deg	hybrid	DBVPG1564	CLQCA_20-184	0.328588193275167
14Deg	hybrid	DBVPG1564	CLQCA_20-246	0.305689424364123
14Deg	hybrid	DBVPG1564	CLQCA_20-259	0.230088495575221
14Deg	hybrid	DBVPG1564	DBVPG1058	0.832956259426848
14Deg	hybrid	DBVPG1564	DBVPG1564	0.576014381099127
14Deg	hybrid	DBVPG1564	DBVPG2088	0.5565812983919
14Deg	hybrid	DBVPG1564	DBVPG3591	0.407805429864253
14Deg	hybrid	DBVPG1564	ES4M07	0.433214338836828
14Deg	hybrid	DBVPG1564	EXF-5247	0.405067155067155
14Deg	hybrid	DBVPG1564	EXF-5248	0.429196237002806
14Deg	hybrid	DBVPG1564	EXF-5295	0.442473118279569
14Deg	hybrid	DBVPG1564	EXF-5297	0.44723731884058
14Deg	hybrid	DBVPG1564	EXF-7197	0.448723404255319
14Deg	hybrid	DBVPG1564	FY	0.335144927536232
14Deg	hybrid	DBVPG1564	HN15	0.203486073674753
14Deg	hybrid	DBVPG1564	HN16	0.203768128091206
14Deg	hybrid	DBVPG1564	I14	0.467775041050903
14Deg	hybrid	DBVPG1564	L-1374	0.557356459330143
14Deg	hybrid	DBVPG1564	NC-02	0.575681939739704
14Deg	hybrid	DBVPG1564	NPA03.1	0.301173139158576
14Deg	hybrid	DBVPG1564	CLIB1071	0.570524412296564
14Deg	hybrid	DBVPG1564	HN10	0.461885482938115
14Deg	hybrid	DBVPG1564	S1278b	0.728758169934641
14Deg	hybrid	DBVPG1564	Sample_40	0.387152777777778
14Deg	hybrid	DBVPG1564	T7	0.492275698158051
14Deg	hybrid	DBVPG1564	UC8	0.486993345432547
14Deg	hybrid	DBVPG1564	UCD_05-780	0.439492753623188
14Deg	hybrid	DBVPG1564	UCD_09-448	0.449335863377609
14Deg	hybrid	DBVPG1564	WE372_1	0.564393939393939
14Deg	hybrid	DBVPG1564	Y12	0.440221088435375
14Deg	hybrid	DBVPG1564	YJM326	0.621428571428571
14Deg	hybrid	DBVPG1564	YJM421	0.434372436423297
14Deg	hybrid	DBVPG1564	YJM434	0.431773606052116
14Deg	hybrid	DBVPG1564	YJM627	0.31875
14Deg	hybrid	DBVPG1564	YJM990	0.625116713352008
14Deg	hybrid	DBVPG1564	YPS133	0.271072796934866
14Deg	hybrid	DBVPG1564	YPS141	0.31672366064159
14Deg	hybrid	DBVPG1564	YPS142	0.362541073384447
14Deg	hybrid	DBVPG1564	YPS143	0.329728781856442
14Deg	hybrid	DBVPG1564	YPS163	0.343344155844156
14Deg	hybrid	DBVPG1564	YPS615	0.332207207207207
14Deg	hybrid	DBVPG1564	YPS617	0.336727138097001
14Deg	hybrid	DBVPG1564	ZP_611	0.344938440492476
14Deg	hybrid	DBVPG2088	1560	0.335271317829457
14Deg	hybrid	DBVPG2088	2162	0.341071428571429
14Deg	hybrid	DBVPG2088	2187	0.305555555555555
14Deg	hybrid	DBVPG2088	BJ20	0.297902379991932
14Deg	hybrid	DBVPG2088	CECT10109	0.410690758516845
14Deg	hybrid	DBVPG2088	CLIB1410	0.326086956521739
14Deg	hybrid	DBVPG2088	CLIB154	0.37519460300986
14Deg	hybrid	DBVPG2088	CLIB382	0.252272727272728
14Deg	hybrid	DBVPG2088	CLIB413	0.434413378625555
14Deg	hybrid	DBVPG2088	CLIB485	0.367798867798868
14Deg	hybrid	DBVPG2088	CLQCA_04-021	0.359261700725116
14Deg	hybrid	DBVPG2088	CLQCA_10-027	0.323515325670498
14Deg	hybrid	DBVPG2088	CLQCA_20-184	0.287735849056604
14Deg	hybrid	DBVPG2088	CLQCA_20-246	0.251858372456964
14Deg	hybrid	DBVPG2088	CLQCA_20-259	0.194335169158143
14Deg	hybrid	DBVPG2088	DBVPG1058	0.358262108262108
14Deg	hybrid	DBVPG2088	DBVPG1564	0.426406926406926
14Deg	hybrid	DBVPG2088	DBVPG2088	0.265865384615385
14Deg	hybrid	DBVPG2088	DBVPG3591	0.555487804878049
14Deg	hybrid	DBVPG2088	ES4M07	0.314542483660131
14Deg	hybrid	DBVPG2088	EXF-5247	0.366873706004141
14Deg	hybrid	DBVPG2088	EXF-5248	0.363654147104852
14Deg	hybrid	DBVPG2088	EXF-5295	0.368055555555555
14Deg	hybrid	DBVPG2088	EXF-5297	0.355429292929293
14Deg	hybrid	DBVPG2088	EXF-7197	0.369600352630033
14Deg	hybrid	DBVPG2088	FY	0.369099099099099
14Deg	hybrid	DBVPG2088	HN15	0.168987771739131
14Deg	hybrid	DBVPG2088	HN16	0.186773255813953
14Deg	hybrid	DBVPG2088	I14	0.3701166920345
14Deg	hybrid	DBVPG2088	L-1374	0.438438438438438
14Deg	hybrid	DBVPG2088	NC-02	0.449945887445888
14Deg	hybrid	DBVPG2088	NPA03.1	0.260813008130081
14Deg	hybrid	DBVPG2088	CLIB1071	0.419471624266144
14Deg	hybrid	DBVPG2088	HN10	0.368729488982654
14Deg	hybrid	DBVPG2088	S1278b	0.424646781789639
14Deg	hybrid	DBVPG2088	Sample_40	0.369503546099291
14Deg	hybrid	DBVPG2088	T7	0.365567010309279
14Deg	hybrid	DBVPG2088	UC8	0.478028876333961
14Deg	hybrid	DBVPG2088	UCD_05-780	0.323977251880389
14Deg	hybrid	DBVPG2088	UCD_09-448	0.284271284271284
14Deg	hybrid	DBVPG2088	WE372_1	0.514495798319327
14Deg	hybrid	DBVPG2088	Y12	0.394576905095839
14Deg	hybrid	DBVPG2088	YJM326	0.447250132205182
14Deg	hybrid	DBVPG2088	YJM421	0.320056899004268
14Deg	hybrid	DBVPG2088	YJM434	0.328767123287671
14Deg	hybrid	DBVPG2088	YJM627	0.324211670895252
14Deg	hybrid	DBVPG2088	YJM990	0.4
14Deg	hybrid	DBVPG2088	YPS133	0.312858926342072
14Deg	hybrid	DBVPG2088	YPS141	0.348314606741573
14Deg	hybrid	DBVPG2088	YPS142	0.286628733997155
14Deg	hybrid	DBVPG2088	YPS143	0.36247947454844
14Deg	hybrid	DBVPG2088	YPS163	0.321633825944171
14Deg	hybrid	DBVPG2088	YPS615	0.235937189425562
14Deg	hybrid	DBVPG2088	YPS617	0.253984251968504
14Deg	hybrid	DBVPG2088	ZP_611	0.234115347018573
14Deg	hybrid	DBVPG3591	1560	0.327516136743964
14Deg	hybrid	DBVPG3591	2162	0.327141236528644
14Deg	hybrid	DBVPG3591	2187	0.396969696969697
14Deg	hybrid	DBVPG3591	BJ20	0.270138888888889
14Deg	hybrid	DBVPG3591	CECT10109	0.403389830508475
14Deg	hybrid	DBVPG3591	CLIB1410	0.491935483870968
14Deg	hybrid	DBVPG3591	CLIB154	0.4609375
14Deg	hybrid	DBVPG3591	CLIB382	0.400399290150843
14Deg	hybrid	DBVPG3591	CLIB413	0.384129109028707
14Deg	hybrid	DBVPG3591	CLIB485	0.519350961538462
14Deg	hybrid	DBVPG3591	CLQCA_04-021	0.391648511256355
14Deg	hybrid	DBVPG3591	CLQCA_10-027	0.338244853737812
14Deg	hybrid	DBVPG3591	CLQCA_20-184	0.281696349850114
14Deg	hybrid	DBVPG3591	CLQCA_20-246	0.315807327001357
14Deg	hybrid	DBVPG3591	CLQCA_20-259	0.22002200220022
14Deg	hybrid	DBVPG3591	DBVPG1058	0.486685463659148
14Deg	hybrid	DBVPG3591	DBVPG1564	0.400081649316187
14Deg	hybrid	DBVPG3591	DBVPG2088	0.533091202582728
14Deg	hybrid	DBVPG3591	DBVPG3591	0.491379310344828
14Deg	hybrid	DBVPG3591	ES4M07	0.311868686868687
14Deg	hybrid	DBVPG3591	EXF-5247	0.477597402597403
14Deg	hybrid	DBVPG3591	EXF-5248	0.471428571428572
14Deg	hybrid	DBVPG3591	EXF-5295	0.469876660341556
14Deg	hybrid	DBVPG3591	EXF-5297	0.455406911928652
14Deg	hybrid	DBVPG3591	EXF-7197	0.402702702702702
14Deg	hybrid	DBVPG3591	FY	0.306787330316742
14Deg	hybrid	DBVPG3591	HN15	0.185601198117244
14Deg	hybrid	DBVPG3591	HN16	0.172421688954021
14Deg	hybrid	DBVPG3591	I14	0.362920391656024
14Deg	hybrid	DBVPG3591	L-1374	0.413574660633484
14Deg	hybrid	DBVPG3591	NC-02	0.448160535117057
14Deg	hybrid	DBVPG3591	NPA03.1	0.243503006872852
14Deg	hybrid	DBVPG3591	CLIB1071	0.335897435897436
14Deg	hybrid	DBVPG3591	HN10	0.283056548244692
14Deg	hybrid	DBVPG3591	S1278b	0.508620689655173
14Deg	hybrid	DBVPG3591	Sample_40	0.320256410256411
14Deg	hybrid	DBVPG3591	T7	0.341666666666666
14Deg	hybrid	DBVPG3591	UC8	0.393020594965675
14Deg	hybrid	DBVPG3591	UCD_05-780	0.382869249394673
14Deg	hybrid	DBVPG3591	UCD_09-448	0.327160493827161
14Deg	hybrid	DBVPG3591	WE372_1	0.411644165863066
14Deg	hybrid	DBVPG3591	Y12	0.394635343618513
14Deg	hybrid	DBVPG3591	YJM326	0.824782608695652
14Deg	hybrid	DBVPG3591	YJM421	0.397849462365591
14Deg	hybrid	DBVPG3591	YJM434	0.549929676511955
14Deg	hybrid	DBVPG3591	YJM627	0.308624031007752
14Deg	hybrid	DBVPG3591	YJM990	0.467999171499586
14Deg	hybrid	DBVPG3591	YPS133	0.283835616438356
14Deg	hybrid	DBVPG3591	YPS141	0.317894736842106
14Deg	hybrid	DBVPG3591	YPS142	0.363719862227325
14Deg	hybrid	DBVPG3591	YPS143	0.290123456790124
14Deg	hybrid	DBVPG3591	YPS163	0.301470588235294
14Deg	hybrid	DBVPG3591	YPS615	0.258869488957985
14Deg	hybrid	DBVPG3591	YPS617	0.257370744908133
14Deg	hybrid	DBVPG3591	ZP_611	0.284716027356527
14Deg	hybrid	ES4M07	1560	0.315417715352765
14Deg	hybrid	ES4M07	2162	0.346373500856653
14Deg	hybrid	ES4M07	2187	0.331503088538092
14Deg	hybrid	ES4M07	BJ20	0.274336283185841
14Deg	hybrid	ES4M07	CECT10109	0.318727818727819
14Deg	hybrid	ES4M07	CLIB1410	0.456396396396396
14Deg	hybrid	ES4M07	CLIB154	0.42967032967033
14Deg	hybrid	ES4M07	CLIB382	0.373399715504979
14Deg	hybrid	ES4M07	CLIB413	0.25675057208238
14Deg	hybrid	ES4M07	CLIB485	0.40878164556962
14Deg	hybrid	ES4M07	CLQCA_04-021	0.419841052343108
14Deg	hybrid	ES4M07	CLQCA_10-027	0.371044303797469
14Deg	hybrid	ES4M07	CLQCA_20-184	0.21431877082562
14Deg	hybrid	ES4M07	CLQCA_20-246	0.361939174947305
14Deg	hybrid	ES4M07	CLQCA_20-259	0.184659090909091
14Deg	hybrid	ES4M07	DBVPG1058	0.522203947368421
14Deg	hybrid	ES4M07	DBVPG1564	0.485805860805861
14Deg	hybrid	ES4M07	DBVPG2088	0.420911745619727
14Deg	hybrid	ES4M07	DBVPG3591	0.368484848484849
14Deg	hybrid	ES4M07	ES4M07	0.352189074002325
14Deg	hybrid	ES4M07	EXF-5247	0.272407045009785
14Deg	hybrid	ES4M07	EXF-5248	0.355042016806723
14Deg	hybrid	ES4M07	EXF-5295	0.289240506329114
14Deg	hybrid	ES4M07	EXF-5297	0.306020066889632
14Deg	hybrid	ES4M07	EXF-7197	0.291290322580645
14Deg	hybrid	ES4M07	FY	0.265963416002693
14Deg	hybrid	ES4M07	HN15	0.184415978170242
14Deg	hybrid	ES4M07	HN16	0.171633986928105
14Deg	hybrid	ES4M07	I14	0.294791666666666
14Deg	hybrid	ES4M07	L-1374	0.522774327122153
14Deg	hybrid	ES4M07	NC-02	0.558065940535767
14Deg	hybrid	ES4M07	NPA03.1	0.235625761885412
14Deg	hybrid	ES4M07	CLIB1071	0.395796064400716
14Deg	hybrid	ES4M07	HN10	0.4075
14Deg	hybrid	ES4M07	S1278b	0.359730848861283
14Deg	hybrid	ES4M07	Sample_40	0.370829120323559
14Deg	hybrid	ES4M07	T7	0.398049964054637
14Deg	hybrid	ES4M07	UC8	0.381168462847419
14Deg	hybrid	ES4M07	UCD_05-780	0.348621922996002
14Deg	hybrid	ES4M07	UCD_09-448	0.379183278965809
14Deg	hybrid	ES4M07	WE372_1	0.497252747252747
14Deg	hybrid	ES4M07	Y12	0.277441817848635
14Deg	hybrid	ES4M07	YJM326	0.414634146341463
14Deg	hybrid	ES4M07	YJM421	0.259412550066756
14Deg	hybrid	ES4M07	YJM434	0.354430997462424
14Deg	hybrid	ES4M07	YJM627	0.275835866261399
14Deg	hybrid	ES4M07	YJM990	0.544332210998878
14Deg	hybrid	ES4M07	YPS133	0.322693096377307
14Deg	hybrid	ES4M07	YPS141	0.307700399747528
14Deg	hybrid	ES4M07	YPS142	0.248786097623307
14Deg	hybrid	ES4M07	YPS143	0.325194174757282
14Deg	hybrid	ES4M07	YPS163	0.223928377645144
14Deg	hybrid	ES4M07	YPS615	0.222231715652769
14Deg	hybrid	ES4M07	YPS617	0.206355120289547
14Deg	hybrid	ES4M07	ZP_611	0.385897435897436
14Deg	hybrid	EXF-5247	1560	0.258094357076781
14Deg	hybrid	EXF-5247	2162	0.314213643342839
14Deg	hybrid	EXF-5247	2187	0.376518218623482
14Deg	hybrid	EXF-5247	BJ20	0.182194616977226
14Deg	hybrid	EXF-5247	CECT10109	0.232380385149891
14Deg	hybrid	EXF-5247	CLIB1410	0.310332950631458
14Deg	hybrid	EXF-5247	CLIB154	0.318840579710145
14Deg	hybrid	EXF-5247	CLIB382	0.220595533498759
14Deg	hybrid	EXF-5247	CLIB413	0.267045454545455
14Deg	hybrid	EXF-5247	CLIB485	0.291044776119403
14Deg	hybrid	EXF-5247	CLQCA_04-021	0.368961352657005
14Deg	hybrid	EXF-5247	CLQCA_10-027	0.210549645390071
14Deg	hybrid	EXF-5247	CLQCA_20-184	0.208711433756806
14Deg	hybrid	EXF-5247	CLQCA_20-246	0.223456790123457
14Deg	hybrid	EXF-5247	CLQCA_20-259	0.181840193704601
14Deg	hybrid	EXF-5247	DBVPG1058	0.400025601638505
14Deg	hybrid	EXF-5247	DBVPG1564	0.45
14Deg	hybrid	EXF-5247	DBVPG2088	0.395161290322581
14Deg	hybrid	EXF-5247	DBVPG3591	0.396969696969697
14Deg	hybrid	EXF-5247	ES4M07	0.157635467980295
14Deg	hybrid	EXF-5247	EXF-5247	0.342750533049041
14Deg	hybrid	EXF-5247	EXF-5248	0.34484126984127
14Deg	hybrid	EXF-5247	EXF-5295	0.320512820512821
14Deg	hybrid	EXF-5247	EXF-5297	0.29140350877193
14Deg	hybrid	EXF-5247	EXF-7197	0.357118758434548
14Deg	hybrid	EXF-5247	FY	0.173809523809524
14Deg	hybrid	EXF-5247	HN15	0.132575757575758
14Deg	hybrid	EXF-5247	HN16	0.190609622744669
14Deg	hybrid	EXF-5247	I14	0.31214915797915
14Deg	hybrid	EXF-5247	L-1374	0.466666666666667
14Deg	hybrid	EXF-5247	NC-02	0.462233169129721
14Deg	hybrid	EXF-5247	NPA03.1	0.18288027761712
14Deg	hybrid	EXF-5247	CLIB1071	0.410493827160494
14Deg	hybrid	EXF-5247	HN10	0.307103490508267
14Deg	hybrid	EXF-5247	S1278b	0.224014336917563
14Deg	hybrid	EXF-5247	Sample_40	0.366435185185185
14Deg	hybrid	EXF-5247	T7	0.390712682379349
14Deg	hybrid	EXF-5247	UC8	0.33578431372549
14Deg	hybrid	EXF-5247	UCD_05-780	0.348913043478261
14Deg	hybrid	EXF-5247	UCD_09-448	0.296341463414634
14Deg	hybrid	EXF-5247	WE372_1	0.46981981981982
14Deg	hybrid	EXF-5247	Y12	0.26530612244898
14Deg	hybrid	EXF-5247	YJM326	0.336193647540983
14Deg	hybrid	EXF-5247	YJM421	0.264161392405064
14Deg	hybrid	EXF-5247	YJM434	0.294444444444445
14Deg	hybrid	EXF-5247	YJM627	0.288292736449419
14Deg	hybrid	EXF-5247	YJM990	0.492307692307692
14Deg	hybrid	EXF-5247	YPS133	0.309583333333334
14Deg	hybrid	EXF-5247	YPS141	0.362962962962963
14Deg	hybrid	EXF-5247	YPS142	0.300119739993158
14Deg	hybrid	EXF-5247	YPS143	0.327991931869117
14Deg	hybrid	EXF-5247	YPS163	0.317412507171543
14Deg	hybrid	EXF-5247	YPS615	0.18965625
14Deg	hybrid	EXF-5247	YPS617	0.200840336134454
14Deg	hybrid	EXF-5247	ZP_611	0.241666666666667
14Deg	hybrid	EXF-5248	1560	0.247451241134752
14Deg	hybrid	EXF-5248	2162	0.357125603864735
14Deg	hybrid	EXF-5248	2187	0.39277108433735
14Deg	hybrid	EXF-5248	BJ20	0.175502606105733
14Deg	hybrid	EXF-5248	CECT10109	0.181859931113663
14Deg	hybrid	EXF-5248	CLIB1410	0.333333333333333
14Deg	hybrid	EXF-5248	CLIB154	0.328537936913896
14Deg	hybrid	EXF-5248	CLIB382	0.1935987509758
14Deg	hybrid	EXF-5248	CLIB413	0.290322580645161
14Deg	hybrid	EXF-5248	CLIB485	0.323599394332685
14Deg	hybrid	EXF-5248	CLQCA_04-021	0.378874856486797
14Deg	hybrid	EXF-5248	CLQCA_10-027	0.244897959183673
14Deg	hybrid	EXF-5248	CLQCA_20-184	0.200905902980713
14Deg	hybrid	EXF-5248	CLQCA_20-246	0.202834799608993
14Deg	hybrid	EXF-5248	CLQCA_20-259	0.16869918699187
14Deg	hybrid	EXF-5248	DBVPG1058	0.398412698412699
14Deg	hybrid	EXF-5248	DBVPG1564	0.49104320337197
14Deg	hybrid	EXF-5248	DBVPG2088	0.451153324287653
14Deg	hybrid	EXF-5248	DBVPG3591	0.398529411764706
14Deg	hybrid	EXF-5248	ES4M07	0.209975369458129
14Deg	hybrid	EXF-5248	EXF-5247	0.382783882783883
14Deg	hybrid	EXF-5248	EXF-5248	0.371428571428572
14Deg	hybrid	EXF-5248	EXF-5295	0.347222222222222
14Deg	hybrid	EXF-5248	EXF-5297	0.322278298485941
14Deg	hybrid	EXF-5248	EXF-7197	0.356003752345216
14Deg	hybrid	EXF-5248	FY	0.191938775510204
14Deg	hybrid	EXF-5248	HN15	0.0919553728714034
14Deg	hybrid	EXF-5248	HN16	0.199174603174603
14Deg	hybrid	EXF-5248	I14	0.276439645625692
14Deg	hybrid	EXF-5248	L-1374	0.486503452605148
14Deg	hybrid	EXF-5248	NC-02	0.474611708482676
14Deg	hybrid	EXF-5248	NPA03.1	0.15587044534413
14Deg	hybrid	EXF-5248	CLIB1071	0.40878164556962
14Deg	hybrid	EXF-5248	HN10	0.337471600129828
14Deg	hybrid	EXF-5248	S1278b	0.214598141060689
14Deg	hybrid	EXF-5248	Sample_40	0.435064935064935
14Deg	hybrid	EXF-5248	T7	0.448815253609774
14Deg	hybrid	EXF-5248	UC8	0.34283196239718
14Deg	hybrid	EXF-5248	UCD_05-780	0.288443616029823
14Deg	hybrid	EXF-5248	UCD_09-448	0.303214523650899
14Deg	hybrid	EXF-5248	WE372_1	0.49285568483364
14Deg	hybrid	EXF-5248	Y12	0.284210526315789
14Deg	hybrid	EXF-5248	YJM326	0.384024577572965
14Deg	hybrid	EXF-5248	YJM421	0.320750237416905
14Deg	hybrid	EXF-5248	YJM434	0.321633825944171
14Deg	hybrid	EXF-5248	YJM627	0.281414141414142
14Deg	hybrid	EXF-5248	YJM990	0.461538461538462
14Deg	hybrid	EXF-5248	YPS133	0.387299465240642
14Deg	hybrid	EXF-5248	YPS141	0.409953703703703
14Deg	hybrid	EXF-5248	YPS142	0.333333333333334
14Deg	hybrid	EXF-5248	YPS143	0.356725146198831
14Deg	hybrid	EXF-5248	YPS163	0.36357625624449
14Deg	hybrid	EXF-5248	YPS615	0.224035812672177
14Deg	hybrid	EXF-5248	YPS617	0.212549603174603
14Deg	hybrid	EXF-5248	ZP_611	0.236182669789227
14Deg	hybrid	EXF-5295	1560	0.275378787878788
14Deg	hybrid	EXF-5295	2162	0.422214897824654
14Deg	hybrid	EXF-5295	2187	0.375770853618955
14Deg	hybrid	EXF-5295	BJ20	0.153010033444816
14Deg	hybrid	EXF-5295	CECT10109	0.30813029661017
14Deg	hybrid	EXF-5295	CLIB1410	0.330729166666667
14Deg	hybrid	EXF-5295	CLIB154	0.348155467720686
14Deg	hybrid	EXF-5295	CLIB382	0.216351501668521
14Deg	hybrid	EXF-5295	CLIB413	0.286525307797538
14Deg	hybrid	EXF-5295	CLIB485	0.378409090909091
14Deg	hybrid	EXF-5295	CLQCA_04-021	0.398892773892774
14Deg	hybrid	EXF-5295	CLQCA_10-027	0.213371266002845
14Deg	hybrid	EXF-5295	CLQCA_20-184	0.237065120428189
14Deg	hybrid	EXF-5295	CLQCA_20-246	0.161430119176598
14Deg	hybrid	EXF-5295	CLQCA_20-259	0.163587623538531
14Deg	hybrid	EXF-5295	DBVPG1058	0.388679245283019
14Deg	hybrid	EXF-5295	DBVPG1564	0.510976129582268
14Deg	hybrid	EXF-5295	DBVPG2088	0.516954022988506
14Deg	hybrid	EXF-5295	DBVPG3591	0.462653288740246
14Deg	hybrid	EXF-5295	ES4M07	0.163190996358822
14Deg	hybrid	EXF-5295	EXF-5247	0.430952380952381
14Deg	hybrid	EXF-5295	EXF-5248	0.4140625
14Deg	hybrid	EXF-5295	EXF-5295	0.412550403225807
14Deg	hybrid	EXF-5295	EXF-5297	0.36751027471339
14Deg	hybrid	EXF-5295	EXF-7197	0.350054696046257
14Deg	hybrid	EXF-5295	FY	0.201300236406619
14Deg	hybrid	EXF-5295	HN15	0.117030965391621
14Deg	hybrid	EXF-5295	HN16	0.213932203389831
14Deg	hybrid	EXF-5295	I14	0.293790626069107
14Deg	hybrid	EXF-5295	L-1374	0.635217391304348
14Deg	hybrid	EXF-5295	NC-02	0.57051282051282
14Deg	hybrid	EXF-5295	NPA03.1	0.173623063683305
14Deg	hybrid	EXF-5295	CLIB1071	0.426809477442389
14Deg	hybrid	EXF-5295	HN10	0.358082191780822
14Deg	hybrid	EXF-5295	S1278b	0.219341974077767
14Deg	hybrid	EXF-5295	Sample_40	0.472704714640199
14Deg	hybrid	EXF-5295	T7	0.482876712328767
14Deg	hybrid	EXF-5295	UC8	0.31592039800995
14Deg	hybrid	EXF-5295	UCD_05-780	0.304019457245264
14Deg	hybrid	EXF-5295	UCD_09-448	0.386274509803922
14Deg	hybrid	EXF-5295	WE372_1	0.476310483870968
14Deg	hybrid	EXF-5295	Y12	0.293512938674229
14Deg	hybrid	EXF-5295	YJM326	0.436259143155695
14Deg	hybrid	EXF-5295	YJM421	0.377594986290639
14Deg	hybrid	EXF-5295	YJM434	0.352564102564102
14Deg	hybrid	EXF-5295	YJM627	0.306020066889632
14Deg	hybrid	EXF-5295	YJM990	0.504716981132076
14Deg	hybrid	EXF-5295	YPS133	0.38008032128514
14Deg	hybrid	EXF-5295	YPS141	0.478856462179869
14Deg	hybrid	EXF-5295	YPS142	0.35622753555243
14Deg	hybrid	EXF-5295	YPS143	0.408860759493671
14Deg	hybrid	EXF-5295	YPS163	0.366234167438987
14Deg	hybrid	EXF-5295	YPS615	0.236842105263158
14Deg	hybrid	EXF-5295	YPS617	0.239477401129944
14Deg	hybrid	EXF-5295	ZP_611	0.206896551724138
14Deg	hybrid	EXF-5297	1560	0.261792452830189
14Deg	hybrid	EXF-5297	2162	0.362570979823608
14Deg	hybrid	EXF-5297	2187	0.349117399831886
14Deg	hybrid	EXF-5297	BJ20	0.128345916266301
14Deg	hybrid	EXF-5297	CECT10109	0.264979450573221
14Deg	hybrid	EXF-5297	CLIB1410	0.357324716020369
14Deg	hybrid	EXF-5297	CLIB154	0.323809523809524
14Deg	hybrid	EXF-5297	CLIB382	0.185634000702493
14Deg	hybrid	EXF-5297	CLIB413	0.301214574898786
14Deg	hybrid	EXF-5297	CLIB485	0.35529738165424
14Deg	hybrid	EXF-5297	CLQCA_04-021	0.409459459459459
14Deg	hybrid	EXF-5297	CLQCA_10-027	0.228904428904429
14Deg	hybrid	EXF-5297	CLQCA_20-184	0.210030891181442
14Deg	hybrid	EXF-5297	CLQCA_20-246	0.156869446343131
14Deg	hybrid	EXF-5297	CLQCA_20-259	0.173506611947104
14Deg	hybrid	EXF-5297	DBVPG1058	0.372431506849315
14Deg	hybrid	EXF-5297	DBVPG1564	0.49000761324705
14Deg	hybrid	EXF-5297	DBVPG2088	0.458978328173375
14Deg	hybrid	EXF-5297	DBVPG3591	0.421266968325792
14Deg	hybrid	EXF-5297	ES4M07	0.156288156288157
14Deg	hybrid	EXF-5297	EXF-5247	0.428619909502262
14Deg	hybrid	EXF-5297	EXF-5248	0.443665158371041
14Deg	hybrid	EXF-5297	EXF-5295	0.368329868329869
14Deg	hybrid	EXF-5297	EXF-5297	0.341991341991342
14Deg	hybrid	EXF-5297	EXF-7197	0.31214915797915
14Deg	hybrid	EXF-5297	FY	0.164204996034893
14Deg	hybrid	EXF-5297	HN15	0.0946348733233979
14Deg	hybrid	EXF-5297	HN16	0.197037037037037
14Deg	hybrid	EXF-5297	I14	0.25964590964591
14Deg	hybrid	EXF-5297	L-1374	0.543103448275862
14Deg	hybrid	EXF-5297	NC-02	0.519969278033794
14Deg	hybrid	EXF-5297	NPA03.1	0.161732192636739
14Deg	hybrid	EXF-5297	CLIB1071	0.394117647058824
14Deg	hybrid	EXF-5297	HN10	0.320189701897019
14Deg	hybrid	EXF-5297	S1278b	0.222052768034162
14Deg	hybrid	EXF-5297	Sample_40	0.44804318488529
14Deg	hybrid	EXF-5297	T7	0.403545892309938
14Deg	hybrid	EXF-5297	UC8	0.310334982870194
14Deg	hybrid	EXF-5297	UCD_05-780	0.3
14Deg	hybrid	EXF-5297	UCD_09-448	0.33440170940171
14Deg	hybrid	EXF-5297	WE372_1	0.449968730456536
14Deg	hybrid	EXF-5297	Y12	0.280625
14Deg	hybrid	EXF-5297	YJM326	0.425529542920848
14Deg	hybrid	EXF-5297	YJM421	0.322012257405516
14Deg	hybrid	EXF-5297	YJM434	0.340350877192983
14Deg	hybrid	EXF-5297	YJM627	0.28718856863703
14Deg	hybrid	EXF-5297	YJM990	0.504601990049752
14Deg	hybrid	EXF-5297	YPS133	0.347538301353563
14Deg	hybrid	EXF-5297	YPS141	0.397530864197531
14Deg	hybrid	EXF-5297	YPS142	0.317484222604705
14Deg	hybrid	EXF-5297	YPS143	0.406785075389727
14Deg	hybrid	EXF-5297	YPS163	0.323710237904304
14Deg	hybrid	EXF-5297	YPS615	0.197350771294433
14Deg	hybrid	EXF-5297	YPS617	0.184563758389261
14Deg	hybrid	EXF-5297	ZP_611	0.196086807928914
14Deg	hybrid	EXF-7197	1560	0.349782818532818
14Deg	hybrid	EXF-7197	2162	0.235231539424281
14Deg	hybrid	EXF-7197	2187	0.322510822510823
14Deg	hybrid	EXF-7197	BJ20	0.280272108843537
14Deg	hybrid	EXF-7197	CECT10109	0.337719298245614
14Deg	hybrid	EXF-7197	CLIB1410	0.388510223953262
14Deg	hybrid	EXF-7197	CLIB154	0.428643724696356
14Deg	hybrid	EXF-7197	CLIB382	0.335805608532881
14Deg	hybrid	EXF-7197	CLIB413	0.330174800969194
14Deg	hybrid	EXF-7197	CLIB485	0.400890143291359
14Deg	hybrid	EXF-7197	CLQCA_04-021	0.36707733941034
14Deg	hybrid	EXF-7197	CLQCA_10-027	0.394704433497537
14Deg	hybrid	EXF-7197	CLQCA_20-184	0.269234531670335
14Deg	hybrid	EXF-7197	CLQCA_20-246	0.310121345835632
14Deg	hybrid	EXF-7197	CLQCA_20-259	0.197622779519332
14Deg	hybrid	EXF-7197	DBVPG1058	0.381578947368421
14Deg	hybrid	EXF-7197	DBVPG1564	0.363636363636364
14Deg	hybrid	EXF-7197	DBVPG2088	0.400799418604651
14Deg	hybrid	EXF-7197	DBVPG3591	0.426908023483366
14Deg	hybrid	EXF-7197	ES4M07	0.406462177490215
14Deg	hybrid	EXF-7197	EXF-5247	0.386083743842365
14Deg	hybrid	EXF-7197	EXF-5248	0.356030701754386
14Deg	hybrid	EXF-7197	EXF-5295	0.387361466325661
14Deg	hybrid	EXF-7197	EXF-5297	0.372427101200686
14Deg	hybrid	EXF-7197	EXF-7197	0.314336372847012
14Deg	hybrid	EXF-7197	FY	0.32265625
14Deg	hybrid	EXF-7197	HN15	0.165506180566422
14Deg	hybrid	EXF-7197	HN16	0.173762077294686
14Deg	hybrid	EXF-7197	I14	0.343848746576786
14Deg	hybrid	EXF-7197	L-1374	0.43767325017325
14Deg	hybrid	EXF-7197	NC-02	0.577719437289479
14Deg	hybrid	EXF-7197	NPA03.1	0.21857040229885
14Deg	hybrid	EXF-7197	CLIB1071	0.292156862745098
14Deg	hybrid	EXF-7197	HN10	0.286221788799109
14Deg	hybrid	EXF-7197	S1278b	0.318814277071991
14Deg	hybrid	EXF-7197	Sample_40	0.317627494456763
14Deg	hybrid	EXF-7197	T7	0.302757916241063
14Deg	hybrid	EXF-7197	UC8	0.358823529411765
14Deg	hybrid	EXF-7197	UCD_05-780	0.258041958041959
14Deg	hybrid	EXF-7197	UCD_09-448	0.286931818181818
14Deg	hybrid	EXF-7197	WE372_1	0.371255060728745
14Deg	hybrid	EXF-7197	Y12	0.317290322580645
14Deg	hybrid	EXF-7197	YJM326	0.42071992976295
14Deg	hybrid	EXF-7197	YJM421	0.268443544759335
14Deg	hybrid	EXF-7197	YJM434	0.358489304812834
14Deg	hybrid	EXF-7197	YJM627	0.203393999016233
14Deg	hybrid	EXF-7197	YJM990	0.327337662337663
14Deg	hybrid	EXF-7197	YPS133	0.242308721241306
14Deg	hybrid	EXF-7197	YPS141	0.308187134502924
14Deg	hybrid	EXF-7197	YPS142	0.278724654716426
14Deg	hybrid	EXF-7197	YPS143	0.284366576819407
14Deg	hybrid	EXF-7197	YPS163	0.315450035435861
14Deg	hybrid	EXF-7197	YPS615	0.22712643678161
14Deg	hybrid	EXF-7197	YPS617	0.238450604122246
14Deg	hybrid	EXF-7197	ZP_611	0.315343781597573
14Deg	hybrid	FY	1560	0.234515484515484
14Deg	hybrid	FY	2162	0.248538695347206
14Deg	hybrid	FY	2187	0.242785093863828
14Deg	hybrid	FY	BJ20	0.168238993710692
14Deg	hybrid	FY	CECT10109	0.383329829724616
14Deg	hybrid	FY	CLIB1410	0.256643010397756
14Deg	hybrid	FY	CLIB154	0.48754222972973
14Deg	hybrid	FY	CLIB382	0.144490644490645
14Deg	hybrid	FY	CLIB413	0.256949806949807
14Deg	hybrid	FY	CLIB485	0.278539107950873
14Deg	hybrid	FY	CLQCA_04-021	0.228713768115942
14Deg	hybrid	FY	CLQCA_10-027	0.192145593869732
14Deg	hybrid	FY	CLQCA_20-184	0.222718253968254
14Deg	hybrid	FY	CLQCA_20-246	0.158734602463606
14Deg	hybrid	FY	CLQCA_20-259	0.137239583333334
14Deg	hybrid	FY	DBVPG1058	0.289408866995074
14Deg	hybrid	FY	DBVPG1564	0.381818181818182
14Deg	hybrid	FY	DBVPG2088	0.298334634400209
14Deg	hybrid	FY	DBVPG3591	0.418632643235435
14Deg	hybrid	FY	ES4M07	0.195852810739542
14Deg	hybrid	FY	EXF-5247	0.25462962962963
14Deg	hybrid	FY	EXF-5248	0.22703366058906
14Deg	hybrid	FY	EXF-5295	0.267045454545455
14Deg	hybrid	FY	EXF-5297	0.278666985188725
14Deg	hybrid	FY	EXF-7197	0.254343758353382
14Deg	hybrid	FY	FY	0.212152209492636
14Deg	hybrid	FY	HN15	0.194084821428572
14Deg	hybrid	FY	HN16	0.204941860465116
14Deg	hybrid	FY	I14	0.256949806949807
14Deg	hybrid	FY	L-1374	0.293387837062536
14Deg	hybrid	FY	NC-02	0.333487768717569
14Deg	hybrid	FY	NPA03.1	0.151461988304094
14Deg	hybrid	FY	CLIB1071	0.33139534883721
14Deg	hybrid	FY	HN10	0.308581504702195
14Deg	hybrid	FY	S1278b	0.2375
14Deg	hybrid	FY	Sample_40	0.232132728304028
14Deg	hybrid	FY	T7	0.25513698630137
14Deg	hybrid	FY	UC8	0.336290322580645
14Deg	hybrid	FY	UCD_05-780	0.221393791844188
14Deg	hybrid	FY	UCD_09-448	0.201063829787234
14Deg	hybrid	FY	WE372_1	0.386723163841808
14Deg	hybrid	FY	Y12	0.348373685497677
14Deg	hybrid	FY	YJM326	0.314393939393939
14Deg	hybrid	FY	YJM421	0.273943485871468
14Deg	hybrid	FY	YJM434	0.293103448275862
14Deg	hybrid	FY	YJM627	0.248595505617978
14Deg	hybrid	FY	YJM990	0.330471380471381
14Deg	hybrid	FY	YPS133	0.241568776051535
14Deg	hybrid	FY	YPS141	0.218951499859826
14Deg	hybrid	FY	YPS142	0.240262172284644
14Deg	hybrid	FY	YPS143	0.214358108108108
14Deg	hybrid	FY	YPS163	0.236437246963563
14Deg	hybrid	FY	YPS615	0.226614495721495
14Deg	hybrid	FY	YPS617	0.201581645411352
14Deg	hybrid	FY	ZP_611	0.187629399585921
14Deg	hybrid	HN15	1560	0.204347826086957
14Deg	hybrid	HN15	2162	0.176632653061225
14Deg	hybrid	HN15	2187	0.262448812448812
14Deg	hybrid	HN15	BJ20	0.131735159817352
14Deg	hybrid	HN15	CECT10109	0.221698113207548
14Deg	hybrid	HN15	CLIB1410	0.25
14Deg	hybrid	HN15	CLIB154	0.256308975202985
14Deg	hybrid	HN15	CLIB382	0.169340463458111
14Deg	hybrid	HN15	CLIB413	0.218869731800766
14Deg	hybrid	HN15	CLIB485	0.276844262295082
14Deg	hybrid	HN15	CLQCA_04-021	0.225458576899819
14Deg	hybrid	HN15	CLQCA_10-027	0.174859211584876
14Deg	hybrid	HN15	CLQCA_20-184	0.25
14Deg	hybrid	HN15	CLQCA_20-246	0.138690476190477
14Deg	hybrid	HN15	CLQCA_20-259	0.115748427672956
14Deg	hybrid	HN15	DBVPG1058	0.277812075564885
14Deg	hybrid	HN15	DBVPG1564	0.234782608695652
14Deg	hybrid	HN15	DBVPG2088	0.303870387038704
14Deg	hybrid	HN15	DBVPG3591	0.260385385385385
14Deg	hybrid	HN15	ES4M07	0.139830508474576
14Deg	hybrid	HN15	EXF-5247	0.283267020335986
14Deg	hybrid	HN15	EXF-5248	0.264957264957265
14Deg	hybrid	HN15	EXF-5295	0.262374860956619
14Deg	hybrid	HN15	EXF-5297	0.257515473032714
14Deg	hybrid	HN15	EXF-7197	0.284962406015038
14Deg	hybrid	HN15	FY	0.176732481610531
14Deg	hybrid	HN15	HN15	0.181859931113663
14Deg	hybrid	HN15	HN16	0.184873949579832
14Deg	hybrid	HN15	I14	0.232280431432974
14Deg	hybrid	HN15	L-1374	0.231931374431855
14Deg	hybrid	HN15	NC-02	0.283666296707362
14Deg	hybrid	HN15	NPA03.1	0.137565217391305
14Deg	hybrid	HN15	CLIB1071	0.226813590449954
14Deg	hybrid	HN15	HN10	0.176116838487973
14Deg	hybrid	HN15	S1278b	0.229967948717949
14Deg	hybrid	HN15	Sample_40	0.245190529041806
14Deg	hybrid	HN15	T7	0.242538394668213
14Deg	hybrid	HN15	UC8	0.219601677148847
14Deg	hybrid	HN15	UCD_05-780	0.260579907638731
14Deg	hybrid	HN15	UCD_09-448	0.207026397515528
14Deg	hybrid	HN15	WE372_1	0.260889292196007
14Deg	hybrid	HN15	Y12	0.304166666666666
14Deg	hybrid	HN15	YJM326	0.377492877492878
14Deg	hybrid	HN15	YJM421	0.277592641962144
14Deg	hybrid	HN15	YJM434	0.247047244094488
14Deg	hybrid	HN15	YJM627	0.16604379753475
14Deg	hybrid	HN15	YJM990	0.254807692307693
14Deg	hybrid	HN15	YPS133	0.193783015034539
14Deg	hybrid	HN15	YPS141	0.226991758241759
14Deg	hybrid	HN15	YPS142	0.226322604513504
14Deg	hybrid	HN15	YPS143	0.231981549106285
14Deg	hybrid	HN15	YPS163	0.23811844077961
14Deg	hybrid	HN15	YPS615	0.248191537033481
14Deg	hybrid	HN15	YPS617	0.201598845945784
14Deg	hybrid	HN15	ZP_611	0.184663473248356
14Deg	hybrid	HN16	1560	0.194990250487476
14Deg	hybrid	HN16	2162	0.18126022913257
14Deg	hybrid	HN16	2187	0.266364052487031
14Deg	hybrid	HN16	BJ20	0.119254658385093
14Deg	hybrid	HN16	CECT10109	0.235926628716003
14Deg	hybrid	HN16	CLIB1410	0.26505016722408
14Deg	hybrid	HN16	CLIB154	0.220492320639596
14Deg	hybrid	HN16	CLIB382	0.163522012578617
14Deg	hybrid	HN16	CLIB413	0.229257915154549
14Deg	hybrid	HN16	CLIB485	0.252066680330668
14Deg	hybrid	HN16	CLQCA_04-021	0.21077091306725
14Deg	hybrid	HN16	CLQCA_10-027	0.181426332288402
14Deg	hybrid	HN16	CLQCA_20-184	0.246031746031746
14Deg	hybrid	HN16	CLQCA_20-246	0.132558139534884
14Deg	hybrid	HN16	CLQCA_20-259	0.127982976136191
14Deg	hybrid	HN16	DBVPG1058	0.263440860215054
14Deg	hybrid	HN16	DBVPG1564	0.240160183066362
14Deg	hybrid	HN16	DBVPG2088	0.267997801795201
14Deg	hybrid	HN16	DBVPG3591	0.267077315208156
14Deg	hybrid	HN16	ES4M07	0.154252837816825
14Deg	hybrid	HN16	EXF-5247	0.299532710280374
14Deg	hybrid	HN16	EXF-5248	0.255590411840412
14Deg	hybrid	HN16	EXF-5295	0.262013729977117
14Deg	hybrid	HN16	EXF-5297	0.287672305764411
14Deg	hybrid	HN16	EXF-7197	0.275543900543901
14Deg	hybrid	HN16	FY	0.169948737184296
14Deg	hybrid	HN16	HN15	0.178637734973312
14Deg	hybrid	HN16	HN16	0.206533624931657
14Deg	hybrid	HN16	I14	0.200809412550067
14Deg	hybrid	HN16	L-1374	0.229560319767442
14Deg	hybrid	HN16	NC-02	0.267741935483871
14Deg	hybrid	HN16	NPA03.1	0.149170731707317
14Deg	hybrid	HN16	CLIB1071	0.190488188976378
14Deg	hybrid	HN16	HN10	0.179388973011491
14Deg	hybrid	HN16	S1278b	0.196143982414361
14Deg	hybrid	HN16	Sample_40	0.270772238514174
14Deg	hybrid	HN16	T7	0.23811844077961
14Deg	hybrid	HN16	UC8	0.203771805752004
14Deg	hybrid	HN16	UCD_05-780	0.249944225477802
14Deg	hybrid	HN16	UCD_09-448	0.210672210672211
14Deg	hybrid	HN16	WE372_1	0.233031674208145
14Deg	hybrid	HN16	Y12	0.273504273504274
14Deg	hybrid	HN16	YJM326	0.343495934959349
14Deg	hybrid	HN16	YJM421	0.235297736220473
14Deg	hybrid	HN16	YJM434	0.240247640800625
14Deg	hybrid	HN16	YJM627	0.170138888888889
14Deg	hybrid	HN16	YJM990	0.229357798165138
14Deg	hybrid	HN16	YPS133	0.195475973864859
14Deg	hybrid	HN16	YPS141	0.204498653571995
14Deg	hybrid	HN16	YPS142	0.276894541600424
14Deg	hybrid	HN16	YPS143	0.221347331583552
14Deg	hybrid	HN16	YPS163	0.252336448598131
14Deg	hybrid	HN16	YPS615	0.223548228346457
14Deg	hybrid	HN16	YPS617	0.172944644611857
14Deg	hybrid	HN16	ZP_611	0.159881422924902
14Deg	hybrid	I14	1560	0.346196660482375
14Deg	hybrid	I14	2162	0.257383750638733
14Deg	hybrid	I14	2187	0.248378378378379
14Deg	hybrid	I14	BJ20	0.285996563573883
14Deg	hybrid	I14	CECT10109	0.364916773367478
14Deg	hybrid	I14	CLIB1410	0.38749345892203
14Deg	hybrid	I14	CLIB154	0.363025210084034
14Deg	hybrid	I14	CLIB382	0.4
14Deg	hybrid	I14	CLIB413	0.343684801797464
14Deg	hybrid	I14	CLIB485	0.379796578825705
14Deg	hybrid	I14	CLQCA_04-021	0.387742338961851
14Deg	hybrid	I14	CLQCA_10-027	0.410848348348349
14Deg	hybrid	I14	CLQCA_20-184	0.266889704295273
14Deg	hybrid	I14	CLQCA_20-246	0.302124781155499
14Deg	hybrid	I14	CLQCA_20-259	0.206786202853234
14Deg	hybrid	I14	DBVPG1058	0.544888427607681
14Deg	hybrid	I14	DBVPG1564	0.435394298407997
14Deg	hybrid	I14	DBVPG2088	0.352564102564102
14Deg	hybrid	I14	DBVPG3591	0.344117647058824
14Deg	hybrid	I14	ES4M07	0.288486842105263
14Deg	hybrid	I14	EXF-5247	0.338918918918919
14Deg	hybrid	I14	EXF-5248	0.31953781512605
14Deg	hybrid	I14	EXF-5295	0.338383838383838
14Deg	hybrid	I14	EXF-5297	0.34313725490196
14Deg	hybrid	I14	EXF-7197	0.34108527131783
14Deg	hybrid	I14	FY	0.199602081420264
14Deg	hybrid	I14	HN15	0.146011881573822
14Deg	hybrid	I14	HN16	0.113207547169811
14Deg	hybrid	I14	I14	0.373379099923722
14Deg	hybrid	I14	L-1374	0.381168462847419
14Deg	hybrid	I14	NC-02	0.464278424168198
14Deg	hybrid	I14	NPA03.1	0.25
14Deg	hybrid	I14	CLIB1071	0.301220657276996
14Deg	hybrid	I14	HN10	0.219178082191781
14Deg	hybrid	I14	S1278b	0.378762999452655
14Deg	hybrid	I14	Sample_40	0.284244929347304
14Deg	hybrid	I14	T7	0.322837292693859
14Deg	hybrid	I14	UC8	0.408315177923021
14Deg	hybrid	I14	UCD_05-780	0.321428571428572
14Deg	hybrid	I14	UCD_09-448	0.335227272727273
14Deg	hybrid	I14	WE372_1	0.387748255501879
14Deg	hybrid	I14	Y12	0.292857142857143
14Deg	hybrid	I14	YJM326	0.495398009950249
14Deg	hybrid	I14	YJM421	0.352059925093633
14Deg	hybrid	I14	YJM434	0.406117978407135
14Deg	hybrid	I14	YJM627	0.21086739780658
14Deg	hybrid	I14	YJM990	0.40028464685999
14Deg	hybrid	I14	YPS133	0.286593428949243
14Deg	hybrid	I14	YPS141	0.313131313131313
14Deg	hybrid	I14	YPS142	0.306350267379679
14Deg	hybrid	I14	YPS143	0.280195565349126
14Deg	hybrid	I14	YPS163	0.224937343358396
14Deg	hybrid	I14	YPS615	0.236434108527132
14Deg	hybrid	I14	YPS617	0.254860448473282
14Deg	hybrid	I14	ZP_611	0.312150055991042
14Deg	hybrid	L-1374	1560	0.383815322171487
14Deg	hybrid	L-1374	2162	0.369608885737918
14Deg	hybrid	L-1374	2187	0.430871212121212
14Deg	hybrid	L-1374	BJ20	0.337535928926052
14Deg	hybrid	L-1374	CECT10109	0.436449579831933
14Deg	hybrid	L-1374	CLIB1410	0.451631701631702
14Deg	hybrid	L-1374	CLIB154	0.492332526230831
14Deg	hybrid	L-1374	CLIB382	0.452589897260274
14Deg	hybrid	L-1374	CLIB413	0.379615531023982
14Deg	hybrid	L-1374	CLIB485	0.514202898550725
14Deg	hybrid	L-1374	CLQCA_04-021	0.486738613499177
14Deg	hybrid	L-1374	CLQCA_10-027	0.43684012066365
14Deg	hybrid	L-1374	CLQCA_20-184	0.315128504672897
14Deg	hybrid	L-1374	CLQCA_20-246	0.420289855072464
14Deg	hybrid	L-1374	CLQCA_20-259	0.289929107589658
14Deg	hybrid	L-1374	DBVPG1058	0.603610930383865
14Deg	hybrid	L-1374	DBVPG1564	0.499839743589743
14Deg	hybrid	L-1374	DBVPG2088	0.565375302663438
14Deg	hybrid	L-1374	DBVPG3591	0.53546626984127
14Deg	hybrid	L-1374	ES4M07	0.443008529335746
14Deg	hybrid	L-1374	EXF-5247	0.416494133885439
14Deg	hybrid	L-1374	EXF-5248	0.467178175618074
14Deg	hybrid	L-1374	EXF-5295	0.52090395480226
14Deg	hybrid	L-1374	EXF-5297	0.47972972972973
14Deg	hybrid	L-1374	EXF-7197	0.427400468384075
14Deg	hybrid	L-1374	FY	0.312065275548422
14Deg	hybrid	L-1374	HN15	0.175969355847404
14Deg	hybrid	L-1374	HN16	0.208994708994709
14Deg	hybrid	L-1374	I14	0.382716049382716
14Deg	hybrid	L-1374	L-1374	0.511544011544012
14Deg	hybrid	L-1374	NC-02	0.50786047654139
14Deg	hybrid	L-1374	NPA03.1	0.238636363636364
14Deg	hybrid	L-1374	CLIB1071	0.453333333333334
14Deg	hybrid	L-1374	HN10	0.466078697421981
14Deg	hybrid	L-1374	S1278b	0.372685185185185
14Deg	hybrid	L-1374	Sample_40	0.444491960314745
14Deg	hybrid	L-1374	T7	0.401478232618584
14Deg	hybrid	L-1374	UC8	0.417287784679089
14Deg	hybrid	L-1374	UCD_05-780	0.40123820754717
14Deg	hybrid	L-1374	UCD_09-448	0.413719512195122
14Deg	hybrid	L-1374	WE372_1	0.525155279503106
14Deg	hybrid	L-1374	Y12	0.437969924812031
14Deg	hybrid	L-1374	YJM326	0.525572405590246
14Deg	hybrid	L-1374	YJM421	0.405869324473976
14Deg	hybrid	L-1374	YJM434	0.474646983311939
14Deg	hybrid	L-1374	YJM627	0.340367965367966
14Deg	hybrid	L-1374	YJM990	0.563241106719367
14Deg	hybrid	L-1374	YPS133	0.375058602906704
14Deg	hybrid	L-1374	YPS141	0.382783882783883
14Deg	hybrid	L-1374	YPS142	0.394805194805195
14Deg	hybrid	L-1374	YPS143	0.366260987153482
14Deg	hybrid	L-1374	YPS163	0.394679372642445
14Deg	hybrid	L-1374	YPS615	0.269063706563707
14Deg	hybrid	L-1374	YPS617	0.286700851873295
14Deg	hybrid	L-1374	ZP_611	0.39718309859155
14Deg	hybrid	NC-02	1560	0.372321428571428
14Deg	hybrid	NC-02	2162	0.337078651685393
14Deg	hybrid	NC-02	2187	0.378347986096912
14Deg	hybrid	NC-02	BJ20	0.265119885482524
14Deg	hybrid	NC-02	CECT10109	0.354342431761787
14Deg	hybrid	NC-02	CLIB1410	0.467943448956108
14Deg	hybrid	NC-02	CLIB154	0.460213032581454
14Deg	hybrid	NC-02	CLIB382	0.377456140350877
14Deg	hybrid	NC-02	CLIB413	0.387112887112888
14Deg	hybrid	NC-02	CLIB485	0.471356702369361
14Deg	hybrid	NC-02	CLQCA_04-021	0.446450809464509
14Deg	hybrid	NC-02	CLQCA_10-027	0.443988269794721
14Deg	hybrid	NC-02	CLQCA_20-184	0.292857142857143
14Deg	hybrid	NC-02	CLQCA_20-246	0.39763440860215
14Deg	hybrid	NC-02	CLQCA_20-259	0.257515473032714
14Deg	hybrid	NC-02	DBVPG1058	0.599969751966122
14Deg	hybrid	NC-02	DBVPG1564	0.493901532054143
14Deg	hybrid	NC-02	DBVPG2088	0.436743951612903
14Deg	hybrid	NC-02	DBVPG3591	0.441558441558442
14Deg	hybrid	NC-02	ES4M07	0.388474295190713
14Deg	hybrid	NC-02	EXF-5247	0.445309168443497
14Deg	hybrid	NC-02	EXF-5248	0.496268656716418
14Deg	hybrid	NC-02	EXF-5295	0.460335542667771
14Deg	hybrid	NC-02	EXF-5297	0.45868544600939
14Deg	hybrid	NC-02	EXF-7197	0.405797101449275
14Deg	hybrid	NC-02	FY	0.259703062894553
14Deg	hybrid	NC-02	HN15	0.168300653594772
14Deg	hybrid	NC-02	HN16	0.176930894308943
14Deg	hybrid	NC-02	I14	0.386075949367089
14Deg	hybrid	NC-02	L-1374	0.496268656716418
14Deg	hybrid	NC-02	NC-02	0.507692307692308
14Deg	hybrid	NC-02	NPA03.1	0.231681631748143
14Deg	hybrid	NC-02	CLIB1071	0.467818428184282
14Deg	hybrid	NC-02	HN10	0.424812030075188
14Deg	hybrid	NC-02	S1278b	0.328321678321678
14Deg	hybrid	NC-02	Sample_40	0.361123235850429
14Deg	hybrid	NC-02	T7	0.366512345679012
14Deg	hybrid	NC-02	UC8	0.379101161995899
14Deg	hybrid	NC-02	UCD_05-780	0.320429104477612
14Deg	hybrid	NC-02	UCD_09-448	0.404912597950572
14Deg	hybrid	NC-02	WE372_1	0.52859477124183
14Deg	hybrid	NC-02	Y12	0.417792792792793
14Deg	hybrid	NC-02	YJM326	0.487698195735375
14Deg	hybrid	NC-02	YJM421	0.436379665001469
14Deg	hybrid	NC-02	YJM434	0.452272727272728
14Deg	hybrid	NC-02	YJM627	0.361939174947305
14Deg	hybrid	NC-02	YJM990	0.520270270270271
14Deg	hybrid	NC-02	YPS133	0.422466335931963
14Deg	hybrid	NC-02	YPS141	0.369047619047619
14Deg	hybrid	NC-02	YPS142	0.331140350877193
14Deg	hybrid	NC-02	YPS143	0.361166007905139
14Deg	hybrid	NC-02	YPS163	0.368146718146718
14Deg	hybrid	NC-02	YPS615	0.276643990929705
14Deg	hybrid	NC-02	YPS617	0.272384815995364
14Deg	hybrid	NC-02	ZP_611	0.411036036036036
14Deg	hybrid	NPA03.1	1560	0.286369247046376
14Deg	hybrid	NPA03.1	2162	0.227015437392796
14Deg	hybrid	NPA03.1	2187	0.257075471698113
14Deg	hybrid	NPA03.1	BJ20	0.238705738705739
14Deg	hybrid	NPA03.1	CECT10109	0.260858189429618
14Deg	hybrid	NPA03.1	CLIB1410	0.37997287522604
14Deg	hybrid	NPA03.1	CLIB154	0.355042016806723
14Deg	hybrid	NPA03.1	CLIB382	0.298347398030943
14Deg	hybrid	NPA03.1	CLIB413	0.301567749160135
14Deg	hybrid	NPA03.1	CLIB485	0.372093023255814
14Deg	hybrid	NPA03.1	CLQCA_04-021	0.3125
14Deg	hybrid	NPA03.1	CLQCA_10-027	0.239740082079344
14Deg	hybrid	NPA03.1	CLQCA_20-184	0.257371794871795
14Deg	hybrid	NPA03.1	CLQCA_20-246	0.223171521035599
14Deg	hybrid	NPA03.1	CLQCA_20-259	0.157691796303683
14Deg	hybrid	NPA03.1	DBVPG1058	0.378935185185185
14Deg	hybrid	NPA03.1	DBVPG1564	0.333377378435518
14Deg	hybrid	NPA03.1	DBVPG2088	0.376712328767123
14Deg	hybrid	NPA03.1	DBVPG3591	0.328571428571429
14Deg	hybrid	NPA03.1	ES4M07	0.180363115145724
14Deg	hybrid	NPA03.1	EXF-5247	0.319105691056911
14Deg	hybrid	NPA03.1	EXF-5248	0.344367588932807
14Deg	hybrid	NPA03.1	EXF-5295	0.333369506239827
14Deg	hybrid	NPA03.1	EXF-5297	0.324968845587402
14Deg	hybrid	NPA03.1	EXF-7197	0.306093189964157
14Deg	hybrid	NPA03.1	FY	0.237650844730491
14Deg	hybrid	NPA03.1	HN15	0.155663234403392
14Deg	hybrid	NPA03.1	HN16	0.169196581196581
14Deg	hybrid	NPA03.1	I14	0.314213643342839
14Deg	hybrid	NPA03.1	L-1374	0.356245869134171
14Deg	hybrid	NPA03.1	NC-02	0.394899285250163
14Deg	hybrid	NPA03.1	NPA03.1	0.188591800356507
14Deg	hybrid	NPA03.1	CLIB1071	0.26530612244898
14Deg	hybrid	NPA03.1	HN10	0.224828017510945
14Deg	hybrid	NPA03.1	S1278b	0.377470355731225
14Deg	hybrid	NPA03.1	Sample_40	0.305924695459579
14Deg	hybrid	NPA03.1	T7	0.293003054600993
14Deg	hybrid	NPA03.1	UC8	0.295150987224158
14Deg	hybrid	NPA03.1	UCD_05-780	0.258855981416957
14Deg	hybrid	NPA03.1	UCD_09-448	0.241504854368932
14Deg	hybrid	NPA03.1	WE372_1	0.340659340659341
14Deg	hybrid	NPA03.1	Y12	0.342452043369475
14Deg	hybrid	NPA03.1	YJM326	0.405405405405405
14Deg	hybrid	NPA03.1	YJM421	0.289111207771495
14Deg	hybrid	NPA03.1	YJM434	0.312244062244062
14Deg	hybrid	NPA03.1	YJM627	0.218168964298338
14Deg	hybrid	NPA03.1	YJM990	0.33581850248517
14Deg	hybrid	NPA03.1	YPS133	0.21539027982327
14Deg	hybrid	NPA03.1	YPS141	0.231161616161616
14Deg	hybrid	NPA03.1	YPS142	0.258304913477328
14Deg	hybrid	NPA03.1	YPS143	0.271498771498772
14Deg	hybrid	NPA03.1	YPS163	0.252810407982822
14Deg	hybrid	NPA03.1	YPS615	0.242918961447679
14Deg	hybrid	NPA03.1	YPS617	0.260053790983607
14Deg	hybrid	NPA03.1	ZP_611	0.271196283391405
14Deg	hybrid	CLIB1071	1560	0.340971528471529
14Deg	hybrid	CLIB1071	2162	0.253241800152555
14Deg	hybrid	CLIB1071	2187	0.270979020979021
14Deg	hybrid	CLIB1071	BJ20	0.251506024096386
14Deg	hybrid	CLIB1071	CECT10109	0.316901408450704
14Deg	hybrid	CLIB1071	CLIB1410	0.373397435897436
14Deg	hybrid	CLIB1071	CLIB154	0.565184513006655
14Deg	hybrid	CLIB1071	CLIB382	0.299219620958752
14Deg	hybrid	CLIB1071	CLIB413	0.285610728524828
14Deg	hybrid	CLIB1071	CLIB485	0.410019775873434
14Deg	hybrid	CLIB1071	CLQCA_04-021	0.375
14Deg	hybrid	CLIB1071	CLQCA_10-027	0.240264423076923
14Deg	hybrid	CLIB1071	CLQCA_20-184	0.237305178481649
14Deg	hybrid	CLIB1071	CLQCA_20-246	0.298957557706627
14Deg	hybrid	CLIB1071	CLQCA_20-259	0.159685283687943
14Deg	hybrid	CLIB1071	DBVPG1058	0.457627118644068
14Deg	hybrid	CLIB1071	DBVPG1564	0.44804318488529
14Deg	hybrid	CLIB1071	DBVPG2088	0.418421052631579
14Deg	hybrid	CLIB1071	DBVPG3591	0.408939014202172
14Deg	hybrid	CLIB1071	ES4M07	0.315670289855073
14Deg	hybrid	CLIB1071	EXF-5247	0.304411764705883
14Deg	hybrid	CLIB1071	EXF-5248	0.312932851550738
14Deg	hybrid	CLIB1071	EXF-5295	0.327586206896552
14Deg	hybrid	CLIB1071	EXF-5297	0.331372549019608
14Deg	hybrid	CLIB1071	EXF-7197	0.25
14Deg	hybrid	CLIB1071	FY	0.333314669652856
14Deg	hybrid	CLIB1071	HN15	0.171428571428571
14Deg	hybrid	CLIB1071	HN16	0.176163063909774
14Deg	hybrid	CLIB1071	I14	0.345032840722496
14Deg	hybrid	CLIB1071	L-1374	0.39608636977058
14Deg	hybrid	CLIB1071	NC-02	0.460509950248756
14Deg	hybrid	CLIB1071	NPA03.1	0.245938843764931
14Deg	hybrid	CLIB1071	CLIB1071	0.316882916280507
14Deg	hybrid	CLIB1071	HN10	0.297287818564415
14Deg	hybrid	CLIB1071	S1278b	0.371710526315789
14Deg	hybrid	CLIB1071	Sample_40	0.323643410852713
14Deg	hybrid	CLIB1071	T7	0.303030303030303
14Deg	hybrid	CLIB1071	UC8	0.435597189695551
14Deg	hybrid	CLIB1071	UCD_05-780	0.278888888888889
14Deg	hybrid	CLIB1071	UCD_09-448	0.28416149068323
14Deg	hybrid	CLIB1071	WE372_1	0.395652173913044
14Deg	hybrid	CLIB1071	Y12	0.319444444444445
14Deg	hybrid	CLIB1071	YJM326	0.437978142076503
14Deg	hybrid	CLIB1071	YJM421	0.287878787878788
14Deg	hybrid	CLIB1071	YJM434	0.496764370003807
14Deg	hybrid	CLIB1071	YJM627	0.225970670921663
14Deg	hybrid	CLIB1071	YJM990	0.435081585081585
14Deg	hybrid	CLIB1071	YPS133	0.293560606060606
14Deg	hybrid	CLIB1071	YPS141	0.305176809666334
14Deg	hybrid	CLIB1071	YPS142	0.295296167247387
14Deg	hybrid	CLIB1071	YPS143	0.290556312001556
14Deg	hybrid	CLIB1071	YPS163	0.254413000840572
14Deg	hybrid	CLIB1071	YPS615	0.244047619047619
14Deg	hybrid	CLIB1071	YPS617	0.2648125
14Deg	hybrid	CLIB1071	ZP_611	0.311403508771929
14Deg	hybrid	HN10	1560	0.310377875136911
14Deg	hybrid	HN10	2162	0.252906976744186
14Deg	hybrid	HN10	2187	0.204189001389717
14Deg	hybrid	HN10	BJ20	0.231838914228502
14Deg	hybrid	HN10	CECT10109	0.204166666666667
14Deg	hybrid	HN10	CLIB1410	0.355486083098024
14Deg	hybrid	HN10	CLIB154	0.388048881524441
14Deg	hybrid	HN10	CLIB382	0.307407407407407
14Deg	hybrid	HN10	CLIB413	0.248595848595849
14Deg	hybrid	HN10	CLIB485	0.364524765729585
14Deg	hybrid	HN10	CLQCA_04-021	0.263432383262584
14Deg	hybrid	HN10	CLQCA_10-027	0.192954856361149
14Deg	hybrid	HN10	CLQCA_20-184	0.203404438698557
14Deg	hybrid	HN10	CLQCA_20-246	0.217813051146385
14Deg	hybrid	HN10	CLQCA_20-259	0.0956190476190476
14Deg	hybrid	HN10	DBVPG1058	0.432775919732442
14Deg	hybrid	HN10	DBVPG1564	0.37202380952381
14Deg	hybrid	HN10	DBVPG2088	0.346832191780822
14Deg	hybrid	HN10	DBVPG3591	0.401492537313433
14Deg	hybrid	HN10	ES4M07	0.151898734177216
14Deg	hybrid	HN10	EXF-5247	0.268292682926829
14Deg	hybrid	HN10	EXF-5248	0.286585365853659
14Deg	hybrid	HN10	EXF-5295	0.349698795180723
14Deg	hybrid	HN10	EXF-5297	0.331439393939394
14Deg	hybrid	HN10	EXF-7197	0.231754385964913
14Deg	hybrid	HN10	FY	0.276984126984127
14Deg	hybrid	HN10	HN15	0.149317617866005
14Deg	hybrid	HN10	HN16	0.134126984126984
14Deg	hybrid	HN10	I14	0.289104278074867
14Deg	hybrid	HN10	L-1374	0.288262370540851
14Deg	hybrid	HN10	NC-02	0.324967511371021
14Deg	hybrid	HN10	NPA03.1	0.201359686010654
14Deg	hybrid	HN10	CLIB1071	0.269969666329625
14Deg	hybrid	HN10	HN10	0.298026856673061
14Deg	hybrid	HN10	S1278b	0.398351648351649
14Deg	hybrid	HN10	Sample_40	0.265441512886991
14Deg	hybrid	HN10	T7	0.252808988764045
14Deg	hybrid	HN10	UC8	0.347490347490347
14Deg	hybrid	HN10	UCD_05-780	0.211513157894737
14Deg	hybrid	HN10	UCD_09-448	0.240789473684211
14Deg	hybrid	HN10	WE372_1	0.331140350877193
14Deg	hybrid	HN10	Y12	0.331603131381892
14Deg	hybrid	HN10	YJM326	0.417910447761194
14Deg	hybrid	HN10	YJM421	0.280723355136591
14Deg	hybrid	HN10	YJM434	0.351728320194057
14Deg	hybrid	HN10	YJM627	0.248659346271706
14Deg	hybrid	HN10	YJM990	0.367418142780462
14Deg	hybrid	HN10	YPS133	0.212121212121212
14Deg	hybrid	HN10	YPS141	0.244318181818182
14Deg	hybrid	HN10	YPS142	0.23350545037292
14Deg	hybrid	HN10	YPS143	0.224859943977591
14Deg	hybrid	HN10	YPS163	0.196239806704923
14Deg	hybrid	HN10	YPS615	0.173056722689076
14Deg	hybrid	HN10	YPS617	0.215843813072504
14Deg	hybrid	HN10	ZP_611	0.243376623376624
14Deg	hybrid	S1278b	1560	0.337473652514303
14Deg	hybrid	S1278b	2162	0.374903474903475
14Deg	hybrid	S1278b	2187	0.365245527217358
14Deg	hybrid	S1278b	BJ20	0.252561669829222
14Deg	hybrid	S1278b	CECT10109	0.585
14Deg	hybrid	S1278b	CLIB1410	0.442630597014925
14Deg	hybrid	S1278b	CLIB154	0.637931034482759
14Deg	hybrid	S1278b	CLIB382	0.701374207188161
14Deg	hybrid	S1278b	CLIB413	0.382570295602019
14Deg	hybrid	S1278b	CLIB485	0.413821304436721
14Deg	hybrid	S1278b	CLQCA_04-021	0.381613756613757
14Deg	hybrid	S1278b	CLQCA_10-027	0.31656314699793
14Deg	hybrid	S1278b	CLQCA_20-184	0.280135507408234
14Deg	hybrid	S1278b	CLQCA_20-246	0.305361305361306
14Deg	hybrid	S1278b	CLQCA_20-259	0.180041566103513
14Deg	hybrid	S1278b	DBVPG1058	0.686274509803922
14Deg	hybrid	S1278b	DBVPG1564	0.71984649122807
14Deg	hybrid	S1278b	DBVPG2088	0.613636363636364
14Deg	hybrid	S1278b	DBVPG3591	0.524616626311541
[truncated: 151,609 more rows]
