# Supplementary material for: Extensive impact of low-frequency variants on the phenotypic landscape at population-scale
Source: eLife. 2019 Oct 24;8:e49258. doi: 10.7554/eLife.49258 (PMC6892612; doi:10.7554/eLife.49258)
Supplement: Figure 4—source data 1. [file elife-49258-fig4-data1.xlsx]

## Sheet: Feuil1
SNP	Chr	ChrPos	pvalue	condition	model	MAF
rs290067	16	695617	2.20320433477853e-06	14Deg	Additive	0.240704
rs290069	16	695621	3.01027628048517e-05	5FU100	Additive
rs232728	14	222978	3.0397247785196e-05	5FU100	Additive	0.0237389
rs89950	7	9989	3.17587766765926e-05	5FU100	Additive	0.0433231
rs94964	7	185969	3.65257603401675e-05	5FU100	Additive	0.122632
rs31238	3	264216	4.61508777722095e-05	5FU100	Additive
rs290069	16	695621	9.04533105421963e-07	5FU250	Additive
rs102112	7	467733	1.67223741226814e-06	5FU250	Additive
rs31238	3	264216	1.94456133982283e-06	5FU250	Additive
rs94964	7	185969	5.33875157468901e-06	5FU250	Additive	0.122632
rs253953	15	316412	3.45637653417887e-05	5FU250	Additive
rs208640	13	159862	4.47048843035876e-05	5FU250	Additive	0.195414
rs4693	1	203301	6.78660771004542e-05	5FU250	Additive	0.475922
rs193624	12	613113	8.33101437050096e-05	5FU250	Additive	0.441468
rs25306	3	21165	0.000121108108441722	5FU250	Additive	0.470297
rs290069	16	695621	1.37508099950286e-07	5FU50	Additive
rs31238	3	264216	8.09287548311212e-07	5FU50	Additive
rs94964	7	185969	1.15680596328767e-06	5FU50	Additive	0.122632
rs253953	15	316412	1.49932051980659e-06	5FU50	Additive
rs277805	16	192974	6.19955005193878e-06	5FU50	Additive	0.13986
rs208640	13	159862	1.49317433007452e-05	5FU50	Additive	0.195414
rs174909	11	518122	2.68632897992588e-05	5FU50	Additive	0.0180723
rs102112	7	467733	4.14507145311352e-05	5FU50	Additive
rs88127	6	191937	1.40886796855322e-07	6AU100	Additive	0.221362
rs213557	13	379425	4.54920718758937e-06	6AU100	Additive	0.484143
rs152315	10	391774	3.61702290081635e-05	6AU100	Additive	0.0663366
rs172119	11	402648	4.59884406298373e-05	6AU100	Additive	0.00692384
rs198046	12	801709	6.26653433669042e-05	6AU100	Additive	0.024728
rs198047	12	801710	6.26653433669042e-05	6AU100	Additive	0.024728
rs34717	4	101117	6.34335816569736e-05	6AU100	Additive
rs179285	12	36662	8.02707853934374e-05	6AU100	Additive
rs284020	16	451153	8.45820857626716e-05	6AU100	Additive	0.152087
rs172119	11	402648	4.28949731494558e-15	6AU200	Additive	0.00692384
rs34717	4	101117	9.34949979560182e-15	6AU200	Additive
rs74582	5	212444	2.12133624173511e-14	6AU200	Additive	0.0173267
rs25020	2	803204	2.1842272492484e-14	6AU200	Additive	0.0273605
rs25019	2	803201	2.1842272492484e-14	6AU200	Additive	0.0208556
rs56382	4	955991	2.3205795509431e-12	6AU200	Additive	0.132673
rs87220	6	161167	4.5510525475994e-12	6AU200	Additive	0.157765
rs236486	14	373686	7.74436576147269e-12	6AU200	Additive	0.463127
rs146882	10	189048	2.89288723803421e-11	6AU200	Additive
rs250542	15	189469	3.56467818153955e-11	6AU200	Additive	0.153361
rs263677	15	675329	1.62517884155826e-10	6AU200	Additive	0.112626
rs155011	10	519279	5.81529344992283e-09	6AU200	Additive	0.0792079
rs53357	4	827443	1.55829932280479e-07	6AU200	Additive
rs53355	4	827425	1.55829932280479e-07	6AU200	Additive	0.10796
rs223150	13	758927	1.79308950076057e-07	6AU200	Additive
rs38799	4	271812	5.5907254626136e-07	6AU200	Additive
rs48142	4	607062	6.71374416595115e-07	6AU200	Additive
rs66968	4	1418477	2.61059715167191e-06	6AU200	Additive	0.369673
rs142401	10	29791	5.39377815178485e-06	6AU200	Additive	0.299791
rs78762	5	374815	6.76121789108644e-06	6AU200	Additive	0.251488
rs121407	8	141529	2.35690643535901e-05	6AU200	Additive	0.0281899
rs149186	10	278383	2.40416340629763e-05	6AU200	Additive	0.0143422
rs81728	5	503934	3.23917856435226e-05	6AU200	Additive	0.14096
rs174159	11	489992	3.66092935089353e-05	6AU200	Additive
rs291981	16	787517	4.21083197862567e-05	6AU200	Additive	0.0278054
rs58104	4	1037061	4.90137954089737e-05	6AU200	Additive	0.219524
rs53356	4	827442	7.55624310600708e-05	6AU200	Additive	0.46425
rs28593	3	167074	7.79709310903423e-05	6AU200	Additive	0.0410485
rs88127	6	191937	1.27155753275585e-06	6AU50	Additive	0.221362
rs290067	16	695617	1.02631586851687e-06	Benomyl100	Additive	0.240704
rs292190	16	795139	8.34361601514419e-05	Benomyl100	Additive	0.39165
rs277613	16	185404	4.86635947579685e-12	Benomyl50	Additive	0.184341
rs292788	16	821462	1.52518324812198e-10	Benomyl50	Additive	0.00497018
rs63451	4	1276306	2.44159845548914e-10	Benomyl50	Additive	0.0811078
rs277611	16	185398	4.83042401527728e-10	Benomyl50	Additive
rs277612	16	185401	4.83042401527728e-10	Benomyl50	Additive	0.442842
rs73814	5	182701	8.07989712612249e-10	Benomyl50	Additive	0.22664
rs126809	8	365427	8.61360704305975e-10	Benomyl50	Additive
rs198585	12	814018	1.09688743109062e-09	Benomyl50	Additive	0.0158259
rs18325	2	565601	1.87431231900021e-09	Benomyl50	Additive	0.0688119
rs5959	2	68327	2.37553312031623e-09	Benomyl50	Additive	0.0688119
rs266038	15	770628	3.77166444533907e-09	Benomyl50	Additive	0.351244
rs236481	14	373629	4.1685069630511e-09	Benomyl50	Additive
rs193192	12	592686	5.97896852857119e-09	Benomyl50	Additive	0.206445
rs246908	15	60240	1.89127595333911e-08	Benomyl50	Additive	0.34182
rs290068	16	695619	1.93316759170483e-08	Benomyl50	Additive	0.314459
rs212097	13	310154	2.97123562680003e-08	Benomyl50	Additive
rs293040	16	830701	6.58147630629157e-07	Benomyl50	Additive	0.112438
rs172888	11	439973	2.43021087742378e-06	Benomyl50	Additive	0.481064
rs146882	10	189048	3.76807108671072e-06	Benomyl50	Additive
rs48142	4	607062	1.65918168475701e-05	Benomyl50	Additive
rs250542	15	189469	2.31851448788167e-05	Benomyl50	Additive	0.153361
rs250767	15	200350	4.2745734004168e-05	Benomyl50	Additive
rs244510	14	716711	4.64368225084653e-05	Benomyl50	Additive	0.12248
rs25019	2	803201	4.80279156725266e-05	Benomyl50	Additive	0.0208556
rs25020	2	803204	4.80279156725266e-05	Benomyl50	Additive	0.0273605
rs74582	5	212444	6.96757448084663e-05	Benomyl50	Additive	0.0173267
rs155011	10	519279	7.98663910524804e-05	Benomyl50	Additive	0.0792079
rs25019	2	803201	4.22930386770767e-07	Caf10	Additive	0.0208556
rs25020	2	803204	4.22930386770767e-07	Caf10	Additive	0.0273605
rs172119	11	402648	5.28592162400814e-07	Caf10	Additive	0.00692384
rs87220	6	161167	6.90055930467041e-07	Caf10	Additive	0.157765
rs236486	14	373686	7.63416164332228e-07	Caf10	Additive	0.463127
rs74582	5	212444	7.77396430273719e-07	Caf10	Additive	0.0173267
rs34717	4	101117	1.04420117785261e-06	Caf10	Additive
rs56382	4	955991	1.27471584795254e-06	Caf10	Additive	0.132673
rs155011	10	519279	1.47840894544146e-06	Caf10	Additive	0.0792079
rs38799	4	271812	3.29873101049822e-06	Caf10	Additive
rs263677	15	675329	6.39647074447418e-05	Caf10	Additive	0.112626
rs25020	2	803204	1.24151795666118e-13	Caf20	Additive	0.0273605
rs25019	2	803201	1.24151795666118e-13	Caf20	Additive	0.0208556
rs74582	5	212444	2.3161524482713e-13	Caf20	Additive	0.0173267
rs172119	11	402648	5.40075808261882e-13	Caf20	Additive	0.00692384
rs146882	10	189048	1.1242204553164e-12	Caf20	Additive
rs34717	4	101117	1.29877283851852e-12	Caf20	Additive
rs250542	15	189469	2.01281593900267e-11	Caf20	Additive	0.153361
rs263677	15	675329	4.15787833709981e-11	Caf20	Additive	0.112626
rs87220	6	161167	4.49409693899045e-11	Caf20	Additive	0.157765
rs56382	4	955991	4.51577927924671e-11	Caf20	Additive	0.132673
rs236486	14	373686	9.40622000658348e-11	Caf20	Additive	0.463127
rs28593	3	167074	1.52136684903645e-09	Caf20	Additive	0.0410485
rs89008	6	224599	1.98718108061957e-09	Caf20	Additive	0.0673267
rs149186	10	278383	3.34341791454707e-09	Caf20	Additive	0.0143422
rs182230	12	134269	3.37307116215137e-09	Caf20	Additive
rs58104	4	1037061	6.05565299512771e-09	Caf20	Additive	0.219524
rs121407	8	141529	6.93811094766374e-09	Caf20	Additive	0.0281899
rs155011	10	519279	1.7376716963577e-08	Caf20	Additive	0.0792079
rs80759	5	465018	1.84791598299185e-08	Caf20	Additive	0.246216
rs48569	4	619900	2.49744383719213e-08	Caf20	Additive	0.336816
rs36960	4	193043	2.6443112170822e-08	Caf20	Additive	0.0967262
rs291981	16	787517	4.33319126171676e-08	Caf20	Additive	0.0278054
rs81728	5	503934	4.35402840099933e-08	Caf20	Additive	0.14096
rs223150	13	758927	1.19686978826012e-07	Caf20	Additive
rs129207	8	461762	1.43411611604304e-07	Caf20	Additive	0.21271
rs78762	5	374815	1.58540748942992e-07	Caf20	Additive	0.251488
rs53357	4	827443	2.11972499569425e-07	Caf20	Additive
rs53355	4	827425	2.11972499569425e-07	Caf20	Additive	0.10796
rs38799	4	271812	6.67561772661096e-07	Caf20	Additive
rs142401	10	29791	1.1688425434695e-06	Caf20	Additive	0.299791
rs277613	16	185404	1.41123990408689e-06	Caf20	Additive	0.184341
rs1594	1	71533	2.03381946036003e-06	Caf20	Additive	0.479397
rs1593	1	71531	4.73696265821253e-06	Caf20	Additive
rs236481	14	373629	5.31328207268293e-06	Caf20	Additive
rs266038	15	770628	5.87661586990292e-06	Caf20	Additive	0.351244
rs66968	4	1418477	2.1391604272338e-05	Caf20	Additive	0.369673
rs146882	10	189048	8.71893793596505e-08	Caf40	Additive
rs250542	15	189469	7.25331035534861e-06	Caf40	Additive	0.153361
rs25020	2	803204	8.91948812172541e-06	Caf40	Additive	0.0273605
rs25019	2	803201	8.91948812172541e-06	Caf40	Additive	0.0208556
rs244510	14	716711	9.89463637916369e-06	Caf40	Additive	0.12248
rs74582	5	212444	1.07978090970243e-05	Caf40	Additive	0.0173267
rs34717	4	101117	2.50652916171294e-05	Caf40	Additive
rs66968	4	1418477	2.96271051598358e-05	Caf40	Additive	0.369673
rs87220	6	161167	5.54651484141745e-05	Caf40	Additive	0.157765
rs172119	11	402648	6.61577002972743e-05	Caf40	Additive	0.00692384
rs236486	14	373686	8.65311626053612e-05	Caf40	Additive	0.463127
rs290069	16	695621	3.94389979690471e-05	CHX01	Additive
rs31238	3	264216	6.21910202865528e-05	CHX01	Additive
rs8192	2	152624	9.95665546387258e-08	CuSO401	Additive	0.14492
rs90515	7	20580	1.14542275503468e-07	CuSO401	Additive	0.41001
rs182325	12	138124	3.1661449138172e-06	CuSO401	Additive	0.0390702
rs214836	13	426219	5.530034424112e-06	CuSO401	Additive	0.280318
rs259835	15	520515	7.47915241745655e-06	CuSO401	Additive	0.0944334
rs139352	9	357174	1.3779072541811e-05	CuSO401	Additive	0.297297
rs103116	7	504554	1.94692060508313e-05	CuSO401	Additive	0.160555
rs25306	3	21165	3.07864650576339e-05	CuSO401	Additive	0.470297
rs217905	13	552615	3.48703111836449e-05	CuSO401	Additive	0.343844
rs180633	12	84883	4.69703962922138e-05	CuSO401	Additive	0.278989
rs102664	7	487937	4.98012111641721e-05	CuSO401	Additive	0.0907738
rs206909	13	94898	4.9879051624878e-05	CuSO401	Additive	0.06182
rs10176	2	238287	5.36024227822227e-05	CuSO401	Additive
rs185	1	31391	6.50930790419509e-05	CuSO401	Additive	0.0621212
rs200735	12	897689	6.63556731115747e-05	CuSO401	Additive	0.244554
rs85439	6	88000	6.86746655256514e-05	CuSO401	Additive	0.0668421
rs244510	14	716711	6.17562764954883e-07	CuSO405	Additive	0.12248
rs292788	16	821462	7.77896012846412e-07	CuSO405	Additive	0.00497018
rs126809	8	365427	9.42799942984113e-07	CuSO405	Additive
rs63451	4	1276306	1.81065887247551e-06	CuSO405	Additive	0.0811078
rs212097	13	310154	3.04386907215e-06	CuSO405	Additive
rs73814	5	182701	3.48479315835569e-06	CuSO405	Additive	0.22664
rs18325	2	565601	4.09340444459196e-06	CuSO405	Additive	0.0688119
rs5959	2	68327	4.44381453232333e-06	CuSO405	Additive	0.0688119
rs198585	12	814018	4.90513682959746e-06	CuSO405	Additive	0.0158259
rs193192	12	592686	5.05526861622569e-06	CuSO405	Additive	0.206445
rs4693	1	203301	5.22687764079762e-06	CuSO405	Additive	0.475922
rs293040	16	830701	5.91882593216863e-06	CuSO405	Additive	0.112438
rs246908	15	60240	8.35118758858346e-06	CuSO405	Additive	0.34182
rs224944	13	822608	1.62976756152348e-05	CuSO405	Additive	0.184264
rs89950	7	9989	3.82413668452597e-05	CuSO405	Additive	0.0433231
rs232728	14	222978	4.08234759989902e-05	CuSO405	Additive	0.0237389
rs292190	16	795139	4.84466318646177e-05	CuSO405	Additive	0.39165
rs66968	4	1418477	5.01455124409695e-05	CuSO405	Additive	0.369673
rs8192	2	152624	7.06656414801296e-05	CuSO405	Additive	0.14492
rs280395	16	289053	0.000139360572915028	CuSO405	Additive	0.266402
rs48142	4	607062	1.91538963274219e-08	Fluco10	Additive
rs31238	3	264216	6.04066835426856e-08	Fluco10	Additive
rs253953	15	316412	7.44492022596764e-08	Fluco10	Additive
rs102112	7	467733	2.84505467967482e-07	Fluco10	Additive
rs94964	7	185969	7.96413991941336e-07	Fluco10	Additive	0.122632
rs277805	16	192974	9.04918992323594e-07	Fluco10	Additive	0.13986
rs290069	16	695621	1.13571917193973e-06	Fluco10	Additive
rs208640	13	159862	1.83538743223508e-06	Fluco10	Additive	0.195414
rs224944	13	822608	5.352255440614e-06	Fluco10	Additive	0.184264
rs174909	11	518122	1.26600235751431e-05	Fluco10	Additive	0.0180723
rs178851	12	25386	1.44952443252807e-05	Fluco10	Additive
rs187560	12	339686	2.17547544150472e-05	Fluco10	Additive
rs293040	16	830701	3.54706646145349e-05	Fluco10	Additive	0.112438
rs31238	3	264216	9.19397301634345e-08	Fluco5	Additive
rs253953	15	316412	4.72679186729169e-07	Fluco5	Additive
rs94964	7	185969	1.25313175815517e-06	Fluco5	Additive	0.122632
rs102112	7	467733	1.38192863703647e-06	Fluco5	Additive
rs290069	16	695621	1.74054650112178e-06	Fluco5	Additive
rs178851	12	25386	2.95453394043058e-06	Fluco5	Additive
rs208640	13	159862	5.20322155590809e-06	Fluco5	Additive	0.195414
rs174909	11	518122	8.1925577029304e-06	Fluco5	Additive	0.0180723
rs160423	10	705917	9.07089908654171e-06	Fluco5	Additive	0.142574
rs224944	13	822608	1.01631799552354e-05	Fluco5	Additive	0.184264
rs117619	7	1065445	5.6321729650989e-05	Fluco5	Additive	0.0414172
rs187560	12	339686	5.63300989427362e-05	Fluco5	Additive
rs73814	5	182701	3.42629922623252e-08	Formamide1	Additive	0.22664
rs193192	12	592686	3.51168828507099e-08	Formamide1	Additive	0.206445
rs292788	16	821462	4.57736220877957e-08	Formamide1	Additive	0.00497018
rs198585	12	814018	4.63688000943456e-08	Formamide1	Additive	0.0158259
rs66968	4	1418477	8.69641528900517e-08	Formamide1	Additive	0.369673
rs126809	8	365427	1.42726826672198e-07	Formamide1	Additive
rs293040	16	830701	8.56132083711114e-07	Formamide1	Additive	0.112438
rs5959	2	68327	9.3717069783498e-07	Formamide1	Additive	0.0688119
rs63451	4	1276306	2.28991615700512e-06	Formamide1	Additive	0.0811078
rs246908	15	60240	2.64533920335639e-06	Formamide1	Additive	0.34182
rs18325	2	565601	3.26520997546207e-06	Formamide1	Additive	0.0688119
rs224944	13	822608	3.31584445337009e-06	Formamide1	Additive	0.184264
rs250542	15	189469	7.25457017421123e-06	Formamide1	Additive	0.153361
rs212097	13	310154	1.33307009770924e-05	Formamide1	Additive
rs155011	10	519279	2.26831749268381e-05	Formamide1	Additive	0.0792079
rs25020	2	803204	4.17768710261193e-05	Formamide1	Additive	0.0273605
rs25019	2	803201	4.17768710261193e-05	Formamide1	Additive	0.0208556
rs74582	5	212444	4.91971065897821e-05	Formamide1	Additive	0.0173267
rs253589	15	301306	5.36057966258304e-05	Formamide1	Additive	0.382591
rs253590	15	301308	6.4672396190323e-05	Formamide1	Additive	0.419147
rs172888	11	439973	8.44377223883739e-05	Formamide1	Additive	0.481064
rs38799	4	271812	0.000103828826350242	Formamide1	Additive
rs290069	16	695621	2.90271143137243e-10	Formamide2	Additive
rs31238	3	264216	2.97964195433127e-10	Formamide2	Additive
rs187560	12	339686	2.58083064904197e-09	Formamide2	Additive
rs94964	7	185969	2.91921944190393e-09	Formamide2	Additive	0.122632
rs208640	13	159862	7.61622103476774e-09	Formamide2	Additive	0.195414
rs253953	15	316412	1.61226681211468e-08	Formamide2	Additive
rs117619	7	1065445	2.12801759899404e-08	Formamide2	Additive	0.0414172
rs73814	5	182701	1.30130568024241e-07	Formamide2	Additive	0.22664
rs198585	12	814018	1.46343974941728e-07	Formamide2	Additive	0.0158259
rs102112	7	467733	1.82927454529e-07	Formamide2	Additive
rs292788	16	821462	1.97986550012608e-07	Formamide2	Additive	0.00497018
rs193192	12	592686	2.83965641931698e-07	Formamide2	Additive	0.206445
rs277805	16	192974	3.56655837958975e-07	Formamide2	Additive	0.13986
rs126809	8	365427	3.62043671605535e-07	Formamide2	Additive
rs224944	13	822608	7.90824946449556e-07	Formamide2	Additive	0.184264
rs174909	11	518122	1.31391336642868e-06	Formamide2	Additive	0.0180723
rs253589	15	301306	1.87455743399276e-06	Formamide2	Additive	0.382591
rs5959	2	68327	2.1918575505068e-06	Formamide2	Additive	0.0688119
rs246908	15	60240	3.07006406278475e-06	Formamide2	Additive	0.34182
rs244510	14	716711	3.09706630601782e-06	Formamide2	Additive	0.12248
rs253590	15	301308	4.2113313333151e-06	Formamide2	Additive	0.419147
rs63451	4	1276306	5.51717272590493e-06	Formamide2	Additive	0.0811078
rs18325	2	565601	1.09174103144674e-05	Formamide2	Additive	0.0688119
rs293040	16	830701	3.13228846086444e-05	Formamide2	Additive	0.112438
rs172888	11	439973	3.30568446680033e-05	Formamide2	Additive	0.481064
rs250542	15	189469	1.32847918143217e-09	Gal001	Additive	0.153361
rs25020	2	803204	3.73107485453917e-07	Gal001	Additive	0.0273605
rs25019	2	803201	3.73107485453917e-07	Gal001	Additive	0.0208556
rs263677	15	675329	4.21221357575993e-07	Gal001	Additive	0.112626
rs74582	5	212444	5.34715141441318e-07	Gal001	Additive	0.0173267
rs172119	11	402648	1.24688524981424e-06	Gal001	Additive	0.00692384
rs155011	10	519279	1.70332338662531e-06	Gal001	Additive	0.0792079
rs34717	4	101117	2.44854852154352e-06	Gal001	Additive
rs87220	6	161167	5.98852136557948e-06	Gal001	Additive	0.157765
rs236486	14	373686	9.51961496672871e-06	Gal001	Additive	0.463127
rs56382	4	955991	1.69146056322904e-05	Gal001	Additive	0.132673
rs11311	2	296198	1.80981729634731e-05	Gal2	Additive	0.0911794
rs146882	10	189048	2.85329911784135e-05	Gal2	Additive
rs98047	7	314032	3.54932493536944e-05	Gal2	Additive	0.237599
rs232378	14	206936	1.04571992472427e-05	Glu001	Additive	0.465842
rs232384	14	207040	1.04571992472427e-05	Glu001	Additive	0.479187
rs84480	6	55127	2.51921051263084e-05	Glu001	Additive	0.450397
rs84473	6	54904	2.51921051263084e-05	Glu001	Additive	0.494042
rs244510	14	716711	1.71169351461716e-06	Glu10	Additive	0.12248
rs290069	16	695621	2.94816886177693e-06	Glu10	Additive
rs246908	15	60240	4.56172271942332e-05	Glu10	Additive	0.34182
rs25019	2	803201	3.5257101123263e-12	Gly001	Additive	0.0208556
rs25020	2	803204	3.5257101123263e-12	Gly001	Additive	0.0273605
rs172119	11	402648	1.4827353665608e-11	Gly001	Additive	0.00692384
rs74582	5	212444	1.50699041342201e-11	Gly001	Additive	0.0173267
rs34717	4	101117	1.53643246085428e-11	Gly001	Additive
rs56382	4	955991	1.04533880541155e-10	Gly001	Additive	0.132673
rs263677	15	675329	1.09175961201157e-10	Gly001	Additive	0.112626
rs155011	10	519279	1.32313690303484e-10	Gly001	Additive	0.0792079
rs87220	6	161167	1.73031114153231e-10	Gly001	Additive	0.157765
rs236486	14	373686	2.27271294889425e-10	Gly001	Additive	0.463127
rs146882	10	189048	2.98958899992645e-10	Gly001	Additive
rs250542	15	189469	4.84090340187819e-10	Gly001	Additive	0.153361
rs38799	4	271812	1.37467745474968e-08	Gly001	Additive
rs53355	4	827425	3.96817002939226e-08	Gly001	Additive	0.10796
rs53357	4	827443	3.96817002939226e-08	Gly001	Additive
rs48569	4	619900	1.0315958743945e-07	Gly001	Additive	0.336816
rs142401	10	29791	5.45692152818696e-07	Gly001	Additive	0.299791
rs223150	13	758927	3.41204854946172e-06	Gly001	Additive
rs66968	4	1418477	4.11543094564068e-06	Gly001	Additive	0.369673
rs53356	4	827442	7.59670896816893e-06	Gly001	Additive	0.46425
rs80759	5	465018	1.76082513801528e-05	Gly001	Additive	0.246216
rs58104	4	1037061	1.91615457691108e-05	Gly001	Additive	0.219524
rs129207	8	461762	2.32422390203326e-05	Gly001	Additive	0.21271
rs149186	10	278383	2.50259569622051e-05	Gly001	Additive	0.0143422
rs89008	6	224599	2.61090739362847e-05	Gly001	Additive	0.0673267
rs143285	10	59301	3.78288738525541e-05	Gly001	Additive	0.381726
rs36960	4	193043	3.94129783939807e-05	Gly001	Additive	0.0967262
rs121407	8	141529	4.59335651998537e-05	Gly001	Additive	0.0281899
rs28593	3	167074	4.7244016422527e-05	Gly001	Additive	0.0410485
rs81728	5	503934	9.44909467005988e-05	Gly001	Additive	0.14096
rs291981	16	787517	0.000125872019146653	Gly001	Additive	0.0278054
rs214836	13	426219	6.88121557115403e-05	Gly2	Additive	0.280318
rs63451	4	1276306	2.33129257300093e-08	Keto10	Additive	0.0811078
rs246908	15	60240	2.36834787588743e-08	Keto10	Additive	0.34182
rs293040	16	830701	3.24315275839815e-08	Keto10	Additive	0.112438
rs292788	16	821462	6.62461762013111e-08	Keto10	Additive	0.00497018
rs172888	11	439973	1.24547193061129e-07	Keto10	Additive	0.481064
rs126809	8	365427	1.45037796095584e-07	Keto10	Additive
rs198585	12	814018	1.51170490840771e-07	Keto10	Additive	0.0158259
rs290067	16	695617	1.92844229358268e-07	Keto10	Additive	0.240704
rs18325	2	565601	3.67090689073344e-07	Keto10	Additive	0.0688119
rs193192	12	592686	6.90113173732732e-07	Keto10	Additive	0.206445
rs5959	2	68327	1.63733346230631e-06	Keto10	Additive	0.0688119
rs73814	5	182701	8.84303233498102e-06	Keto10	Additive	0.22664
rs244510	14	716711	1.43188865412795e-05	Keto10	Additive	0.12248
rs199884	12	860877	2.2716782666586e-05	Keto10	Additive	0.306931
rs231440	14	168178	2.9243475520665e-05	Keto10	Additive	0.157738
rs183843	12	193384	4.85424643991388e-05	Keto10	Additive
rs31421	3	271337	5.5110160978136e-05	Keto10	Additive	0.155941
rs53114	4	817489	5.62556491872581e-05	Keto10	Additive	0.2111
rs3762	1	159164	5.86247981378457e-05	Keto10	Additive	0.38668
rs207210	13	103222	5.98623468791083e-05	Keto10	Additive	0.384425
rs131561	9	53860	7.65437142487934e-05	Keto10	Additive	0.29782
rs224944	13	822608	8.11734975746492e-05	Keto10	Additive	0.184264
rs178799	12	24205	9.32959413495478e-05	Keto10	Additive	0.0548961
rs48142	4	607062	7.30343202241433e-09	Keto30	Additive
rs224944	13	822608	9.49590299260563e-07	Keto30	Additive	0.184264
rs293040	16	830701	2.00867852348821e-06	Keto30	Additive	0.112438
rs292788	16	821462	2.24577778706498e-06	Keto30	Additive	0.00497018
rs198585	12	814018	2.32930395464554e-06	Keto30	Additive	0.0158259
rs193192	12	592686	4.12805738756243e-06	Keto30	Additive	0.206445
rs244510	14	716711	4.35330596340652e-06	Keto30	Additive	0.12248
rs126809	8	365427	4.83152177516017e-06	Keto30	Additive
rs63451	4	1276306	5.25847433582197e-06	Keto30	Additive	0.0811078
rs31238	3	264216	6.39343545232918e-06	Keto30	Additive
rs253953	15	316412	9.79885479502686e-06	Keto30	Additive
rs5959	2	68327	1.21905731528109e-05	Keto30	Additive	0.0688119
rs102112	7	467733	1.29995217417204e-05	Keto30	Additive
rs18325	2	565601	1.60844848318719e-05	Keto30	Additive	0.0688119
rs66968	4	1418477	2.08245697468487e-05	Keto30	Additive	0.369673
rs94964	7	185969	3.52449875671021e-05	Keto30	Additive	0.122632
rs208640	13	159862	5.012215522155e-05	Keto30	Additive	0.195414
rs172888	11	439973	5.02794033792561e-05	Keto30	Additive	0.481064
rs290067	16	695617	6.17882663222277e-05	Keto30	Additive	0.240704
rs174909	11	518122	9.02518331732545e-05	Keto30	Additive	0.0180723
rs178851	12	25386	0.000121447443950198	Keto30	Additive
rs48142	4	607062	1.45745870153018e-06	Keto60	Additive
rs66968	4	1418477	4.33411270376604e-06	Keto60	Additive	0.369673
rs160423	10	705917	6.35369848856233e-06	Keto60	Additive	0.142574
rs292788	16	821462	1.25676266785207e-05	Keto60	Additive	0.00497018
rs198585	12	814018	1.43918508395726e-05	Keto60	Additive	0.0158259
rs293040	16	830701	1.47972292127791e-05	Keto60	Additive	0.112438
rs224944	13	822608	1.67648967986319e-05	Keto60	Additive	0.184264
rs193192	12	592686	2.2288792225928e-05	Keto60	Additive	0.206445
rs63451	4	1276306	3.214082076267e-05	Keto60	Additive	0.0811078
rs126809	8	365427	3.29009234239181e-05	Keto60	Additive
rs5959	2	68327	4.26657196910926e-05	Keto60	Additive	0.0688119
rs244510	14	716711	6.70059057436204e-05	Keto60	Additive	0.12248
rs18325	2	565601	8.62889750205171e-05	Keto60	Additive	0.0688119
rs172888	11	439973	0.000100270149260085	Keto60	Additive	0.481064
rs87220	6	161167	2.38548222711063e-07	MethylViologen05	Additive	0.157765
rs88127	6	191937	3.59927746822608e-07	MethylViologen05	Additive	0.221362
rs172119	11	402648	4.05914385462508e-07	MethylViologen05	Additive	0.00692384
rs25019	2	803201	4.79881717868734e-07	MethylViologen05	Additive	0.0208556
rs25020	2	803204	4.79881717868734e-07	MethylViologen05	Additive	0.0273605
rs74582	5	212444	9.84361801684901e-07	MethylViologen05	Additive	0.0173267
rs155011	10	519279	1.50575190758928e-06	MethylViologen05	Additive	0.0792079
rs236486	14	373686	1.52691746358552e-06	MethylViologen05	Additive	0.463127
rs212033	13	308827	1.99249654545378e-06	MethylViologen05	Additive	0.366337
rs56382	4	955991	2.5216643097035e-06	MethylViologen05	Additive	0.132673
rs34717	4	101117	2.70486631451444e-06	MethylViologen05	Additive
rs38799	4	271812	9.29837357022975e-06	MethylViologen05	Additive
rs88554	6	207862	1.35965454148029e-05	MethylViologen05	Additive	0.308458
rs88553	6	207856	1.35965454148029e-05	MethylViologen05	Additive
rs24272	2	782369	1.52593547400179e-05	MethylViologen05	Additive	0.412957
rs169470	11	314131	8.19367781796784e-05	MethylViologen05	Additive	0.426892
rs9048	2	187873	0.000113808711064981	MethylViologen05	Additive	0.176412
rs87220	6	161167	3.41304535403854e-11	MethylViologen1	Additive	0.157765
rs56382	4	955991	4.47454410191795e-11	MethylViologen1	Additive	0.132673
rs172119	11	402648	6.36459985733648e-11	MethylViologen1	Additive	0.00692384
rs25019	2	803201	8.15630480875798e-11	MethylViologen1	Additive	0.0208556
rs25020	2	803204	8.15630480875798e-11	MethylViologen1	Additive	0.0273605
rs34717	4	101117	1.36895832043707e-10	MethylViologen1	Additive
rs74582	5	212444	3.24886028395571e-10	MethylViologen1	Additive	0.0173267
rs236486	14	373686	1.27525728415581e-09	MethylViologen1	Additive	0.463127
rs53357	4	827443	1.96481163877412e-09	MethylViologen1	Additive
rs53355	4	827425	1.96481163877412e-09	MethylViologen1	Additive	0.10796
rs155011	10	519279	8.42744834150389e-09	MethylViologen1	Additive	0.0792079
rs38799	4	271812	2.42043827376071e-08	MethylViologen1	Additive
rs263677	15	675329	7.09000539372973e-08	MethylViologen1	Additive	0.112626
rs53356	4	827442	2.0271417729742e-06	MethylViologen1	Additive	0.46425
rs266038	15	770628	2.59662272697591e-06	MethylViologen1	Additive	0.351244
rs48569	4	619900	2.99244689605704e-06	MethylViologen1	Additive	0.336816
rs223150	13	758927	3.10813047584987e-06	MethylViologen1	Additive
rs146882	10	189048	1.51654023495863e-05	MethylViologen1	Additive
rs142401	10	29791	2.32709579716676e-05	MethylViologen1	Additive	0.299791
rs291981	16	787517	5.88601689907369e-05	MethylViologen1	Additive	0.0278054
rs277613	16	185404	6.4025412276657e-05	MethylViologen1	Additive	0.184341
rs88127	6	191937	8.27939249121949e-05	MethylViologen1	Additive	0.221362
rs25020	2	803204	1.81178100542934e-12	MethylViologen25	Additive	0.0273605
rs25019	2	803201	1.81178100542934e-12	MethylViologen25	Additive	0.0208556
rs172119	11	402648	2.73935462662394e-12	MethylViologen25	Additive	0.00692384
rs87220	6	161167	7.1622696588402e-12	MethylViologen25	Additive	0.157765
rs74582	5	212444	1.5342239528847e-11	MethylViologen25	Additive	0.0173267
rs56382	4	955991	1.62933398585051e-11	MethylViologen25	Additive	0.132673
rs34717	4	101117	1.68173356343245e-11	MethylViologen25	Additive
rs236486	14	373686	8.28785189576272e-11	MethylViologen25	Additive	0.463127
rs155011	10	519279	1.98115452293586e-10	MethylViologen25	Additive	0.0792079
rs38799	4	271812	4.3166887882426e-10	MethylViologen25	Additive
rs263677	15	675329	2.86936752378872e-07	MethylViologen25	Additive	0.112626
rs53357	4	827443	1.41792834958648e-06	MethylViologen25	Additive
rs53355	4	827425	1.41792834958648e-06	MethylViologen25	Additive	0.10796
rs146882	10	189048	4.317449917693e-06	MethylViologen25	Additive
rs223150	13	758927	1.16245395050044e-05	MethylViologen25	Additive
rs266038	15	770628	5.08481574186352e-05	MethylViologen25	Additive	0.351244
rs31238	3	264216	2.44967497638866e-06	NaCl05	Additive
rs187560	12	339686	2.03204096272635e-05	NaCl05	Additive
rs253953	15	316412	3.02912653803743e-05	NaCl05	Additive
rs233788	14	271001	7.10601632382788e-05	NaCl05	Additive	0.463366
rs178851	12	25386	0.000149987856311017	NaCl05	Additive
rs93782	7	142863	2.4858264095471e-05	NaCl1	Additive	0.282178
rs93780	7	142798	2.4858264095471e-05	NaCl1	Additive	0.281188
rs93768	7	142582	3.04907524193409e-05	NaCl1	Additive	0.241071
rs93778	7	142737	3.04907524193409e-05	NaCl1	Additive	0.249008
rs294323	16	893345	9.41264506112532e-05	NaCl1	Additive	0.175944
rs254984	15	353257	0.000102669706315302	NaCl1	Additive	0.0707221
rs251371	15	223578	0.000102669706315302	NaCl1	Additive	0.0469832
rs66968	4	1418477	5.83154047099391e-08	SMA25	Additive	0.369673
rs73814	5	182701	3.11358649614851e-07	SMA25	Additive	0.22664
rs292788	16	821462	1.08514939978851e-06	SMA25	Additive	0.00497018
rs126809	8	365427	2.54777723415198e-06	SMA25	Additive
rs244510	14	716711	2.97143693157484e-06	SMA25	Additive	0.12248
rs198585	12	814018	3.67142740894676e-06	SMA25	Additive	0.0158259
rs193192	12	592686	4.76529081887172e-06	SMA25	Additive	0.206445
rs63451	4	1276306	5.18794016893938e-06	SMA25	Additive	0.0811078
rs18325	2	565601	7.16159321070836e-06	SMA25	Additive	0.0688119
rs5959	2	68327	7.68207036460845e-06	SMA25	Additive	0.0688119
rs198600	12	814364	1.4655184916576e-05	SMA25	Additive	0.338966
rs246908	15	60240	2.78956390784842e-05	SMA25	Additive	0.34182
rs293040	16	830701	4.6688526739032e-05	SMA25	Additive	0.112438
rs172888	11	439973	5.57103660748043e-05	SMA25	Additive	0.481064
rs207845	13	127104	1.45087290050525e-06	14Deg	Overdominant	0.114243
rs225622	13	849970	2.12231377976167e-06	14Deg	Overdominant	0.280415
rs46332	4	549752	2.2003651711853e-06	14Deg	Overdominant	0.0749008
rs67884	4	1446482	2.32065615644993e-06	14Deg	Overdominant	0.319307
rs30135	3	225343	3.86692242332273e-06	14Deg	Overdominant	0.042
rs282547	16	373847	3.91970341988966e-06	14Deg	Overdominant	0.376494
rs6051	2	72386	4.56337134207585e-06	14Deg	Overdominant
rs26300	3	59518	4.63477313033371e-06	14Deg	Overdominant	0.0758176
rs252646	15	271822	4.86818102022784e-06	14Deg	Overdominant	0.397614
rs144355	10	95205	5.2986310040395e-06	14Deg	Overdominant	0.114583
rs217798	13	548622	5.53586042800244e-06	14Deg	Overdominant
rs146881	10	189045	6.12015558601063e-06	14Deg	Overdominant
rs83880	6	34967	6.23828058864354e-06	14Deg	Overdominant	0.0529703
rs247646	15	83018	8.89549431579288e-08	4NQO1	Overdominant	0.125124
rs60839	4	1161568	1.9926246120416e-07	4NQO1	Overdominant
rs46279	4	548356	5.37333689258933e-07	4NQO1	Overdominant	0.255941
rs258651	15	479604	8.27962747969039e-07	4NQO1	Overdominant	0.449304
rs166328	11	204491	9.64976475033983e-07	4NQO1	Overdominant	0.411474
rs19698	2	615005	1.70805714873116e-06	4NQO1	Overdominant	0.089604
rs287382	16	588991	2.6660045459688e-06	4NQO1	Overdominant	0.0347567
rs84458	6	54007	5.116803369323e-06	4NQO1	Overdominant	0.282394
rs60839	4	1161568	6.0357952280562e-07	4NQO2	Overdominant
rs46279	4	548356	6.19083197159285e-07	4NQO2	Overdominant	0.255941
rs261375	15	589040	4.15055953279229e-06	4NQO2	Overdominant	0.110781
rs59275	4	1083088	9.15845183150561e-06	4NQO2	Overdominant	0.327706
rs147481	10	219575	1.01788810082942e-05	4NQO2	Overdominant
rs148317	10	248754	1.01788810082942e-05	4NQO2	Overdominant	0.0747525
rs261375	15	589040	1.67582398160056e-06	4NQO3	Overdominant	0.110781
rs60839	4	1161568	3.27920566261935e-06	4NQO3	Overdominant
rs78532	5	365339	1.02663937331706e-05	4NQO3	Overdominant	0.0187933
rs56857	4	973128	1.19574859492696e-05	4NQO3	Overdominant	0.0595
rs147481	10	219575	1.19102277981301e-12	5FU100	Overdominant
rs148317	10	248754	1.19102277981301e-12	5FU100	Overdominant	0.0747525
rs212636	13	329818	2.48715543419037e-09	5FU100	Overdominant	0.0123885
rs78346	5	357163	3.35722827567659e-09	5FU100	Overdominant	0.09545
rs178318	11	642681	4.09915624913143e-09	5FU100	Overdominant	0.236894
rs258651	15	479604	1.54604638072537e-08	5FU100	Overdominant	0.449304
rs166328	11	204491	2.74462131319202e-08	5FU100	Overdominant	0.411474
rs39370	4	292985	3.10288071413118e-08	5FU100	Overdominant	0.310516
rs39798	4	311231	3.10288071413118e-08	5FU100	Overdominant	0.177083
rs293103	16	835149	4.07538511683645e-08	5FU100	Overdominant	0.382851
rs140091	9	385630	4.5682390058019e-08	5FU100	Overdominant	0.0724276
rs122493	8	178801	5.14209459851319e-08	5FU100	Overdominant	0.171457
rs160538	10	711822	8.93945301550573e-08	5FU100	Overdominant
rs146859	10	188153	1.2739103395952e-07	5FU100	Overdominant	0.161386
rs63869	4	1291676	1.42336539031065e-07	5FU100	Overdominant	0.150495
rs77820	5	336727	1.57606186263194e-07	5FU100	Overdominant	0.0816024
rs141084	9	408854	2.40073226988713e-07	5FU100	Overdominant	0.181188
rs286655	16	558141	2.67686844568259e-07	5FU100	Overdominant	0.078869
rs266369	15	780674	4.77158163756576e-07	5FU100	Overdominant
rs60839	4	1161568	8.62750383268096e-07	5FU100	Overdominant
rs157913	10	613754	1.03590581879717e-06	5FU100	Overdominant	0.0228628
rs259435	15	507156	1.30232155156331e-06	5FU100	Overdominant	0.211386
rs155555	10	540399	2.31034831765248e-06	5FU100	Overdominant
rs174626	11	506607	2.48768559792655e-06	5FU100	Overdominant	0.0802775
rs5119	2	27693	2.53346460254485e-06	5FU100	Overdominant	0.0192878
rs70996	5	74850	2.57757201407617e-06	5FU100	Overdominant	0.126113
rs70999	5	74982	2.57757201407617e-06	5FU100	Overdominant	0.138477
rs264456	15	702764	3.29178811135351e-06	5FU100	Overdominant	0.100396
rs251162	15	214734	3.64192607553422e-06	5FU100	Overdominant	0.144135
rs263470	15	670328	3.64192607553422e-06	5FU100	Overdominant	0.140159
rs30135	3	225343	4.9467004283494e-06	5FU100	Overdominant	0.042
rs38983	4	277639	5.04770137153099e-06	5FU100	Overdominant	0.156436
rs225622	13	849970	5.28560101907837e-06	5FU100	Overdominant	0.280415
rs159405	10	660546	6.40721850529203e-06	5FU100	Overdominant	0.207792
rs77254	5	313806	7.24521866343911e-06	5FU100	Overdominant	0.0426165
rs246494	15	46508	7.33267522065112e-06	5FU100	Overdominant	0.310448
rs246495	15	46512	7.33267522065112e-06	5FU100	Overdominant	0.376617
rs171936	11	394136	8.61488554779838e-06	5FU100	Overdominant	0.0971259
rs220563	13	651548	8.72818191168207e-06	5FU100	Overdominant
rs123757	8	231041	9.18684435249298e-06	5FU100	Overdominant	0.0638614
rs291787	16	774082	9.23487465991884e-06	5FU100	Overdominant	0.077877
rs190820	12	490643	1.05402903001104e-05	5FU100	Overdominant
rs229563	14	90031	1.2227947797862e-05	5FU100	Overdominant	0.187624
rs260673	15	559768	1.28030807869942e-05	5FU100	Overdominant	0.196429
rs146847	10	187652	1.50243224032054e-05	5FU100	Overdominant	0.182987
rs187030	12	316725	1.77454151190231e-05	5FU100	Overdominant	0.0707221
rs144355	10	95205	1.88885851756574e-05	5FU100	Overdominant	0.114583
rs244530	14	717421	1.99815571478428e-05	5FU100	Overdominant	0.244301
rs289684	16	679388	2.33161622395184e-05	5FU100	Overdominant
rs203961	12	1040530	2.01230360850209e-09	5FU250	Overdominant	0.0223436
rs225622	13	849970	1.99651947986581e-08	5FU250	Overdominant	0.280415
rs30135	3	225343	3.1110589340454e-07	5FU250	Overdominant	0.042
rs146847	10	187652	6.02302622239007e-07	5FU250	Overdominant	0.182987
rs260673	15	559768	6.03384655390643e-07	5FU250	Overdominant	0.196429
rs184939	12	235940	1.12659848785079e-06	5FU250	Overdominant	0.160237
rs205765	13	53825	1.18211065666275e-06	5FU250	Overdominant	0.117063
rs206909	13	94898	2.89231496848741e-06	5FU250	Overdominant	0.06182
rs159405	10	660546	3.43161546670856e-06	5FU250	Overdominant	0.207792
rs102664	7	487937	3.72267412232103e-06	5FU250	Overdominant	0.0907738
rs188111	12	364406	4.06655836421827e-06	5FU250	Overdominant	0.0690169
rs229563	14	90031	4.14678687632222e-06	5FU250	Overdominant	0.187624
rs120417	8	105589	4.77281019061001e-06	5FU250	Overdominant
rs197365	12	777784	4.96829674054844e-06	5FU250	Overdominant	0.252725
rs286240	16	538751	5.26022912667796e-06	5FU250	Overdominant	0.1199
rs159402	10	660487	5.7801570035107e-06	5FU250	Overdominant	0.197106
rs34597	4	97192	6.21481221676728e-06	5FU250	Overdominant	0.00296736
rs74095	5	192065	6.43237161074361e-06	5FU250	Overdominant	0.2475
rs197478	12	782839	6.63677212012507e-06	5FU250	Overdominant
rs26300	3	59518	7.19012648824298e-06	5FU250	Overdominant	0.0758176
rs8284	2	155732	7.69782706795169e-06	5FU250	Overdominant	0.00296736
rs90758	7	29796	8.28153805398045e-06	5FU250	Overdominant	0.0687438
rs29379	3	201156	9.09312307045378e-06	5FU250	Overdominant	0.199801
rs85395	6	86452	9.67492558857623e-06	5FU250	Overdominant	0.197824
rs135771	9	217612	1.02959406767288e-05	5FU250	Overdominant	0.118812
rs94330	7	160076	1.03764374084103e-05	5FU250	Overdominant	0.174085
rs135771	9	217612	3.65842107127205e-07	5FU50	Overdominant	0.118812
rs261295	15	586600	4.27723917941603e-07	5FU50	Overdominant
rs84698	6	64384	6.64512876234428e-07	5FU50	Overdominant	0.0994065
rs148317	10	248754	6.88086414090464e-07	5FU50	Overdominant	0.0747525
rs147481	10	219575	6.88086414090464e-07	5FU50	Overdominant
rs146859	10	188153	9.88840086524855e-07	5FU50	Overdominant	0.161386
rs171566	11	380146	1.36574231367125e-06	5FU50	Overdominant
rs88201	6	193671	1.58271237924848e-06	5FU50	Overdominant	0.193261
rs91315	7	51999	3.98342121827843e-06	5FU50	Overdominant	0.054175
rs232309	14	204725	5.30185295854906e-06	5FU50	Overdominant	0.140455
rs291684	16	769898	7.12293571066477e-06	5FU50	Overdominant	0.0842754
rs171567	11	380172	7.50219231677538e-06	5FU50	Overdominant	0.278827
rs30135	3	225343	1.04115477688186e-05	5FU50	Overdominant	0.042
rs293103	16	835149	1.42426810774654e-05	5FU50	Overdominant	0.382851
rs152315	10	391774	3.0721144472512e-09	6AU100	Overdominant	0.0663366
rs180320	12	74960	2.70573592387894e-08	6AU100	Overdominant	0.0222552
rs198047	12	801710	2.75255148008036e-08	6AU100	Overdominant	0.024728
rs198046	12	801709	2.75255148008036e-08	6AU100	Overdominant	0.024728
rs223647	13	772345	2.82278727769269e-08	6AU100	Overdominant	0.146329
rs284020	16	451153	1.37242500324414e-07	6AU100	Overdominant	0.152087
rs179285	12	36662	6.60223024076649e-07	6AU100	Overdominant
rs171567	11	380172	2.82896442983511e-06	6AU100	Overdominant	0.278827
rs46889	4	565512	4.87710436749693e-06	6AU100	Overdominant
rs130945	8	522136	7.70005357473504e-06	6AU100	Overdominant	0.380303
rs88127	6	191937	7.95319298867116e-06	6AU100	Overdominant	0.221362
rs229865	14	109033	8.31544918376457e-06	6AU100	Overdominant	0.392857
rs203088	12	1005023	9.21791853279267e-06	6AU100	Overdominant	0.255446
rs172119	11	402648	5.36139601577291e-11	6AU200	Overdominant	0.00692384
rs46889	4	565512	6.4645280592637e-11	6AU200	Overdominant
rs46882	4	565150	5.74737071367184e-09	6AU200	Overdominant	0.0887897
rs84896	6	70265	8.6849811106879e-09	6AU200	Overdominant	0.0267062
rs121024	8	127673	1.77143748909168e-08	6AU200	Overdominant	0.0341246
rs172264	11	408636	2.69524707723401e-08	6AU200	Overdominant	0.124254
rs198978	12	825136	1.0284443470599e-07	6AU200	Overdominant	0.0440594
rs25019	2	803201	1.15570043994105e-07	6AU200	Overdominant	0.0208556
rs25020	2	803204	1.15570043994105e-07	6AU200	Overdominant	0.0273605
rs146882	10	189048	1.82237430328753e-07	6AU200	Overdominant
rs219023	13	585266	1.8944202780262e-07	6AU200	Overdominant	0.101586
rs34717	4	101117	2.08137645757953e-07	6AU200	Overdominant
rs49684	4	665270	3.14459322389925e-07	6AU200	Overdominant	0.173611
rs74582	5	212444	3.86123290319103e-07	6AU200	Overdominant	0.0173267
rs83713	5	564496	1.31477348791099e-06	6AU200	Overdominant	0.170072
rs121315	8	138671	1.84616874749367e-06	6AU200	Overdominant	0.041543
rs66508	4	1401828	2.6947285421643e-06	6AU200	Overdominant	0.105655
rs139123	9	346096	2.98765052056753e-06	6AU200	Overdominant	0.264151
rs244187	14	705671	3.56073457159701e-06	6AU200	Overdominant	0.12674
rs268864	15	879406	4.69554801635721e-06	6AU200	Overdominant	0.0391477
rs191634	12	521277	5.35460218460016e-06	6AU200	Overdominant	0.428783
rs191631	12	521146	5.35460218460016e-06	6AU200	Overdominant	0.410485
rs12489	2	335052	6.79128434452992e-06	6AU200	Overdominant	0.0257426
rs291731	16	770972	7.33435259941569e-06	6AU200	Overdominant	0.185516
rs3456	1	144077	8.31319128042965e-06	6AU200	Overdominant
rs135463	9	199577	8.90425908868156e-06	6AU200	Overdominant	0.040099
rs206107	13	66752	1.1280592114824e-05	6AU200	Overdominant	0.0321464
rs162461	11	64578	1.19150906870142e-05	6AU200	Overdominant	0.0306627
rs102941	7	497747	1.21727365450511e-05	6AU200	Overdominant	0.127607
rs171567	11	380172	5.81583111335035e-06	6AU50	Overdominant	0.278827
rs104574	7	579785	1.17152235102921e-08	Benomyl100	Overdominant	0.447421
rs282547	16	373847	1.9654469752644e-08	Benomyl100	Overdominant	0.376494
rs203961	12	1040530	2.96690629832473e-08	Benomyl100	Overdominant	0.0223436
rs25802	3	40089	6.98368369879457e-07	Benomyl100	Overdominant	0.143917
rs290719	16	725291	8.50387346073532e-07	Benomyl100	Overdominant	0.0406746
rs107966	7	698544	1.18069829239495e-06	Benomyl100	Overdominant	0.00792079
rs117045	7	1041497	1.18069829239495e-06	Benomyl100	Overdominant	0.242079
rs139684	9	371957	1.44321690472058e-06	Benomyl100	Overdominant	0.200596
rs278909	16	227828	4.82596325735833e-06	Benomyl100	Overdominant	0.401093
rs140807	9	402516	4.96646672712619e-06	Benomyl100	Overdominant	0.201485
rs182196	12	132610	5.18741255377494e-06	Benomyl100	Overdominant	0.43006
rs231801	14	183942	7.56930112162039e-06	Benomyl100	Overdominant	0.235644
rs254164	15	326498	7.95097877778683e-06	Benomyl100	Overdominant	0.00148662
rs265009	15	732852	1.02375601648203e-05	Benomyl100	Overdominant	0.0237389
rs43114	4	426131	1.212399846415e-05	Benomyl100	Overdominant	0.0341584
rs85618	6	93664	1.26534470730823e-05	Benomyl100	Overdominant	0.0306627
rs203961	12	1040530	4.11966586027243e-09	Benomyl50	Overdominant	0.0223436
rs89924	7	6709	2.0705406445344e-08	Benomyl50	Overdominant	0.00727651
rs139684	9	371957	3.72448580741783e-08	Benomyl50	Overdominant	0.200596
rs198585	12	814018	4.61330522852486e-08	Benomyl50	Overdominant	0.0158259
rs238996	14	466583	1.16309858207932e-07	Benomyl50	Overdominant	0.0485629
rs250542	15	189469	1.97140481548827e-07	Benomyl50	Overdominant	0.153361
rs91337	7	53157	2.37443536446406e-07	Benomyl50	Overdominant
rs91336	7	53154	2.37443536446406e-07	Benomyl50	Overdominant
rs85618	6	93664	3.11946039647456e-07	Benomyl50	Overdominant	0.0306627
rs43114	4	426131	3.67701489323598e-07	Benomyl50	Overdominant	0.0341584
rs73814	5	182701	3.86897700322858e-07	Benomyl50	Overdominant	0.22664
rs189166	12	395528	6.44786389252621e-07	Benomyl50	Overdominant	0.0831683
rs63451	4	1276306	9.81990189736851e-07	Benomyl50	Overdominant	0.0811078
rs128262	8	420248	1.87656944949191e-06	Benomyl50	Overdominant	0.0480674
rs261384	15	589132	1.93816631497311e-06	Benomyl50	Overdominant	0.0931615
rs199112	12	830378	2.03589534332493e-06	Benomyl50	Overdominant	0.188922
rs290068	16	695619	2.44675823161992e-06	Benomyl50	Overdominant	0.314459
rs80242	5	441142	2.99015515842801e-06	Benomyl50	Overdominant	0.142574
rs293040	16	830701	3.33008928718565e-06	Benomyl50	Overdominant	0.112438
rs133628	9	132718	3.33197724904334e-06	Benomyl50	Overdominant	0.117327
rs171747	11	387154	3.41881447182664e-06	Benomyl50	Overdominant	0.0841633
rs292788	16	821462	3.73652961981554e-06	Benomyl50	Overdominant	0.00497018
rs244510	14	716711	4.02972060965819e-06	Benomyl50	Overdominant	0.12248
rs188111	12	364406	4.20968108245174e-06	Benomyl50	Overdominant	0.0690169
rs279788	16	263179	4.67427731038203e-06	Benomyl50	Overdominant	0.0548961
rs32023	3	291780	6.72361313742643e-06	Benomyl50	Overdominant	0.00410256
rs32957	4	48346	6.98488985183952e-06	Benomyl50	Overdominant	0.10297
rs180335	12	75569	7.03802813164322e-06	Benomyl50	Overdominant
rs90678	7	26299	8.67973205075292e-06	Benomyl50	Overdominant	0.272277
rs25020	2	803204	3.06251063407513e-13	Caf10	Overdominant	0.0273605
rs25019	2	803201	3.06251063407513e-13	Caf10	Overdominant	0.0208556
rs74582	5	212444	7.07736445672274e-12	Caf10	Overdominant	0.0173267
rs250542	15	189469	5.88901275261844e-10	Caf10	Overdominant	0.153361
rs146882	10	189048	6.27473935476818e-10	Caf10	Overdominant
rs172119	11	402648	2.15279293594779e-09	Caf10	Overdominant	0.00692384
rs46889	4	565512	4.16614389655201e-09	Caf10	Overdominant
rs30117	3	225128	7.246453177965e-08	Caf10	Overdominant	0.0450942
rs125347	8	304320	2.39406569362583e-07	Caf10	Overdominant	0.0509901
rs135775	9	217666	2.54873666335106e-07	Caf10	Overdominant	0.139466
rs12489	2	335052	4.74458576246936e-07	Caf10	Overdominant	0.0257426
rs173934	11	481779	1.75224169171854e-06	Caf10	Overdominant	0.0296736
rs2056	1	87911	3.1318375399347e-06	Caf10	Overdominant	0.0950495
rs89008	6	224599	3.46345494869281e-06	Caf10	Overdominant	0.0673267
rs198978	12	825136	3.66965755460675e-06	Caf10	Overdominant	0.0440594
rs34717	4	101117	6.78219136665608e-06	Caf10	Overdominant
rs127362	8	385228	8.68985277306838e-06	Caf10	Overdominant
rs213062	13	350820	9.85685664636983e-06	Caf10	Overdominant	0.190783
rs158017	10	616115	1.46505163585317e-05	Caf10	Overdominant	0.368159
rs195044	12	678800	1.48336826010124e-05	Caf10	Overdominant	0.0227498
rs146882	10	189048	1.23256962073541e-10	Caf20	Overdominant
rs250542	15	189469	1.31197045228535e-09	Caf20	Overdominant	0.153361
rs25019	2	803201	4.51357596639821e-09	Caf20	Overdominant	0.0208556
rs25020	2	803204	4.51357596639821e-09	Caf20	Overdominant	0.0273605
rs74582	5	212444	1.01062771336168e-07	Caf20	Overdominant	0.0173267
rs141572	9	418532	4.11833324306147e-07	Caf20	Overdominant	0.161386
rs46889	4	565512	6.37825969509049e-07	Caf20	Overdominant
rs172119	11	402648	6.41466979350125e-07	Caf20	Overdominant	0.00692384
rs2056	1	87911	2.04852833160941e-06	Caf20	Overdominant	0.0950495
rs125347	8	304320	2.12069370161272e-06	Caf20	Overdominant	0.0509901
rs135775	9	217666	2.42168657575431e-06	Caf20	Overdominant	0.139466
rs246059	15	29144	4.111682617718e-06	Caf20	Overdominant
rs188566	12	379915	7.62800296212287e-07	Caf40	Overdominant	0.164024
rs146882	10	189048	9.78980874762361e-07	Caf40	Overdominant
rs250542	15	189469	3.33111279717983e-06	Caf40	Overdominant	0.153361
rs46889	4	565512	3.47231579578324e-06	Caf40	Overdominant
rs291731	16	770972	4.58900109445542e-06	Caf40	Overdominant	0.185516
rs272605	15	1032017	5.43571272904688e-06	Caf40	Overdominant	0.277007
rs287677	16	597046	1.10796539066857e-10	CHX01	Overdominant	0.128968
rs130713	8	515104	1.40231576368734e-10	CHX01	Overdominant	0.20664
rs193575	12	612263	7.50501805765055e-09	CHX01	Overdominant
rs223289	13	762871	9.01387483236095e-09	CHX01	Overdominant	0.0182987
rs213362	13	367636	2.45415722651127e-08	CHX01	Overdominant	0.227905
rs184201	12	205551	4.52766820759117e-08	CHX01	Overdominant	0.0642928
rs118831	8	45571	9.21599600714088e-08	CHX01	Overdominant	0.236894
rs248048	15	96254	1.288722795325e-07	CHX01	Overdominant	0.153808
rs91655	7	64392	1.77981244399912e-07	CHX01	Overdominant
rs198081	12	803025	2.16545427021528e-07	CHX01	Overdominant	0.0831683
rs198063	12	802466	2.16545427021528e-07	CHX01	Overdominant	0.0885262
rs145823	10	146083	3.55101250989771e-07	CHX01	Overdominant	0.112871
rs224636	13	809908	3.8362206801269e-07	CHX01	Overdominant	0.0776459
rs200073	12	870969	4.40834195182326e-07	CHX01	Overdominant	0.110287
rs277484	16	180789	4.57717689080212e-07	CHX01	Overdominant	0.382557
rs135665	9	213938	1.11871442313301e-06	CHX01	Overdominant	0.114738
rs103858	7	533328	1.44822318177769e-06	CHX01	Overdominant	0.21131
rs17924	2	550916	1.49291070197891e-06	CHX01	Overdominant	0.18002
rs108092	7	702818	1.69498612354886e-06	CHX01	Overdominant
rs91441	7	55893	1.8126391591849e-06	CHX01	Overdominant
rs276265	16	129613	1.89754486746825e-06	CHX01	Overdominant
rs144154	10	88456	1.91654251587334e-06	CHX01	Overdominant
rs275721	16	106396	2.0675262969294e-06	CHX01	Overdominant	0.107426
rs25189	3	16044	2.19099320609198e-06	CHX01	Overdominant
rs53317	4	825844	2.26217412610374e-06	CHX01	Overdominant
rs165766	11	186216	2.38792119139909e-06	CHX01	Overdominant	0.343564
rs47224	4	579070	2.58946549744067e-06	CHX01	Overdominant	0.199505
rs176456	11	576352	2.72378330512203e-06	CHX01	Overdominant	0.117327
rs176455	11	576302	2.72378330512203e-06	CHX01	Overdominant
rs117780	8	12660	2.79608798008043e-06	CHX01	Overdominant	0.0258193
rs117786	8	12692	2.79608798008043e-06	CHX01	Overdominant	0.0232904
rs121728	8	150582	2.98721475772709e-06	CHX01	Overdominant	0.204861
rs144342	10	94893	3.02314528622494e-06	CHX01	Overdominant	0.128372
rs164144	11	123867	3.16962754417992e-06	CHX01	Overdominant	0.271782
rs241475	14	582958	3.81601083922869e-06	CHX01	Overdominant	0.0509397
rs69086	4	1493916	4.7603688424772e-06	CHX01	Overdominant	0.0352883
rs83713	5	564496	4.83047412591163e-06	CHX01	Overdominant	0.170072
rs8634	2	169529	5.64142221317694e-06	CHX01	Overdominant	0.211672
rs154446	10	496353	6.11965247713416e-06	CHX01	Overdominant	0.0669643
rs116094	7	1004751	6.21350015591148e-06	CHX01	Overdominant	0.0846535
rs105853	7	624442	7.0068758702629e-06	CHX01	Overdominant	0.184836
rs64934	4	1333718	8.66676792743293e-06	CHX01	Overdominant	0.0955446
rs250542	15	189469	8.68054492391155e-06	CHX01	Overdominant	0.153361
rs25200	3	16705	9.67099070829087e-06	CHX01	Overdominant	0.029703
rs46279	4	548356	7.59204255187128e-07	CHX05	Overdominant	0.255941
rs111169	7	828859	1.49905398900125e-06	CHX05	Overdominant	0.0722772
rs126005	8	334619	1.66793988769102e-06	CHX05	Overdominant
rs223893	13	781458	1.68758690152389e-06	CHX05	Overdominant	0.0697329
rs214697	13	420832	1.68758690152389e-06	CHX05	Overdominant	0.0894106
rs223905	13	782221	2.12132990689806e-06	CHX05	Overdominant	0.0913605
rs109468	7	758924	2.73125169346457e-06	CHX05	Overdominant	0.137129
rs122430	8	176997	3.02437374082576e-06	CHX05	Overdominant	0.0666004
rs46889	4	565512	3.69915768605091e-06	CHX05	Overdominant
rs12489	2	335052	3.82049402014146e-06	CHX05	Overdominant	0.0257426
rs99025	7	343639	4.44547073430786e-06	CHX05	Overdominant	0.243564
rs280395	16	289053	5.16815027829073e-13	CuSO401	Overdominant	0.266402
rs58340	4	1047131	5.33513160484302e-13	CuSO401	Overdominant	0.182673
rs58335	4	1047046	5.33513160484302e-13	CuSO401	Overdominant	0.165347
rs160356	10	701827	1.74982968437884e-12	CuSO401	Overdominant	0.0477387
rs76938	5	305019	1.82178542092097e-12	CuSO401	Overdominant	0.121769
rs231447	14	168578	2.48884173198655e-12	CuSO401	Overdominant	0.136544
rs68923	4	1484422	2.6860429799942e-12	CuSO401	Overdominant	0.0838294
rs151387	10	352608	3.78738542538743e-12	CuSO401	Overdominant	0.345545
rs151388	10	352620	3.78738542538743e-12	CuSO401	Overdominant	0.34604
rs213641	13	382792	4.74090538555444e-12	CuSO401	Overdominant	0.39604
rs180633	12	84883	5.82469404517161e-12	CuSO401	Overdominant	0.278989
rs94187	7	156057	8.82485804606882e-12	CuSO401	Overdominant	0.133634
rs274340	16	46798	9.14029209695197e-12	CuSO401	Overdominant	0.175569
rs50827	4	710109	1.09085989207992e-11	CuSO401	Overdominant	0.251241
rs124597	8	267168	1.45631912221674e-11	CuSO401	Overdominant	0.155104
rs126972	8	372172	1.5885245054579e-11	CuSO401	Overdominant	0.303271
rs216259	13	478297	2.43193932070289e-11	CuSO401	Overdominant	0.357356
rs124097	8	245577	4.1127139092149e-11	CuSO401	Overdominant
rs258591	15	476972	1.49957964538165e-10	CuSO401	Overdominant	0.148863
rs13917	2	392522	1.59867647855968e-10	CuSO401	Overdominant	0.167503
rs217018	13	514342	1.9757631217863e-10	CuSO401	Overdominant	0.105316
rs180616	12	84504	2.08987103358357e-10	CuSO401	Overdominant	0.118694
rs215481	13	448512	4.53260579979805e-10	CuSO401	Overdominant	0.195351
rs124036	8	242242	5.66843576475693e-10	CuSO401	Overdominant
rs17353	2	534637	5.7980141808705e-10	CuSO401	Overdominant	0.204861
rs106620	7	651434	2.62557560635868e-09	CuSO401	Overdominant	0.242063
rs262416	15	631958	5.31090997683659e-09	CuSO401	Overdominant	0.154419
rs7113	2	111999	5.84292283195963e-09	CuSO401	Overdominant	0.311133
rs129765	8	481335	6.27359840590333e-09	CuSO401	Overdominant	0.4
rs135722	9	215997	7.43133241498056e-09	CuSO401	Overdominant	0.141939
rs75915	5	258393	1.10470431554562e-08	CuSO401	Overdominant	0.250249
rs87528	6	171434	1.1563930347402e-08	CuSO401	Overdominant	0.0688801
rs53189	4	820442	1.60726827961804e-08	CuSO401	Overdominant	0.111771
rs144654	10	107092	2.2284529142749e-08	CuSO401	Overdominant	0.161531
rs96141	7	231071	2.60493563973763e-08	CuSO401	Overdominant	0.223046
rs116893	7	1033830	2.81139207044176e-08	CuSO401	Overdominant	0.13452
rs97520	7	291992	3.11860720879087e-08	CuSO401	Overdominant	0.206436
rs279057	16	233007	3.20012028637904e-08	CuSO401	Overdominant	0.129464
rs116739	7	1027279	3.35940389613725e-08	CuSO401	Overdominant	0.117211
rs279072	16	233841	3.71511062631133e-08	CuSO401	Overdominant	0.225694
rs4757	2	10621	4.22972705208493e-08	CuSO401	Overdominant	0.140455
rs154001	10	463222	6.3520011715992e-08	CuSO401	Overdominant	0.0656716
rs98786	7	335555	1.00439202286615e-07	CuSO401	Overdominant	0.226508
rs68928	4	1484729	1.06357153109327e-07	CuSO401	Overdominant	0.195933
rs49808	4	671820	1.19858056907188e-07	CuSO401	Overdominant	0.379464
rs6594	2	95270	1.26555812347476e-07	CuSO401	Overdominant	0.476261
rs51845	4	752433	1.71653718879012e-07	CuSO401	Overdominant	0.245788
rs72050	5	107580	1.84560200580731e-07	CuSO401	Overdominant	0.128345
rs285478	16	505721	2.55634551393612e-07	CuSO401	Overdominant	0.210813
rs9270	2	196868	2.63541106321012e-07	CuSO401	Overdominant
rs135665	9	213938	2.81154614298666e-07	CuSO401	Overdominant	0.114738
rs77427	5	320500	4.49684193221391e-07	CuSO401	Overdominant	0.166172
rs158681	10	635710	4.68517940607807e-07	CuSO401	Overdominant	0.0806931
rs151693	10	364397	5.13287689164102e-07	CuSO401	Overdominant	0.231913
rs192654	12	567173	6.33564090409701e-07	CuSO401	Overdominant	0.242304
rs289621	16	677078	6.59731262349203e-07	CuSO401	Overdominant	0.113208
rs96261	7	236277	7.3094980961016e-07	CuSO401	Overdominant	0.324926
rs120814	8	119726	7.68933538769456e-07	CuSO401	Overdominant	0.12767
rs103541	7	522374	7.6938736066048e-07	CuSO401	Overdominant	0.168818
rs215468	13	448139	8.04229667843156e-07	CuSO401	Overdominant	0.164356
rs215461	13	447865	8.04229667843156e-07	CuSO401	Overdominant	0.179031
rs41571	4	374633	9.2573135590215e-07	CuSO401	Overdominant	0.049456
rs39831	4	312488	9.35897147523187e-07	CuSO401	Overdominant	0.217606
rs103858	7	533328	9.92340572869621e-07	CuSO401	Overdominant	0.21131
rs69918	5	37747	1.00442757928245e-06	CuSO401	Overdominant	0.0897308
rs97519	7	291925	1.06928314486417e-06	CuSO401	Overdominant	0.10119
rs81131	5	476809	1.10955915858482e-06	CuSO401	Overdominant	0.217197
rs264456	15	702764	1.1200271216878e-06	CuSO401	Overdominant	0.100396
rs264630	15	715815	1.27724466060575e-06	CuSO401	Overdominant	0.431683
rs264635	15	716400	1.27724466060575e-06	CuSO401	Overdominant	0.344433
rs211513	13	286123	1.46545749919099e-06	CuSO401	Overdominant	0.139742
rs69215	4	1501442	1.51112783205688e-06	CuSO401	Overdominant	0.170466
rs229435	14	85056	1.73117810773199e-06	CuSO401	Overdominant	0.324752
rs238659	14	449939	1.75747813859541e-06	CuSO401	Overdominant	0.225871
rs22567	2	721088	1.8226383853626e-06	CuSO401	Overdominant	0.202085
rs207022	13	98310	1.92409703333623e-06	CuSO401	Overdominant	0.188614
rs268583	15	868576	2.25981869971206e-06	CuSO401	Overdominant	0.264677
rs221696	13	698569	2.41136958825932e-06	CuSO401	Overdominant	0.450549
rs172119	11	402648	2.45404416960621e-06	CuSO401	Overdominant	0.00692384
rs213012	13	347381	3.14071866073168e-06	CuSO401	Overdominant	0.1525
rs224627	13	809473	3.147898564611e-06	CuSO401	Overdominant	0.494048
rs102941	7	497747	3.35468686957714e-06	CuSO401	Overdominant	0.127607
rs135463	9	199577	3.69379896923662e-06	CuSO401	Overdominant	0.040099
rs129254	8	463767	4.0483524420131e-06	CuSO401	Overdominant	0.337325
rs7946	2	143354	4.06861405700354e-06	CuSO401	Overdominant	0.112376
rs200735	12	897689	4.25350517389878e-06	CuSO401	Overdominant	0.244554
rs4613	1	197996	4.2834909213585e-06	CuSO401	Overdominant	0.131868
rs102436	7	480161	4.32465657955159e-06	CuSO401	Overdominant	0.171627
rs289819	16	684460	4.33956289091173e-06	CuSO401	Overdominant	0.207631
rs221232	13	680399	4.60501229012852e-06	CuSO401	Overdominant	0.159564
rs215015	13	433403	4.74530470271445e-06	CuSO401	Overdominant	0.217131
rs174878	11	516074	4.7867221585345e-06	CuSO401	Overdominant	0.271772
rs116957	7	1037556	5.22798634195339e-06	CuSO401	Overdominant	0.475124
rs241256	14	568278	5.5735030387875e-06	CuSO401	Overdominant	0.232741
rs39125	4	283830	5.61609653005037e-06	CuSO401	Overdominant	0.342105
rs143435	10	63875	5.77489820972623e-06	CuSO401	Overdominant	0.0657765
rs85517	6	91190	6.85822836986602e-06	CuSO401	Overdominant	0.166832
rs107243	7	670374	6.89694174667909e-06	CuSO401	Overdominant	0.47181
rs252974	15	282838	7.26849326160572e-06	CuSO401	Overdominant	0.0752475
rs90391	7	19183	7.49160864654848e-06	CuSO401	Overdominant	0.340061
rs90392	7	19186	7.49160864654848e-06	CuSO401	Overdominant	0.339575
rs88468	6	204006	7.62114537430375e-06	CuSO401	Overdominant	0.10995
rs7994	2	144820	7.84169573859876e-06	CuSO401	Overdominant
rs189954	12	418844	8.26867205842158e-06	CuSO401	Overdominant	0.320258
rs189956	12	418928	8.26867205842158e-06	CuSO401	Overdominant	0.306548
rs284931	16	485132	9.26609985080367e-06	CuSO401	Overdominant	0.294351
rs203618	12	1027067	1.01976571290876e-05	CuSO401	Overdominant	0.132047
rs58340	4	1047131	3.09261667515163e-12	CuSO405	Overdominant	0.182673
rs58335	4	1047046	3.09261667515163e-12	CuSO405	Overdominant	0.165347
rs280395	16	289053	7.30998736121209e-12	CuSO405	Overdominant	0.266402
rs160356	10	701827	1.20347941528616e-11	CuSO405	Overdominant	0.0477387
rs231447	14	168578	1.3414951323241e-11	CuSO405	Overdominant	0.136544
rs50827	4	710109	1.55715526153846e-10	CuSO405	Overdominant	0.251241
rs213641	13	382792	6.67416431962396e-10	CuSO405	Overdominant	0.39604
rs274340	16	46798	1.28439666795819e-09	CuSO405	Overdominant	0.175569
rs125467	8	312174	2.3158639081339e-09	CuSO405	Overdominant	0.229435
rs278356	16	210832	2.41174187284321e-09	CuSO405	Overdominant	0.0897308
rs158681	10	635710	4.17788178156513e-09	CuSO405	Overdominant	0.0806931
rs221232	13	680399	1.1435803699529e-08	CuSO405	Overdominant	0.159564
rs76593	5	283533	1.37494441534533e-08	CuSO405	Overdominant	0.0660661
rs118265	8	27988	1.81482260780971e-08	CuSO405	Overdominant	0.0659068
rs118268	8	28073	1.81482260780971e-08	CuSO405	Overdominant	0.0852329
rs96261	7	236277	3.82958226886262e-08	CuSO405	Overdominant	0.324926
rs200654	12	893693	4.22010682738627e-08	CuSO405	Overdominant	0.116222
rs140015	9	384189	4.94857229347932e-08	CuSO405	Overdominant	0.139604
rs211513	13	286123	6.76900319481111e-08	CuSO405	Overdominant	0.139742
rs214329	13	406240	9.53223905590695e-08	CuSO405	Overdominant
rs214335	13	406355	9.53223905590695e-08	CuSO405	Overdominant	0.154113
rs4374	1	194101	1.01514261263591e-07	CuSO405	Overdominant	0.105788
rs156745	10	582927	1.04625907073314e-07	CuSO405	Overdominant	0.182493
rs205081	13	30565	1.21812157967684e-07	CuSO405	Overdominant	0.144554
rs27887	3	134374	1.25011879232982e-07	CuSO405	Overdominant	0.204658
rs112067	7	862412	1.9713431624018e-07	CuSO405	Overdominant	0.190594
rs7113	2	111999	2.07689513895958e-07	CuSO405	Overdominant	0.311133
rs203151	12	1007751	2.21310259281641e-07	CuSO405	Overdominant	0.0838294
rs51845	4	752433	2.35260265286647e-07	CuSO405	Overdominant	0.245788
rs172143	11	403482	2.55341870112892e-07	CuSO405	Overdominant	0.309217
rs216259	13	478297	3.61050801240427e-07	CuSO405	Overdominant	0.357356
rs124097	8	245577	3.79120107807864e-07	CuSO405	Overdominant
rs4613	1	197996	4.8120049087209e-07	CuSO405	Overdominant	0.131868
rs244510	14	716711	4.95560387302999e-07	CuSO405	Overdominant	0.12248
rs62745	4	1250650	5.20219360247802e-07	CuSO405	Overdominant	0.294554
rs151997	10	378194	5.47757305718661e-07	CuSO405	Overdominant	0.266332
rs178721	12	22509	6.58835385672163e-07	CuSO405	Overdominant	0.0319043
rs275151	16	82848	6.76285064294463e-07	CuSO405	Overdominant	0.0336301
rs85541	6	92208	6.81696461287756e-07	CuSO405	Overdominant	0.356789
rs232083	14	195766	7.39773076763152e-07	CuSO405	Overdominant
rs292788	16	821462	9.68324082175894e-07	CuSO405	Overdominant	0.00497018
rs98786	7	335555	1.08649716756809e-06	CuSO405	Overdominant	0.226508
rs106620	7	651434	1.1487522260939e-06	CuSO405	Overdominant	0.242063
rs112720	7	887801	1.23129709684588e-06	CuSO405	Overdominant	0.141584
rs112721	7	887855	1.23129709684588e-06	CuSO405	Overdominant
rs251727	15	235404	1.25234554372587e-06	CuSO405	Overdominant	0.0337637
rs223453	13	768019	1.2747208624463e-06	CuSO405	Overdominant	0.300793
rs129765	8	481335	1.38923845548523e-06	CuSO405	Overdominant	0.4
rs238241	14	435739	1.40844026648929e-06	CuSO405	Overdominant	0.162698
rs71838	5	101643	1.7517877927405e-06	CuSO405	Overdominant	0.238614
rs233250	14	245307	1.91089515357887e-06	CuSO405	Overdominant	0.252234
rs8192	2	152624	2.31612949058426e-06	CuSO405	Overdominant	0.14492
rs124036	8	242242	2.92361459047822e-06	CuSO405	Overdominant
rs263369	15	667693	3.6665061367109e-06	CuSO405	Overdominant	0.1375
rs263249	15	664146	3.6665061367109e-06	CuSO405	Overdominant
rs69918	5	37747	3.70910208311499e-06	CuSO405	Overdominant	0.0897308
rs178680	12	21869	3.93621425225921e-06	CuSO405	Overdominant	0.056331
rs7185	2	114766	4.27782408299589e-06	CuSO405	Overdominant	0.10396
rs126972	8	372172	5.07292214659644e-06	CuSO405	Overdominant	0.303271
rs303	1	33939	5.73104178735973e-06	CuSO405	Overdominant	0.0705065
rs128262	8	420248	5.83193584494163e-06	CuSO405	Overdominant	0.0480674
rs293040	16	830701	6.05393669635904e-06	CuSO405	Overdominant	0.112438
rs220689	13	656131	6.37595949732963e-06	CuSO405	Overdominant	0.245283
rs88468	6	204006	6.43748691075489e-06	CuSO405	Overdominant	0.10995
rs4468	1	196249	6.55894971108275e-06	CuSO405	Overdominant	0.116766
rs4485	1	196492	6.55894971108275e-06	CuSO405	Overdominant	0.112224
rs140757	9	401181	6.86088210655106e-06	CuSO405	Overdominant	0.218533
rs174019	11	484474	7.16302677558356e-06	CuSO405	Overdominant	0.199801
rs180616	12	84504	7.29334634344462e-06	CuSO405	Overdominant	0.118694
rs25110	3	14139	7.73090431138337e-06	CuSO405	Overdominant	0.117904
rs67336	4	1429971	9.24382129225739e-06	CuSO405	Overdominant	0.320297
rs51049	4	717840	9.47586653338732e-06	CuSO405	Overdominant	0.159722
rs169629	11	319143	1.03232637759238e-05	CuSO405	Overdominant	0.369177
rs169753	11	323565	1.03232637759238e-05	CuSO405	Overdominant	0.455446
rs181432	12	111246	1.06138833502167e-05	CuSO405	Overdominant	0.114851
rs116739	7	1027279	1.21682753469347e-05	CuSO405	Overdominant	0.117211
rs172033	11	398843	1.34445622411968e-05	CuSO405	Overdominant	0.0642928
rs174870	11	515627	1.36420636000483e-05	CuSO405	Overdominant	0.0956392
rs171747	11	387154	1.41807677317634e-05	CuSO405	Overdominant	0.0841633
rs229470	14	86042	1.5010560680112e-07	Fluco1	Overdominant	0.143564
rs211788	13	298712	3.61237689927816e-07	Fluco1	Overdominant	0.158911
rs94764	7	177152	1.02128765964434e-06	Fluco1	Overdominant	0.402572
rs136555	9	250581	1.03322879899083e-06	Fluco1	Overdominant	0.40377
rs279653	16	256995	1.62917961623963e-06	Fluco1	Overdominant	0.22371
rs34376	4	89384	1.7162631520322e-06	Fluco1	Overdominant	0.362871
rs33562	4	67549	1.95281960252313e-06	Fluco1	Overdominant	0.204163
rs24305	2	784284	2.1776566900217e-06	Fluco1	Overdominant
rs238005	14	427278	3.32547216568195e-06	Fluco1	Overdominant
rs138082	9	303690	3.93661532993613e-06	Fluco1	Overdominant	0.26561
rs71767	5	99455	4.54164303566269e-06	Fluco1	Overdominant	0.15495
rs72786	5	139492	6.62762285759854e-06	Fluco1	Overdominant	0.16551
rs198063	12	802466	1.42326132862743e-12	Fluco10	Overdominant	0.0885262
rs198081	12	803025	1.42326132862743e-12	Fluco10	Overdominant	0.0831683
rs280173	16	280596	2.20099472982776e-11	Fluco10	Overdominant	0.103072
rs17924	2	550916	5.10085940039353e-09	Fluco10	Overdominant	0.18002
rs121728	8	150582	2.13821338949437e-08	Fluco10	Overdominant	0.204861
rs241475	14	582958	2.9668925078011e-08	Fluco10	Overdominant	0.0509397
rs260006	15	528159	3.24607145240343e-08	Fluco10	Overdominant	0.089604
rs287677	16	597046	5.22032619398737e-08	Fluco10	Overdominant	0.128968
rs130713	8	515104	5.82500594858316e-08	Fluco10	Overdominant	0.20664
rs213362	13	367636	6.40403393844089e-08	Fluco10	Overdominant	0.227905
rs270937	15	961266	7.30087750155731e-08	Fluco10	Overdominant	0.0553907
rs257578	15	440271	1.07871991885223e-07	Fluco10	Overdominant	0.123885
rs101770	7	452691	1.9197907492383e-07	Fluco10	Overdominant	0.0392254
rs44210	4	466362	1.93576127436351e-07	Fluco10	Overdominant	0.0465808
rs131118	9	34681	2.06407693044542e-07	Fluco10	Overdominant	0.00254065
rs232791	14	225989	2.6103069867443e-07	Fluco10	Overdominant	0.0683168
rs116094	7	1004751	2.79655912097866e-07	Fluco10	Overdominant	0.0846535
rs248048	15	96254	4.91895616899643e-07	Fluco10	Overdominant	0.153808
rs118831	8	45571	4.9453705722771e-07	Fluco10	Overdominant	0.236894
rs159529	10	664155	6.25218306621778e-07	Fluco10	Overdominant
rs104941	7	592987	6.3679207176779e-07	Fluco10	Overdominant	0.222552
rs83713	5	564496	1.09508982570903e-06	Fluco10	Overdominant	0.170072
rs31238	3	264216	1.7402715764517e-06	Fluco10	Overdominant
rs197703	12	791024	1.78954065447774e-06	Fluco10	Overdominant	0.183217
rs280603	16	296884	1.89713203138144e-06	Fluco10	Overdominant	0.169307
rs58573	4	1055064	1.98311785289927e-06	Fluco10	Overdominant	0.213366
rs279110	16	235008	2.66052676721836e-06	Fluco10	Overdominant	0.154797
rs279122	16	235233	2.66052676721836e-06	Fluco10	Overdominant	0.152819
rs172122	11	402723	2.69624443724163e-06	Fluco10	Overdominant
rs197461	12	782002	2.9446422710319e-06	Fluco10	Overdominant	0.2889
rs241693	14	591601	3.67779440949185e-06	Fluco10	Overdominant	0.238119
rs185738	12	264080	6.16991140322486e-06	Fluco10	Overdominant
rs174383	11	498054	6.17938738542424e-06	Fluco10	Overdominant	0.0237624
rs32278	3	297706	8.52856959194622e-06	Fluco10	Overdominant	0.0671176
rs121493	8	144266	9.05456985267224e-06	Fluco10	Overdominant	0.20199
rs219289	13	597167	1.01980405766219e-05	Fluco10	Overdominant	0.217047
rs197785	12	792945	1.02575158143752e-05	Fluco10	Overdominant	0.22453
rs58573	4	1055064	6.12152259383291e-11	Fluco5	Overdominant	0.213366
rs198081	12	803025	9.30782643424686e-11	Fluco5	Overdominant	0.0831683
rs198063	12	802466	9.30782643424686e-11	Fluco5	Overdominant	0.0885262
rs121728	8	150582	2.62794436469873e-10	Fluco5	Overdominant	0.204861
rs241475	14	582958	3.77978498974617e-10	Fluco5	Overdominant	0.0509397
rs280173	16	280596	1.34900102868319e-09	Fluco5	Overdominant	0.103072
rs17924	2	550916	1.88500686643069e-09	Fluco5	Overdominant	0.18002
rs122050	8	160969	6.78075948508684e-09	Fluco5	Overdominant	0.0945545
rs260006	15	528159	9.54662343840514e-08	Fluco5	Overdominant	0.089604
rs121493	8	144266	9.9062276857115e-08	Fluco5	Overdominant	0.20199
rs125888	8	330276	1.38917526307347e-07	Fluco5	Overdominant	0.130823
rs44210	4	466362	1.48451020068486e-07	Fluco5	Overdominant	0.0465808
rs131118	9	34681	2.26600235069416e-07	Fluco5	Overdominant	0.00254065
rs213362	13	367636	2.75063486080937e-07	Fluco5	Overdominant	0.227905
rs185738	12	264080	3.79403233730246e-07	Fluco5	Overdominant
rs263677	15	675329	6.89562919714386e-07	Fluco5	Overdominant	0.112626
rs104941	7	592987	1.1341029342494e-06	Fluco5	Overdominant	0.222552
rs219289	13	597167	1.23248656337084e-06	Fluco5	Overdominant	0.217047
rs272564	15	1030315	1.73436931460347e-06	Fluco5	Overdominant	0.144554
rs257578	15	440271	1.83676049201545e-06	Fluco5	Overdominant	0.123885
rs84134	6	42010	2.05676178661184e-06	Fluco5	Overdominant	0.111276
rs92208	7	82731	2.43458911960893e-06	Fluco5	Overdominant	0.0929773
rs120488	8	107541	2.45269671787927e-06	Fluco5	Overdominant	0.252731
rs118831	8	45571	2.51010818143389e-06	Fluco5	Overdominant	0.236894
rs248048	15	96254	2.57242500107232e-06	Fluco5	Overdominant	0.153808
rs159529	10	664155	2.57791429554509e-06	Fluco5	Overdominant
rs31238	3	264216	2.73325106854094e-06	Fluco5	Overdominant
rs11733	2	308816	2.82025211818306e-06	Fluco5	Overdominant	0.0877106
rs286307	16	541496	3.01667690570946e-06	Fluco5	Overdominant	0.23
rs49808	4	671820	3.07195431048311e-06	Fluco5	Overdominant	0.379464
rs242433	14	633233	3.54308738190043e-06	Fluco5	Overdominant	0.0445104
rs6594	2	95270	3.55604436565277e-06	Fluco5	Overdominant	0.476261
rs176592	11	580625	3.59996514814306e-06	Fluco5	Overdominant
rs285909	16	521626	5.2266415499246e-06	Fluco5	Overdominant
rs112335	7	874582	5.5306647240382e-06	Fluco5	Overdominant	0.182178
rs172122	11	402723	5.63636894342806e-06	Fluco5	Overdominant
rs186398	12	291601	1.0513946626969e-05	Fluco5	Overdominant	0.0224261
rs4324	1	192945	1.08035140642237e-05	Fluco5	Overdominant	0.1835
rs39092	4	282713	1.61120850960038e-10	Formamide1	Overdominant	0.187314
rs198585	12	814018	2.30729685168454e-10	Formamide1	Overdominant	0.0158259
rs232421	14	208554	3.18909937103213e-10	Formamide1	Overdominant	0.152475
rs244510	14	716711	1.53247303230486e-09	Formamide1	Overdominant	0.12248
rs213337	13	366795	2.38805547018162e-09	Formamide1	Overdominant	0.227723
rs294327	16	893447	3.47337936870023e-09	Formamide1	Overdominant	0.333333
rs105465	7	611358	6.5081887313388e-09	Formamide1	Overdominant	0.242829
rs65740	4	1364750	9.95358070878816e-09	Formamide1	Overdominant	0.146184
rs294332	16	893672	5.7607864162907e-08	Formamide1	Overdominant	0.305556
rs25679	3	35251	6.03910399986098e-08	Formamide1	Overdominant	0.078635
rs73814	5	182701	1.0215222177084e-07	Formamide1	Overdominant	0.22664
rs263513	15	671651	1.3355495805041e-07	Formamide1	Overdominant	0.135189
rs192444	12	556350	2.00893280143361e-07	Formamide1	Overdominant
rs258830	15	486192	2.5857864438495e-07	Formamide1	Overdominant	0.157426
rs250542	15	189469	2.88568901235109e-07	Formamide1	Overdominant	0.153361
rs102211	7	472246	3.71510019491599e-07	Formamide1	Overdominant	0.179386
rs292788	16	821462	3.76184632532521e-07	Formamide1	Overdominant	0.00497018
rs26531	3	68046	3.83118067899439e-07	Formamide1	Overdominant	0.342418
rs199884	12	860877	7.93021775837164e-07	Formamide1	Overdominant	0.306931
rs52051	4	766080	9.43702057366121e-07	Formamide1	Overdominant	0.107814
rs295278	16	924943	1.93365220234783e-06	Formamide1	Overdominant	0.0406746
rs72688	5	134351	1.97937594648148e-06	Formamide1	Overdominant	0.111881
rs140289	9	389038	2.05807748632305e-06	Formamide1	Overdominant	0.065239
rs241358	14	577297	2.13163596451044e-06	Formamide1	Overdominant	0.230159
rs90904	7	34339	2.19666734531689e-06	Formamide1	Overdominant	0.0583581
rs221797	13	702572	2.4996396792486e-06	Formamide1	Overdominant	0.0637982
rs266746	15	797335	2.50588379439881e-06	Formamide1	Overdominant	0.228981
rs243580	14	682580	2.62610208025723e-06	Formamide1	Overdominant	0.13668
rs292298	16	799614	2.78846224941665e-06	Formamide1	Overdominant
rs281401	16	335267	2.83990858476413e-06	Formamide1	Overdominant	0.381448
rs265142	15	738533	4.78858193877891e-06	Formamide1	Overdominant
rs207606	13	119016	5.42714354485804e-06	Formamide1	Overdominant	0.143707
rs117079	7	1042609	5.87140324280081e-06	Formamide1	Overdominant	0.110396
rs206909	13	94898	6.08881270131698e-06	Formamide1	Overdominant	0.06182
rs102664	7	487937	6.186893010048e-06	Formamide1	Overdominant	0.0907738
rs173934	11	481779	7.22236675808832e-06	Formamide1	Overdominant	0.0296736
rs80480	5	456087	7.69197893445909e-06	Formamide1	Overdominant	0.385799
rs99557	7	363152	7.84247588690881e-06	Formamide1	Overdominant	0.193261
rs24876	2	799021	8.54119468641818e-06	Formamide1	Overdominant	0.253521
rs286711	16	561434	9.09580051836844e-06	Formamide1	Overdominant	0.0767697
rs278854	16	226571	9.1990024045082e-06	Formamide1	Overdominant	0.0297915
rs278800	16	225206	9.1990024045082e-06	Formamide1	Overdominant	0.0332012
rs290067	16	695617	9.26912573041851e-06	Formamide1	Overdominant	0.240704
rs277561	16	183385	9.85991216105344e-06	Formamide1	Overdominant	0.114243
rs277567	16	183482	9.85991216105344e-06	Formamide1	Overdominant
rs158719	10	637464	9.96983776921162e-06	Formamide1	Overdominant	0.198515
rs152573	10	401667	9.96983776921162e-06	Formamide1	Overdominant	0.0395648
rs28423	3	161253	1.09343957572342e-05	Formamide1	Overdominant	0.13776
rs198894	12	822045	1.09715765535659e-05	Formamide1	Overdominant	0.0173096
rs49947	4	677316	1.21586887800643e-05	Formamide1	Overdominant	0.0682493
rs172033	11	398843	9.12744702606592e-10	Formamide2	Overdominant	0.0642928
rs158681	10	635710	1.28395254879532e-09	Formamide2	Overdominant	0.0806931
rs244510	14	716711	4.16802950985453e-09	Formamide2	Overdominant	0.12248
rs198585	12	814018	9.2448477953318e-09	Formamide2	Overdominant	0.0158259
rs102664	7	487937	2.10578855531255e-08	Formamide2	Overdominant	0.0907738
rs206909	13	94898	2.23913514830492e-08	Formamide2	Overdominant	0.06182
rs259397	15	505415	3.4917451370573e-08	Formamide2	Overdominant	0.203759
rs103858	7	533328	5.8486975826951e-08	Formamide2	Overdominant	0.21131
rs258830	15	486192	1.42890875769255e-07	Formamide2	Overdominant	0.157426
rs232421	14	208554	1.9635803269785e-07	Formamide2	Overdominant	0.152475
rs295278	16	924943	1.97000195375627e-07	Formamide2	Overdominant	0.0406746
rs102941	7	497747	2.20861365499162e-07	Formamide2	Overdominant	0.127607
rs135463	9	199577	4.07640212912764e-07	Formamide2	Overdominant	0.040099
rs39092	4	282713	4.67841751067018e-07	Formamide2	Overdominant	0.187314
rs290069	16	695621	6.62348196680322e-07	Formamide2	Overdominant
rs102211	7	472246	8.01673006876415e-07	Formamide2	Overdominant	0.179386
rs100133	7	384196	8.94897167492585e-07	Formamide2	Overdominant
rs140289	9	389038	1.20900306764039e-06	Formamide2	Overdominant	0.065239
rs207606	13	119016	1.33343968986095e-06	Formamide2	Overdominant	0.143707
rs72688	5	134351	1.42657714790296e-06	Formamide2	Overdominant	0.111881
rs25679	3	35251	1.5792098516735e-06	Formamide2	Overdominant	0.078635
rs133501	9	128641	1.78211842055206e-06	Formamide2	Overdominant	0.10099
rs173934	11	481779	1.81382349371735e-06	Formamide2	Overdominant	0.0296736
rs130408	8	502641	1.85645128847706e-06	Formamide2	Overdominant	0.198413
rs130403	8	502447	1.85645128847706e-06	Formamide2	Overdominant
rs215278	13	440477	2.08964458567689e-06	Formamide2	Overdominant	0.0771513
rs8192	2	152624	2.44068946217009e-06	Formamide2	Overdominant	0.14492
rs221797	13	702572	2.95483122837698e-06	Formamide2	Overdominant	0.0637982
rs292298	16	799614	3.16199174614485e-06	Formamide2	Overdominant
rs38390	4	255340	3.85754367577085e-06	Formamide2	Overdominant	0.141724
rs222671	13	738224	4.38943433011672e-06	Formamide2	Overdominant	0.313181
rs101933	7	459980	4.41577304410856e-06	Formamide2	Overdominant	0.0894632
rs28691	3	170648	4.65569359595847e-06	Formamide2	Overdominant
rs222713	13	740466	5.15889260306889e-06	Formamide2	Overdominant	0.244544
rs155059	10	521770	5.20062396384118e-06	Formamide2	Overdominant	0.0747525
rs85978	6	105370	5.44869284660156e-06	Formamide2	Overdominant	0.0834161
rs239212	14	475445	5.5227344567571e-06	Formamide2	Overdominant	0.0722057
rs25200	3	16705	5.56752509926507e-06	Formamide2	Overdominant	0.029703
rs124036	8	242242	7.0039592900515e-06	Formamide2	Overdominant
rs41571	4	374633	7.86223890184082e-06	Formamide2	Overdominant	0.049456
rs171097	11	366064	8.25968534985865e-06	Formamide2	Overdominant	0.215988
rs171095	11	366045	8.25968534985865e-06	Formamide2	Overdominant	0.218967
rs254277	15	331264	9.89015543416055e-06	Formamide2	Overdominant	0.0558853
rs292788	16	821462	1.08013925505519e-05	Formamide2	Overdominant	0.00497018
rs240322	14	515988	6.79304268374364e-07	Formamide5	Overdominant
rs262373	15	629965	1.8668139683358e-06	Formamide5	Overdominant	0.0625621
rs100324	7	391279	5.39781432180567e-06	Formamide5	Overdominant	0.105836
rs137755	9	292259	6.22636065054559e-06	Formamide5	Overdominant
rs159100	10	649721	6.69509800417285e-06	Formamide5	Overdominant	0.0276954
rs30135	3	225343	9.5472368081065e-06	Formamide5	Overdominant	0.042
rs93823	7	144248	1.68277506201964e-05	Formamide5	Overdominant	0.282673
rs232421	14	208554	1.43826918585715e-09	Gal001	Overdominant	0.152475
rs263677	15	675329	4.98452383599322e-09	Gal001	Overdominant	0.112626
rs39092	4	282713	1.00349303792585e-08	Gal001	Overdominant	0.187314
rs140155	9	386312	1.26911036629796e-08	Gal001	Overdominant	0.114141
rs250542	15	189469	2.57156783758402e-08	Gal001	Overdominant	0.153361
rs203961	12	1040530	6.76512493136198e-08	Gal001	Overdominant	0.0223436
rs135009	9	182402	6.99771556316959e-08	Gal001	Overdominant	0.193261
rs273846	16	30529	1.43452960236751e-07	Gal001	Overdominant	0.122894
rs144342	10	94893	1.81551423716494e-07	Gal001	Overdominant	0.128372
rs182362	12	139755	1.95773697390059e-07	Gal001	Overdominant	0.126858
rs197478	12	782839	3.20597818524631e-07	Gal001	Overdominant
rs140289	9	389038	3.3086748813156e-07	Gal001	Overdominant	0.065239
rs144154	10	88456	3.59310189072968e-07	Gal001	Overdominant
rs25189	3	16044	4.3274019130361e-07	Gal001	Overdominant
rs72688	5	134351	5.33409442183534e-07	Gal001	Overdominant	0.111881
rs238241	14	435739	8.62574451918453e-07	Gal001	Overdominant	0.162698
rs152132	10	384932	9.47678817406027e-07	Gal001	Overdominant	0.0950495
rs211123	13	266926	1.11281794366991e-06	Gal001	Overdominant	0.0833333
rs243580	14	682580	1.32777392175639e-06	Gal001	Overdominant	0.13668
rs158017	10	616115	1.47761119825956e-06	Gal001	Overdominant	0.368159
rs105465	7	611358	1.59668738206237e-06	Gal001	Overdominant	0.242829
rs146288	10	163052	1.61898720642667e-06	Gal001	Overdominant	0.221011
rs65740	4	1364750	1.71055489832056e-06	Gal001	Overdominant	0.146184
rs168084	11	273017	1.77370841825531e-06	Gal001	Overdominant	0.0910891
rs263513	15	671651	2.15374407640398e-06	Gal001	Overdominant	0.135189
rs238559	14	446677	3.06395309124177e-06	Gal001	Overdominant	0.127228
rs140464	9	394992	3.13370274140057e-06	Gal001	Overdominant	0.262262
rs238052	14	428693	3.37454981768687e-06	Gal001	Overdominant	0.100595
rs194341	12	645374	3.40595662568132e-06	Gal001	Overdominant	0.0163205
rs283111	16	403706	3.88607790692601e-06	Gal001	Overdominant	0.19703
rs23378	2	751226	3.9314216719838e-06	Gal001	Overdominant
rs55394	4	918606	4.31169700968815e-06	Gal001	Overdominant
rs53399	4	829373	4.78149477684443e-06	Gal001	Overdominant	0.496535
rs207606	13	119016	4.78253730241101e-06	Gal001	Overdominant	0.143707
rs212126	13	311235	5.59919549148048e-06	Gal001	Overdominant	0.174603
rs104092	7	547208	5.74048991488225e-06	Gal001	Overdominant	0.266865
rs140718	9	399624	6.13195204580432e-06	Gal001	Overdominant	0.055005
rs27818	3	131069	7.19273930215607e-06	Gal001	Overdominant	0.0291751
rs206446	13	76723	7.6492726237113e-06	Gal001	Overdominant	0.086548
rs185738	12	264080	6.23153260173852e-12	Gal10	Overdominant
rs76927	5	304581	8.11341782936967e-12	Gal10	Overdominant	0.0024728
rs292882	16	825124	1.11568397405822e-11	Gal10	Overdominant	0.00249004
rs72745	5	138430	5.2286345592205e-11	Gal10	Overdominant	0.0232919
rs254165	15	326504	3.30627459636318e-10	Gal10	Overdominant	0.00247525
rs159453	10	661773	3.91161495839037e-10	Gal10	Overdominant
rs250767	15	200350	8.15867422652475e-10	Gal10	Overdominant
rs8284	2	155732	1.26112629703754e-09	Gal10	Overdominant	0.00296736
rs34597	4	97192	1.27343253015563e-09	Gal10	Overdominant	0.00296736
rs24107	2	774688	1.30216240125589e-09	Gal10	Overdominant	0.00854271
rs45352	4	501340	1.42773760591732e-09	Gal10	Overdominant	0.00197824
rs132558	9	88739	1.55647369332789e-09	Gal10	Overdominant	0.0320579
rs284868	16	482402	3.13757574997843e-09	Gal10	Overdominant	0.00247525
rs186398	12	291601	3.92441364235792e-08	Gal10	Overdominant	0.0224261
rs289684	16	679388	5.97741210034778e-08	Gal10	Overdominant
rs140807	9	402516	1.59581972957173e-07	Gal10	Overdominant	0.201485
rs212636	13	329818	3.59559973256121e-07	Gal10	Overdominant	0.0123885
rs154130	10	469113	6.47738267453041e-07	Gal10	Overdominant	0.377358
rs194771	12	669736	7.06692723844653e-07	Gal10	Overdominant	0.0276954
rs197421	12	779949	9.63969656059678e-07	Gal10	Overdominant	0.0905045
rs160831	10	727554	1.28078645503052e-06	Gal10	Overdominant	0.0348837
rs286240	16	538751	1.54944218820086e-06	Gal10	Overdominant	0.1199
rs120417	8	105589	1.56595759445268e-06	Gal10	Overdominant
rs197365	12	777784	1.73182328194605e-06	Gal10	Overdominant	0.252725
rs170238	11	340618	2.22437888340876e-06	Gal10	Overdominant	0.208911
rs187030	12	316725	2.44218968495381e-06	Gal10	Overdominant	0.0707221
rs274381	16	47770	4.13838935741272e-06	Gal10	Overdominant	0.0554455
rs46207	4	546200	4.72898420618161e-06	Gal10	Overdominant	0.0103858
rs248374	15	108561	5.00230660132674e-06	Gal10	Overdominant	0.0692384
rs71916	5	103985	5.09551006913154e-06	Gal10	Overdominant	0.0977183
rs146903	10	189457	5.42341955495686e-06	Gal10	Overdominant	0.0659341
rs290854	16	732124	5.55822697014614e-06	Gal10	Overdominant	0.062996
rs77254	5	313806	5.79902188264321e-06	Gal10	Overdominant	0.0426165
rs220563	13	651548	7.05281279961733e-06	Gal10	Overdominant
rs119588	8	69003	7.46398138832666e-06	Gal10	Overdominant
rs185738	12	264080	5.03161458111917e-13	Gal2	Overdominant
rs186398	12	291601	2.16865741746956e-11	Gal2	Overdominant	0.0224261
rs286655	16	558141	1.06720910741995e-09	Gal2	Overdominant	0.078869
rs141084	9	408854	1.50261033018872e-09	Gal2	Overdominant	0.181188
rs12030	2	322182	4.88697189890006e-09	Gal2	Overdominant	0.109235
rs259435	15	507156	1.38355763280112e-08	Gal2	Overdominant	0.211386
rs286240	16	538751	1.45943314188242e-08	Gal2	Overdominant	0.1199
rs197365	12	777784	1.63495719761385e-08	Gal2	Overdominant	0.252725
rs11311	2	296198	4.63023197152121e-08	Gal2	Overdominant	0.0911794
rs289189	16	657943	6.38985458461545e-08	Gal2	Overdominant	0.0222993
rs98047	7	314032	9.0456906861047e-08	Gal2	Overdominant	0.237599
rs160831	10	727554	9.28806598503271e-08	Gal2	Overdominant	0.0348837
rs131118	9	34681	1.06683329405717e-07	Gal2	Overdominant	0.00254065
rs116094	7	1004751	1.23762781115567e-07	Gal2	Overdominant	0.0846535
rs272	1	33403	2.24324396437659e-07	Gal2	Overdominant
rs289684	16	679388	3.67344796304941e-07	Gal2	Overdominant
rs259275	15	500893	5.80807869403308e-07	Gal2	Overdominant	0.135509
rs121165	8	133011	5.98736415994954e-07	Gal2	Overdominant	0.0156883
rs85895	6	101439	7.87338601902095e-07	Gal2	Overdominant
rs248374	15	108561	8.28891001609192e-07	Gal2	Overdominant	0.0692384
rs160832	10	727569	8.58001559939233e-07	Gal2	Overdominant	0.00257998
rs154130	10	469113	9.3200899803688e-07	Gal2	Overdominant	0.377358
rs281164	16	324393	1.70341449319627e-06	Gal2	Overdominant	0.121407
rs118703	8	41487	1.7566018214921e-06	Gal2	Overdominant	0.124629
rs99168	7	347577	1.80776346155934e-06	Gal2	Overdominant	0.0128586
rs212636	13	329818	1.87240074755048e-06	Gal2	Overdominant	0.0123885
rs126979	8	372393	1.93166504157298e-06	Gal2	Overdominant	0.236842
rs248929	15	133464	2.27897797311035e-06	Gal2	Overdominant	0.0361029
rs130555	8	509257	2.33490489368919e-06	Gal2	Overdominant
rs8916	2	182499	5.42416149858309e-06	Gal2	Overdominant	0.0608309
rs137715	9	290469	5.70746824773597e-06	Gal2	Overdominant	0.107426
rs73601	5	173763	6.50913679075962e-06	Gal2	Overdominant	0.263736
rs58446	4	1051775	8.15111097590337e-06	Gal2	Overdominant	0.454906
rs82114	5	521308	9.22873680961436e-08	Glu001	Overdominant	0.153
rs203961	12	1040530	2.06873330697808e-07	Glu001	Overdominant	0.0223436
rs146288	10	163052	1.87355896493045e-06	Glu001	Overdominant	0.221011
rs140155	9	386312	2.31202540703584e-06	Glu001	Overdominant	0.114141
rs211123	13	266926	2.46113046296593e-06	Glu001	Overdominant	0.0833333
rs139684	9	371957	4.18345013578498e-06	Glu001	Overdominant	0.200596
rs244510	14	716711	2.60627678341221e-06	Glu10	Overdominant	0.12248
rs115697	7	991971	6.02575682359977e-06	Glu10	Overdominant
rs72715	5	136893	9.97872112023581e-06	Glu10	Overdominant	0.0115462
rs56416	4	957178	1.07175280270054e-05	Glu10	Overdominant	0.0539604
rs198585	12	814018	1.33640340047249e-05	Glu10	Overdominant	0.0158259
rs135009	9	182402	6.08159673630457e-14	Gly001	Overdominant	0.193261
rs263513	15	671651	5.13052500931136e-12	Gly001	Overdominant	0.135189
rs113064	7	895337	2.15133392439114e-10	Gly001	Overdominant	0.144906
rs113059	7	895204	2.15133392439114e-10	Gly001	Overdominant	0.142361
rs39092	4	282713	2.69373870902121e-10	Gly001	Overdominant	0.187314
rs27818	3	131069	4.22419543267848e-10	Gly001	Overdominant	0.0291751
rs263677	15	675329	4.46467940463588e-10	Gly001	Overdominant	0.112626
rs71916	5	103985	1.13000872711057e-09	Gly001	Overdominant	0.0977183
rs119909	8	78680	1.86153215505057e-09	Gly001	Overdominant	0.0774578
rs194341	12	645374	2.94861627558722e-09	Gly001	Overdominant	0.0163205
rs25020	2	803204	4.17561646013599e-09	Gly001	Overdominant	0.0273605
rs25019	2	803201	4.17561646013599e-09	Gly001	Overdominant	0.0208556
rs116780	7	1029537	4.47130782941808e-09	Gly001	Overdominant	0.153808
rs250542	15	189469	5.3206268234986e-09	Gly001	Overdominant	0.153361
rs16505	2	501746	6.00901086790453e-09	Gly001	Overdominant
rs249990	15	169582	6.09036301774255e-09	Gly001	Overdominant	0.0133796
rs117265	7	1050159	7.667378779134e-09	Gly001	Overdominant	0.219307
rs117266	7	1050164	7.667378779134e-09	Gly001	Overdominant	0.219307
rs114170	7	938963	7.94765369636999e-09	Gly001	Overdominant	0.0702275
rs206217	13	69500	9.46786304569577e-09	Gly001	Overdominant	0.267857
rs53317	4	825844	1.03264455015723e-08	Gly001	Overdominant
rs88281	6	196332	1.36537264484148e-08	Gly001	Overdominant	0.170961
rs140289	9	389038	3.90403382017522e-08	Gly001	Overdominant	0.065239
rs62805	4	1252379	4.70467763548853e-08	Gly001	Overdominant	0.159564
rs62794	4	1252149	4.70467763548853e-08	Gly001	Overdominant	0.163205
rs72688	5	134351	4.96065177342182e-08	Gly001	Overdominant	0.111881
rs211123	13	266926	8.38958262028721e-08	Gly001	Overdominant	0.0833333
rs51423	4	732994	9.50066271694498e-08	Gly001	Overdominant
rs146288	10	163052	9.73770406552388e-08	Gly001	Overdominant	0.221011
rs32348	3	299137	1.00306376088614e-07	Gly001	Overdominant	0.189402
rs134766	9	174307	1.24274494023274e-07	Gly001	Overdominant
rs68564	4	1468839	1.31622015189913e-07	Gly001	Overdominant	0.126858
rs135771	9	217612	1.38878755291568e-07	Gly001	Overdominant	0.118812
rs273846	16	30529	1.44290810717614e-07	Gly001	Overdominant	0.122894
rs14308	2	407778	1.4900112190742e-07	Gly001	Overdominant	0.258416
rs13306	2	366047	1.49263589343478e-07	Gly001	Overdominant	0.168317
rs203961	12	1040530	1.95733846324422e-07	Gly001	Overdominant	0.0223436
rs171451	11	377774	2.1092911012218e-07	Gly001	Overdominant	0.150346
rs217635	13	542119	2.16883640431685e-07	Gly001	Overdominant	0.359484
rs182362	12	139755	2.50490083328801e-07	Gly001	Overdominant	0.126858
rs182747	12	155280	2.78119123871623e-07	Gly001	Overdominant	0.116716
rs146882	10	189048	3.29116469801507e-07	Gly001	Overdominant
rs185729	12	263502	4.12163881932291e-07	Gly001	Overdominant	0.271287
rs261217	15	584081	4.34177037519459e-07	Gly001	Overdominant	0.0610119
rs254823	15	348524	4.53930374400632e-07	Gly001	Overdominant	0.0910891
rs23378	2	751226	4.94822326357446e-07	Gly001	Overdominant
rs223647	13	772345	5.13940730888222e-07	Gly001	Overdominant	0.146329
rs180320	12	74960	5.18166459094466e-07	Gly001	Overdominant	0.0222552
rs217017	13	514327	6.27199596858e-07	Gly001	Overdominant	0.389831
rs197478	12	782839	6.57214115622135e-07	Gly001	Overdominant
rs206446	13	76723	6.93399816521645e-07	Gly001	Overdominant	0.086548
rs140718	9	399624	7.08949845802051e-07	Gly001	Overdominant	0.055005
rs129212	8	461959	7.53571021430591e-07	Gly001	Overdominant	0.216203
rs71388	5	86855	7.95013917980113e-07	Gly001	Overdominant	0.0870425
rs252168	15	253998	8.76174402544817e-07	Gly001	Overdominant	0.204163
rs53463	4	831993	9.69855699766829e-07	Gly001	Overdominant	0.0914936
rs64583	4	1318331	1.00372629841444e-06	Gly001	Overdominant	0.383663
rs32975	4	49039	1.01337384722135e-06	Gly001	Overdominant	0.0019802
rs265071	15	735873	1.03794649895379e-06	Gly001	Overdominant	0.4222
rs74582	5	212444	1.06192138139033e-06	Gly001	Overdominant	0.0173267
rs238241	14	435739	1.268179815487e-06	Gly001	Overdominant	0.162698
rs172119	11	402648	1.50447917129849e-06	Gly001	Overdominant	0.00692384
rs274904	16	75389	1.64405317946551e-06	Gly001	Overdominant	0.0539604
rs250556	15	189700	1.74163776307507e-06	Gly001	Overdominant	0.169475
rs180245	12	72756	1.79450496560501e-06	Gly001	Overdominant	0.0820969
rs39165	4	285234	2.03963837963907e-06	Gly001	Overdominant	0.0832507
rs207845	13	127104	2.25426786269956e-06	Gly001	Overdominant	0.114243
rs217617	13	541716	2.58880753808138e-06	Gly001	Overdominant	0.378352
rs221274	13	681615	2.70151688476686e-06	Gly001	Overdominant	0.200495
rs232421	14	208554	2.77979893566814e-06	Gly001	Overdominant	0.152475
rs67884	4	1446482	3.79282925401466e-06	Gly001	Overdominant	0.319307
rs238559	14	446677	4.3377944826317e-06	Gly001	Overdominant	0.127228
rs112755	7	888397	4.44735956678676e-06	Gly001	Overdominant	0.208416
rs140890	9	404274	4.65611456221642e-06	Gly001	Overdominant	0.144059
rs280939	16	311970	4.75837560851778e-06	Gly001	Overdominant	0.0563798
rs161091	11	11751	5.29789209242111e-06	Gly001	Overdominant	0.234375
rs113898	7	925154	5.30662819818716e-06	Gly001	Overdominant	0.0450049
rs183611	12	185035	5.47404896237515e-06	Gly001	Overdominant	0.0422046
rs179641	12	48173	5.62591387701634e-06	Gly001	Overdominant	0.107319
rs124999	8	287342	5.79240897510157e-06	Gly001	Overdominant	0.063745
rs39376	4	293190	7.43003139963153e-06	Gly001	Overdominant
rs71201	5	80541	7.60186664105495e-06	Gly001	Overdominant	0.276459
rs120878	8	122857	7.77798522503547e-06	Gly001	Overdominant
rs192747	12	571772	7.8463756108077e-06	Gly001	Overdominant	0.255446
rs135150	9	187970	7.89497812644144e-06	Gly001	Overdominant
rs23176	2	742620	8.79143894147226e-06	Gly001	Overdominant	0.108135
rs236279	14	365852	8.91161424210385e-06	Gly001	Overdominant	0.0108803
rs250278	15	180162	9.29132370827758e-06	Gly001	Overdominant	0.0856436
rs254288	15	331767	9.55861095851161e-06	Gly001	Overdominant	0.0460852
rs124171	8	248907	9.68823381909067e-06	Gly001	Overdominant	0.0534653
rs168084	11	273017	9.71568582422378e-06	Gly001	Overdominant	0.0910891
rs144355	10	95205	5.0146200533541e-09	Gly10	Overdominant	0.114583
rs83880	6	34967	6.35090304724578e-09	Gly10	Overdominant	0.0529703
rs261413	15	590260	2.60856405251193e-07	Gly10	Overdominant	0.0158259
rs100324	7	391279	5.29522809538952e-07	Gly10	Overdominant	0.105836
rs203961	12	1040530	5.93015069649937e-07	Gly10	Overdominant	0.0223436
rs39092	4	282713	8.54417240187846e-07	Gly10	Overdominant	0.187314
rs229563	14	90031	1.03711086900672e-06	Gly10	Overdominant	0.187624
rs131146	9	37646	1.19237884910237e-06	Gly10	Overdominant	0.0329557
rs14580	2	418404	1.44438168920963e-06	Gly10	Overdominant	0.0855721
rs268249	15	852538	1.59963514409018e-06	Gly10	Overdominant	0.0272277
rs219075	13	586795	1.97007550507318e-06	Gly10	Overdominant
rs146859	10	188153	2.38137890200845e-06	Gly10	Overdominant	0.161386
rs60839	4	1161568	3.41335925992884e-06	Gly10	Overdominant
rs30135	3	225343	3.48256161056085e-06	Gly10	Overdominant	0.042
rs76593	5	283533	3.55264633173352e-06	Gly10	Overdominant	0.0660661
rs293103	16	835149	3.841296180747e-06	Gly10	Overdominant	0.382851
rs135771	9	217612	4.31681492261174e-06	Gly10	Overdominant	0.118812
rs53399	4	829373	5.19024679286944e-06	Gly10	Overdominant	0.496535
rs147481	10	219575	6.23010655887225e-06	Gly10	Overdominant
rs148317	10	248754	6.23010655887225e-06	Gly10	Overdominant	0.0747525
rs88201	6	193671	6.98365770147231e-06	Gly10	Overdominant	0.193261
rs60839	4	1161568	8.69933187865876e-08	Gly2	Overdominant
rs119412	8	62723	5.71395509735879e-07	Gly2	Overdominant	0.245536
rs197799	12	793293	7.68230716604546e-07	Gly2	Overdominant	0.248713
rs174626	11	506607	1.56266256395946e-06	Gly2	Overdominant	0.0802775
rs211728	13	295428	1.71266632699292e-06	Gly2	Overdominant	0.439109
rs144355	10	95205	3.5688105495728e-06	Gly2	Overdominant	0.114583
rs83880	6	34967	4.14492251571513e-06	Gly2	Overdominant	0.0529703
rs261375	15	589040	5.8590164186654e-06	Gly2	Overdominant	0.110781
rs247646	15	83018	8.17591644854223e-06	Gly2	Overdominant	0.125124
rs258651	15	479604	1.23387735366975e-05	Gly2	Overdominant	0.449304
rs147481	10	219575	1.3178025018785e-05	Gly2	Overdominant
rs148317	10	248754	1.3178025018785e-05	Gly2	Overdominant	0.0747525
rs166328	11	204491	1.35344163343851e-05	Gly2	Overdominant	0.411474
rs31421	3	271337	7.97636067059913e-11	Keto10	Overdominant	0.155941
rs32758	4	38200	6.01069252460257e-08	Keto10	Overdominant	0.272997
rs197703	12	791024	6.73538643746945e-08	Keto10	Overdominant	0.183217
rs174383	11	498054	1.01271340331756e-07	Keto10	Overdominant	0.0237624
rs198585	12	814018	1.21803827806273e-07	Keto10	Overdominant	0.0158259
rs293040	16	830701	1.65849263170294e-07	Keto10	Overdominant	0.112438
rs51518	4	738776	1.74986295731544e-07	Keto10	Overdominant	0.204163
rs136555	9	250581	1.90412857196849e-07	Keto10	Overdominant	0.40377
rs12103	2	323896	5.2578341809931e-07	Keto10	Overdominant	0.0308458
rs118392	8	31313	9.6438839197599e-07	Keto10	Overdominant	0.127228
rs131561	9	53860	1.32675156884457e-06	Keto10	Overdominant	0.29782
rs4894	2	15901	1.37860882255075e-06	Keto10	Overdominant	0.202275
rs280603	16	296884	2.39572511821095e-06	Keto10	Overdominant	0.169307
rs116372	7	1012575	2.5103098879634e-06	Keto10	Overdominant	0.235644
rs26879	3	80173	2.70539211251974e-06	Keto10	Overdominant
rs26237	3	56674	2.83872837741635e-06	Keto10	Overdominant	0.146184
rs280091	16	276463	2.84297230727192e-06	Keto10	Overdominant	0.145401
rs121493	8	144266	3.11109986499766e-06	Keto10	Overdominant	0.20199
rs153008	10	421100	3.30815628880149e-06	Keto10	Overdominant	0.329208
rs63451	4	1276306	4.06918011776384e-06	Keto10	Overdominant	0.0811078
rs185738	12	264080	4.34106332964996e-06	Keto10	Overdominant
rs53114	4	817489	6.377176013895e-06	Keto10	Overdominant	0.2111
rs139860	9	379413	6.62977680416639e-06	Keto10	Overdominant	0.158911
rs182947	12	163665	6.73260231373566e-06	Keto10	Overdominant	0.0644841
rs127317	8	383316	7.14034242653142e-06	Keto10	Overdominant	0.1556
rs289723	16	680526	7.37594292413069e-06	Keto10	Overdominant	0.30288
rs222273	13	718921	7.65936116656749e-06	Keto10	Overdominant	0.0608309
rs222264	13	718665	7.65936116656749e-06	Keto10	Overdominant
rs160275	10	698466	9.11857017510963e-06	Keto10	Overdominant	0.252725
rs185224	12	245833	9.20918522647585e-06	Keto10	Overdominant	0.106825
rs99778	7	370476	1.01471154386123e-05	Keto10	Overdominant	0.399105
rs123384	8	218189	1.05491412373095e-05	Keto10	Overdominant	0.106256
rs198081	12	803025	2.23932999553611e-08	Keto30	Overdominant	0.0831683
rs198063	12	802466	2.23932999553611e-08	Keto30	Overdominant	0.0885262
rs198585	12	814018	2.72143648704453e-06	Keto30	Overdominant	0.0158259
rs280173	16	280596	2.87247760633082e-06	Keto30	Overdominant	0.103072
rs131118	9	34681	6.1762111122912e-06	Keto30	Overdominant	0.00254065
rs293040	16	830701	6.29282331023292e-06	Keto30	Overdominant	0.112438
rs176592	11	580625	7.73269585321018e-06	Keto30	Overdominant
rs292788	16	821462	8.43623815111741e-06	Keto30	Overdominant	0.00497018
rs104941	7	592987	8.60150843238915e-06	Keto30	Overdominant	0.222552
rs257578	15	440271	1.28449226698831e-05	Keto30	Overdominant	0.123885
rs172122	11	402723	1.59072270436153e-05	Keto30	Overdominant
rs198063	12	802466	4.24813035004655e-09	Keto60	Overdominant	0.0885262
rs198081	12	803025	4.24813035004655e-09	Keto60	Overdominant	0.0831683
rs280173	16	280596	6.33934351618568e-09	Keto60	Overdominant	0.103072
rs131118	9	34681	5.91968541677739e-07	Keto60	Overdominant	0.00254065
rs104941	7	592987	8.31600158474682e-07	Keto60	Overdominant	0.222552
rs44210	4	466362	1.48756717991184e-06	Keto60	Overdominant	0.0465808
rs116094	7	1004751	1.75396271153639e-06	Keto60	Overdominant	0.0846535
rs223905	13	782221	1.8247868622064e-06	Keto60	Overdominant	0.0913605
rs176592	11	580625	1.96383241384089e-06	Keto60	Overdominant
rs91655	7	64392	2.70612267712675e-06	Keto60	Overdominant
rs167786	11	259742	5.28054053162598e-06	Keto60	Overdominant	0.0129741
rs287677	16	597046	9.63711808857915e-06	Keto60	Overdominant	0.128968
rs130713	8	515104	1.05405171023556e-05	Keto60	Overdominant	0.20664
rs293040	16	830701	1.17510196738313e-05	Keto60	Overdominant	0.112438
rs198585	12	814018	1.27699390563702e-05	Keto60	Overdominant	0.0158259
rs172119	11	402648	1.24562790900071e-10	MethylViologen05	Overdominant	0.00692384
rs53357	4	827443	1.18397502507981e-07	MethylViologen05	Overdominant
rs53355	4	827425	1.18397502507981e-07	MethylViologen05	Overdominant	0.10796
rs25019	2	803201	3.18833888732814e-07	MethylViologen05	Overdominant	0.0208556
rs25020	2	803204	3.18833888732814e-07	MethylViologen05	Overdominant	0.0273605
rs146882	10	189048	7.09187717383392e-07	MethylViologen05	Overdominant
rs113059	7	895204	1.01169408822776e-06	MethylViologen05	Overdominant	0.142361
rs113064	7	895337	1.01169408822776e-06	MethylViologen05	Overdominant	0.144906
rs88433	6	202548	1.25728296224049e-06	MethylViologen05	Overdominant	0.10555
rs254164	15	326498	1.49920260942273e-06	MethylViologen05	Overdominant	0.00148662
rs24064	2	772699	2.12342462035648e-06	MethylViologen05	Overdominant	0.204455
rs113163	7	898342	2.13545985967652e-06	MethylViologen05	Overdominant	0.118317
rs80694	5	463250	2.8294326905229e-06	MethylViologen05	Overdominant	0.120178
rs34414	4	90424	3.21602516654334e-06	MethylViologen05	Overdominant	0.187438
rs206630	13	82881	3.89970637945659e-06	MethylViologen05	Overdominant	0.117211
rs74582	5	212444	4.46839334184104e-06	MethylViologen05	Overdominant	0.0173267
rs58390	4	1049568	4.80187932069568e-06	MethylViologen05	Overdominant	0.252004
rs283715	16	431914	5.02933425505148e-06	MethylViologen05	Overdominant
rs135453	9	199162	5.04393652629008e-06	MethylViologen05	Overdominant	0.0980198
rs292739	16	819161	5.33015465076007e-06	MethylViologen05	Overdominant	0.148756
rs9498	2	205834	5.35492803524144e-06	MethylViologen05	Overdominant	0.247264
rs262616	15	639445	6.25943776709882e-06	MethylViologen05	Overdominant
rs34694	4	100317	6.57571185611458e-06	MethylViologen05	Overdominant
rs53356	4	827442	7.57040377047105e-06	MethylViologen05	Overdominant	0.46425
rs160017	10	686698	7.92876705210941e-06	MethylViologen05	Overdominant	0.142433
rs80665	5	462407	1.09733402348199e-05	MethylViologen05	Overdominant	0.220792
rs69697	5	28380	1.22644477438707e-05	MethylViologen05	Overdominant	0.030754
rs34717	4	101117	1.37347608788498e-05	MethylViologen05	Overdominant
rs53355	4	827425	5.30314810493157e-07	MethylViologen1	Overdominant	0.10796
rs53357	4	827443	5.30314810493157e-07	MethylViologen1	Overdominant
rs80694	5	463250	8.40873881558806e-07	MethylViologen1	Overdominant	0.120178
rs88433	6	202548	9.86386223139738e-07	MethylViologen1	Overdominant	0.10555
rs283715	16	431914	1.20158617130534e-06	MethylViologen1	Overdominant
rs160017	10	686698	1.66176250495681e-06	MethylViologen1	Overdominant	0.142433
rs172119	11	402648	5.11806043963827e-09	MethylViologen25	Overdominant	0.00692384
rs53357	4	827443	1.94907188001522e-08	MethylViologen25	Overdominant
rs53355	4	827425	1.94907188001522e-08	MethylViologen25	Overdominant	0.10796
rs278285	16	208747	1.02466589925032e-06	MethylViologen25	Overdominant	0.359267
rs83235	5	557490	1.31383442178323e-06	MethylViologen25	Overdominant	0.349505
rs113059	7	895204	1.38652124946773e-06	MethylViologen25	Overdominant	0.142361
rs113064	7	895337	1.38652124946773e-06	MethylViologen25	Overdominant	0.144906
rs160017	10	686698	1.58599993701147e-06	MethylViologen25	Overdominant	0.142433
rs24064	2	772699	3.42796664205756e-06	MethylViologen25	Overdominant	0.204455
rs113163	7	898342	3.47003557987755e-06	MethylViologen25	Overdominant	0.118317
rs69697	5	28380	4.47043072022631e-06	MethylViologen25	Overdominant	0.030754
rs25019	2	803201	4.55711829565312e-06	MethylViologen25	Overdominant	0.0208556
rs25020	2	803204	4.55711829565312e-06	MethylViologen25	Overdominant	0.0273605
rs34414	4	90424	4.57128441816851e-06	MethylViologen25	Overdominant	0.187438
rs146882	10	189048	5.01050592732843e-06	MethylViologen25	Overdominant
rs262616	15	639445	5.11518528415639e-06	MethylViologen25	Overdominant
rs88433	6	202548	5.17183181111441e-06	MethylViologen25	Overdominant	0.10555
rs34694	4	100317	5.18910170659419e-06	MethylViologen25	Overdominant
rs206630	13	82881	6.05830839776012e-06	MethylViologen25	Overdominant	0.117211
rs80665	5	462407	1.09794954116939e-05	MethylViologen25	Overdominant	0.220792
rs80694	5	463250	1.26618503251989e-05	MethylViologen25	Overdominant	0.120178
rs283715	16	431914	1.38897358068399e-05	MethylViologen25	Overdominant
rs24222	2	780187	2.3240225977573e-08	NaCl05	Overdominant
rs91099	7	42019	2.8725573388313e-08	NaCl05	Overdominant	0.263917
rs72918	5	145118	2.89635047476973e-08	NaCl05	Overdominant	0.0965347
rs152296	10	391307	6.52165171927565e-08	NaCl05	Overdominant	0.423956
rs101770	7	452691	6.81012691894105e-08	NaCl05	Overdominant	0.0392254
rs232791	14	225989	6.94385453871199e-08	NaCl05	Overdominant	0.0683168
rs199655	12	853556	2.4192678521889e-07	NaCl05	Overdominant	0.1182
rs284020	16	451153	3.4347476737226e-07	NaCl05	Overdominant	0.152087
rs3811	1	166931	4.05127189590278e-07	NaCl05	Overdominant	0.435149
rs271262	15	982145	4.14366063080096e-07	NaCl05	Overdominant
rs152315	10	391774	4.78025256782807e-07	NaCl05	Overdominant	0.0663366
rs55710	4	930409	6.71028484553093e-07	NaCl05	Overdominant	0.45
rs129991	8	489460	7.67927714661481e-07	NaCl05	Overdominant	0.0450049
rs233476	14	258010	7.68878962920405e-07	NaCl05	Overdominant	0.459325
rs29695	3	210666	1.02243183802543e-06	NaCl05	Overdominant	0.18781
rs238996	14	466583	1.53977836012899e-06	NaCl05	Overdominant	0.0485629
rs127362	8	385228	1.88877126237165e-06	NaCl05	Overdominant
rs2876	1	121280	1.91987832235593e-06	NaCl05	Overdominant	0.221506
rs73960	5	187642	2.2119880550321e-06	NaCl05	Overdominant	0.324405
rs66162	4	1386920	2.67084888990294e-06	NaCl05	Overdominant	0.384273
rs133429	9	124530	2.92423614219359e-06	NaCl05	Overdominant	0.103858
rs230982	14	148331	3.45303033304586e-06	NaCl05	Overdominant	0.223489
rs25802	3	40089	3.64635942162002e-06	NaCl05	Overdominant	0.143917
rs290719	16	725291	3.95999366261798e-06	NaCl05	Overdominant	0.0406746
rs204978	13	26589	4.30940031597974e-06	NaCl05	Overdominant
rs152907	10	416446	6.07241788587562e-06	NaCl05	Overdominant	0.0795
rs213062	13	350820	6.15031889608923e-06	NaCl05	Overdominant	0.190783
rs3799	1	166571	7.68017963563448e-06	NaCl05	Overdominant	0.496028
rs233791	14	271098	7.78814207865726e-06	NaCl05	Overdominant	0.208911
rs231870	14	186675	8.25407855176949e-06	NaCl05	Overdominant	0.216617
rs28991	3	183635	9.8333883020123e-06	NaCl05	Overdominant	0.099505
rs84108	6	41068	1.01613890965582e-05	NaCl05	Overdominant	0.184341
rs270258	15	932327	1.08224776330986e-05	NaCl05	Overdominant	0.0595829
rs65199	4	1342134	8.00505528395428e-07	NaCl1	Overdominant	0.132047
rs140091	9	385630	8.27426531608502e-07	NaCl1	Overdominant	0.0724276
rs251655	15	233394	9.10316324604233e-07	NaCl1	Overdominant	0.127596
rs286655	16	558141	1.02155722357268e-06	NaCl1	Overdominant	0.078869
rs159678	10	672143	1.04697065713023e-06	NaCl1	Overdominant	0.0816832
rs141084	9	408854	1.09677446186902e-06	NaCl1	Overdominant	0.181188
rs294323	16	893345	2.23967781348359e-06	NaCl1	Overdominant	0.175944
rs254984	15	353257	2.33701877793125e-06	NaCl1	Overdominant	0.0707221
rs251371	15	223578	2.33701877793125e-06	NaCl1	Overdominant	0.0469832
rs130820	8	518542	2.71122588257852e-06	NaCl1	Overdominant	0.363095
rs136555	9	250581	3.86498508545516e-06	NaCl1	Overdominant	0.40377
rs86329	6	121054	8.05439442526642e-06	NaCl1	Overdominant	0.145337
rs119715	8	72925	1.05618806869934e-05	NaCl1	Overdominant	0.476143
rs239	1	32776	1.29466578891735e-05	NaCl1	Overdominant	0.26321
rs294289	16	892115	1.54438591509818e-05	NaCl1	Overdominant	0.259204
rs63869	4	1291676	1.65538545800996e-07	SMA1	Overdominant	0.150495
rs51354	4	730085	2.55592940710975e-07	SMA1	Overdominant	0.253472
rs272817	15	1039786	2.89254599653873e-07	SMA1	Overdominant	0.195738
rs272809	15	1039586	2.89254599653873e-07	SMA1	Overdominant	0.164519
rs148317	10	248754	2.92908785287247e-07	SMA1	Overdominant	0.0747525
rs147481	10	219575	2.92908785287247e-07	SMA1	Overdominant
rs131076	9	31244	5.83659126052719e-07	SMA1	Overdominant	0.0061287
rs39798	4	311231	6.00092092428585e-07	SMA1	Overdominant	0.177083
rs39370	4	292985	6.00092092428585e-07	SMA1	Overdominant	0.310516
rs17566	2	539981	6.66426407016991e-07	SMA1	Overdominant	0.189604
rs173374	11	461853	8.73234806199581e-07	SMA1	Overdominant	0.135149
rs109599	7	766345	1.02611433412053e-06	SMA1	Overdominant	0.100099
rs74623	5	214187	1.05101926910465e-06	SMA1	Overdominant	0.0821782
rs280944	16	312405	1.14499007033779e-06	SMA1	Overdominant	0.170466
rs192261	12	548551	1.20583075211007e-06	SMA1	Overdominant	0.108911
rs192256	12	548327	1.20583075211007e-06	SMA1	Overdominant	0.109019
rs38983	4	277639	1.38835465183393e-06	SMA1	Overdominant	0.156436
rs77427	5	320500	1.47109263925859e-06	SMA1	Overdominant	0.166172
rs112512	7	880304	1.68778767156782e-06	SMA1	Overdominant	0.142574
rs101924	7	459691	1.7562182739269e-06	SMA1	Overdominant	0.20396
rs135662	9	213605	1.87190969193809e-06	SMA1	Overdominant	0.200893
rs68036	4	1450091	2.09719871204749e-06	SMA1	Overdominant	0.106436
rs39376	4	293190	2.45140537956468e-06	SMA1	Overdominant
rs260571	15	554117	2.52954524826664e-06	SMA1	Overdominant	0.0882061
rs233639	14	264468	2.59268313557573e-06	SMA1	Overdominant	0.232904
rs228186	14	33272	2.63982276984189e-06	SMA1	Overdominant
rs46910	4	566734	3.23410800846647e-06	SMA1	Overdominant	0.241551
rs24997	2	801410	3.42200210818842e-06	SMA1	Overdominant
rs147662	10	226817	3.67006326608377e-06	SMA1	Overdominant	0.114356
rs212003	13	307796	4.28695642649589e-06	SMA1	Overdominant	0.0832507
rs62088	4	1221065	4.60345386528808e-06	SMA1	Overdominant	0.333663
rs244510	14	716711	5.31145758802928e-06	SMA1	Overdominant	0.12248
rs200735	12	897689	5.36750211248539e-06	SMA1	Overdominant	0.244554
rs203163	12	1008420	5.57830654494119e-06	SMA1	Overdominant	0.240356
rs174870	11	515627	5.75661278621993e-06	SMA1	Overdominant	0.0956392
rs38888	4	274922	5.87384459600132e-06	SMA1	Overdominant	0.171131
rs103157	7	506941	6.12129554721613e-06	SMA1	Overdominant
rs100384	7	393110	6.12129554721613e-06	SMA1	Overdominant	0.203465
rs120371	8	104461	6.24552137805277e-06	SMA1	Overdominant	0.20099
rs264456	15	702764	6.52283743991417e-06	SMA1	Overdominant	0.100396
rs206446	13	76723	7.67192466794195e-06	SMA1	Overdominant	0.086548
rs245646	14	751985	8.51597325538506e-06	SMA1	Overdominant	0.0222222
rs27826	3	131209	8.79182757714626e-06	SMA1	Overdominant	0.0256539
rs48579	4	620108	8.94522154193829e-06	SMA1	Overdominant	0.0273003
rs291684	16	769898	9.17019090608671e-06	SMA1	Overdominant	0.0842754
rs140718	9	399624	9.2886398276044e-06	SMA1	Overdominant	0.055005
rs225755	13	856275	9.46042222992092e-06	SMA1	Overdominant	0.169147
rs228512	14	46130	9.51585814409062e-06	SMA1	Overdominant	0.24802
rs98739	7	334364	1.00684438726052e-05	SMA1	Overdominant	0.195545
rs203599	12	1026263	1.02988120788442e-05	SMA1	Overdominant
rs85423	6	87527	1.0575708465341e-05	SMA1	Overdominant	0.0340681
rs27806	3	130883	1.14467118133658e-05	SMA1	Overdominant	0.061245
rs157673	10	608184	1.42522743682375e-05	SMA1	Overdominant	0.225919
rs157685	10	608323	1.42522743682375e-05	SMA1	Overdominant	0.230959
rs205914	13	60662	1.94489978175894e-05	SMA1	Overdominant	0.0578635
rs200653	12	893651	1.95143943541084e-05	SMA1	Overdominant	0.109901
rs95784	7	217417	2.0090481795219e-05	SMA1	Overdominant	0.0727723
rs136400	9	245601	2.03863343965494e-05	SMA1	Overdominant	0.167526
rs228438	14	43259	2.25280002928567e-05	SMA1	Overdominant	0.21493
rs73814	5	182701	2.39427929507129e-05	SMA1	Overdominant	0.22664
rs272286	15	1020013	2.54141399600866e-05	SMA1	Overdominant	0.17458
rs67884	4	1446482	2.63507898471905e-05	SMA1	Overdominant	0.319307
rs46129	4	545047	2.71069575246094e-05	SMA1	Overdominant	0.0666004
rs50044	4	680423	2.85823583398895e-05	SMA1	Overdominant	0.159901
rs50047	4	680490	2.85823583398895e-05	SMA1	Overdominant	0.160059
rs263470	15	670328	2.89735679490225e-05	SMA1	Overdominant	0.140159
rs251162	15	214734	2.89735679490225e-05	SMA1	Overdominant	0.144135
rs280944	16	312405	1.25578704562999e-14	SMA25	Overdominant	0.170466
rs140718	9	399624	8.63715444521498e-14	SMA25	Overdominant	0.055005
rs206446	13	76723	1.14166082502112e-13	SMA25	Overdominant	0.086548
rs228352	14	40306	6.58642999632485e-10	SMA25	Overdominant	0.223489
rs131076	9	31244	6.71534831993513e-10	SMA25	Overdominant	0.0061287
rs158271	10	623311	1.08964447790912e-09	SMA25	Overdominant	0.166337
rs89330	6	236281	1.39071638489252e-09	SMA25	Overdominant
rs119197	8	55762	1.66862726902149e-09	SMA25	Overdominant	0.0985149
rs46734	4	561050	3.44265960781461e-09	SMA25	Overdominant	0.0268763
rs245646	14	751985	9.82994758515843e-09	SMA25	Overdominant	0.0222222
rs239	1	32776	9.88158464173011e-09	SMA25	Overdominant	0.26321
rs85423	6	87527	1.00525654618737e-08	SMA25	Overdominant	0.0340681
rs17566	2	539981	1.28766308746286e-08	SMA25	Overdominant	0.189604
rs27826	3	131209	2.08826922326641e-08	SMA25	Overdominant	0.0256539
rs3456	1	144077	3.28295885675601e-08	SMA25	Overdominant
rs42744	4	413192	5.83627052056859e-08	SMA25	Overdominant	0.0741117
rs134907	9	178111	7.26793140593233e-08	SMA25	Overdominant	0.100099
rs27806	3	130883	7.7371739792956e-08	SMA25	Overdominant	0.061245
rs182864	12	159822	8.3771889242706e-08	SMA25	Overdominant	0.0569307
rs280593	16	296420	8.41750098458593e-08	SMA25	Overdominant	0.183168
rs95599	7	209279	8.56620537922278e-08	SMA25	Overdominant	0.20396
rs206270	13	71390	8.97733206272731e-08	SMA25	Overdominant	0.09545
rs277012	16	162203	9.01659512688894e-08	SMA25	Overdominant	0.155412
rs277007	16	161945	9.01659512688894e-08	SMA25	Overdominant	0.163366
rs29779	3	214126	9.46819425693932e-08	SMA25	Overdominant	0.20199
rs180864	12	92233	1.00632795890885e-07	SMA25	Overdominant	0.233801
rs39376	4	293190	1.29616386331053e-07	SMA25	Overdominant
rs124913	8	284348	1.40379619689638e-07	SMA25	Overdominant	0.0464886
rs244510	14	716711	1.41130782357809e-07	SMA25	Overdominant	0.12248
rs212003	13	307796	1.58581382865966e-07	SMA25	Overdominant	0.0832507
rs98739	7	334364	1.9191198815031e-07	SMA25	Overdominant	0.195545
rs244727	14	724724	2.17582425281775e-07	SMA25	Overdominant	0.185149
rs31364	3	268451	2.19389577551492e-07	SMA25	Overdominant	0.0509397
rs21313	2	674076	2.32536013855674e-07	SMA25	Overdominant	0.0272008
rs101924	7	459691	2.75747343707705e-07	SMA25	Overdominant	0.20396
rs32694	4	35584	2.77837440194127e-07	SMA25	Overdominant	0.133037
rs73814	5	182701	2.97984871813609e-07	SMA25	Overdominant	0.22664
rs20397	2	639700	3.07334830356651e-07	SMA25	Overdominant	0.0927579
rs20401	2	639793	3.07334830356651e-07	SMA25	Overdominant	0.0934394
rs203599	12	1026263	3.12825581523034e-07	SMA25	Overdominant
rs8926	2	183084	3.62000695706592e-07	SMA25	Overdominant	0.176587
rs192256	12	548327	5.83596228312936e-07	SMA25	Overdominant	0.109019
rs192261	12	548551	5.83596228312936e-07	SMA25	Overdominant	0.108911
rs109367	7	754634	6.07164491705024e-07	SMA25	Overdominant	0.234826
rs100384	7	393110	6.26194801232407e-07	SMA25	Overdominant	0.203465
rs103157	7	506941	6.26194801232407e-07	SMA25	Overdominant
rs235893	14	353732	6.3857221121022e-07	SMA25	Overdominant	0.141724
rs276400	16	134038	7.16702490539657e-07	SMA25	Overdominant	0.165678
rs191049	12	498323	1.12582791134308e-06	SMA25	Overdominant	0.223489
rs109074	7	743797	1.16103177927991e-06	SMA25	Overdominant	0.158416
rs156672	10	580738	1.29669681851729e-06	SMA25	Overdominant	0.102475
rs107316	7	671997	1.33225094165956e-06	SMA25	Overdominant	0.0835806
rs228371	14	40852	1.42952798061615e-06	SMA25	Overdominant	0.228218
rs173001	11	444257	1.56606096811387e-06	SMA25	Overdominant	0.0924827
rs58900	4	1067525	1.74255649178144e-06	SMA25	Overdominant	0.0697329
rs279065	16	233462	2.07572165328902e-06	SMA25	Overdominant	0.149653
rs131891	9	67540	2.3011867142886e-06	SMA25	Overdominant	0.118812
rs11887	2	315206	2.32439858973767e-06	SMA25	Overdominant	0.214851
rs260571	15	554117	2.52226790189646e-06	SMA25	Overdominant	0.0882061
rs270061	15	924397	2.60378104265791e-06	SMA25	Overdominant	0.184836
rs106320	7	640411	2.71404526455009e-06	SMA25	Overdominant	0.247525
rs153642	10	449051	3.45472791963439e-06	SMA25	Overdominant
rs207613	13	119408	4.32406561931155e-06	SMA25	Overdominant	0.258672
rs56203	4	949675	4.58367436097507e-06	SMA25	Overdominant	0.0499505
rs267151	15	810945	4.78100263560498e-06	SMA25	Overdominant	0.112871
rs252716	15	274207	4.79434762528794e-06	SMA25	Overdominant	0.0549505
rs140247	9	387808	4.93243640393145e-06	SMA25	Overdominant	0.137412
rs34717	4	101117	4.98579622417593e-06	SMA25	Overdominant
rs11378	2	298966	5.83107741589757e-06	SMA25	Overdominant	0.051142
rs174174	11	490325	7.31880780923781e-06	SMA25	Overdominant	0.1005
rs128358	8	423850	7.90206537926148e-06	SMA25	Overdominant	0.016815
rs82979	5	552899	8.62400870132097e-06	SMA25	Overdominant	0.202488
rs140155	9	386312	8.77003870585872e-06	SMA25	Overdominant	0.114141
rs161730	11	37242	9.03620139619508e-06	SMA25	Overdominant	0.275025
rs202044	12	957451	9.34721138808187e-06	SMA25	Overdominant	0.12364
rs11871	2	314492	1.05504239688297e-05	SMA25	Overdominant	0.216123
rs181103	12	100410	1.09207899495681e-05	SMA25	Overdominant	0.214851
rs120192	8	96527	1.09228274864812e-05	SMA25	Overdominant	0.294732
rs116503	7	1018177	1.12793017930519e-05	SMA25	Overdominant	0.0945545
rs153655	10	449520	1.14821839536862e-05	SMA25	Overdominant	0.229931
rs84108	6	41068	1.17170663323728e-05	SMA25	Overdominant	0.184341
rs212697	13	332483	1.20402575654945e-05	SMA25	Overdominant
rs163864	11	111586	1.28926235230002e-05	SMA25	Overdominant
rs194523	12	650779	1.33953934682811e-05	SMA25	Overdominant	0.0634291
rs132003	9	70523	1.36132807734438e-05	SMA25	Overdominant
rs229333	14	79961	1.39813703554412e-05	SMA25	Overdominant	0.149505
rs290069	16	695621	1.50551895820744e-05	SMA25	Overdominant
rs174315	11	495546	1.51957714766152e-05	SMA25	Overdominant	0.175099
rs69247	4	1505397	1.58843561602333e-05	SMA25	Overdominant	0.264529
rs268688	15	872742	1.7397133724192e-05	SMA25	Overdominant	0.311386
rs92120	7	79021	1.87128631435315e-05	SMA25	Overdominant	0.0465465
rs211741	13	296288	1.87877013263006e-05	SMA25	Overdominant	0.305748
rs68564	4	1468839	1.88291528961325e-05	SMA25	Overdominant	0.126858
rs13306	2	366047	1.94506812706319e-05	SMA25	Overdominant	0.168317
rs208691	13	162015	2.12028044567176e-05	SMA25	Overdominant
rs99361	7	355865	2.23591096246063e-05	SMA25	Overdominant	0.17443
rs35000	4	111432	2.27406569593633e-05	SMA25	Overdominant	0.11276
rs131076	9	31244	8.32934957777165e-11	SMA5	Overdominant	0.0061287
rs280593	16	296420	5.97071818868613e-10	SMA5	Overdominant	0.183168
rs134907	9	178111	6.06133331340667e-10	SMA5	Overdominant	0.100099
rs245646	14	751985	1.11695249846379e-09	SMA5	Overdominant	0.0222222
rs46734	4	561050	2.30710627857388e-09	SMA5	Overdominant	0.0268763
rs239	1	32776	5.6539067674054e-08	SMA5	Overdominant	0.26321
rs212326	13	319027	1.80298445776134e-07	SMA5	Overdominant	0.169483
rs277007	16	161945	3.47746604349815e-07	SMA5	Overdominant	0.163366
rs277012	16	162203	3.47746604349815e-07	SMA5	Overdominant	0.155412
rs276400	16	134038	4.34830219368872e-07	SMA5	Overdominant	0.165678
rs280944	16	312405	1.19279852669779e-06	SMA5	Overdominant	0.170466
rs3456	1	144077	2.20331907224644e-06	SMA5	Overdominant
rs148317	10	248754	2.36514801575782e-06	SMA5	Overdominant	0.0747525
rs147481	10	219575	2.36514801575782e-06	SMA5	Overdominant
rs95599	7	209279	2.43945278941635e-06	SMA5	Overdominant	0.20396
rs58900	4	1067525	4.10203963093088e-06	SMA5	Overdominant	0.0697329
rs233903	14	274379	4.52286885486608e-06	SMA5	Overdominant	0.152131
rs23889	2	766176	5.25335561227254e-06	SMA5	Overdominant	0.111386
rs252716	15	274207	5.39116205467111e-06	SMA5	Overdominant	0.0549505
rs56203	4	949675	5.90892095024836e-06	SMA5	Overdominant	0.0499505
rs176406	11	574216	9.00287231555734e-06	SMA5	Overdominant	0.0385757
rs161694	11	35593	9.00287231555734e-06	SMA5	Overdominant	0.214851
rs141084	9	408854	9.87056038904407e-06	SMA5	Overdominant	0.181188
rs286655	16	558141	1.09253395575349e-05	SMA5	Overdominant	0.078869
rs187030	12	316725	1.37318963104261e-05	SMA5	Overdominant	0.0707221
rs68643	4	1471529	1.40425544993564e-05	SMA5	Overdominant	0.11276
rs182864	12	159822	1.43382929885829e-05	SMA5	Overdominant	0.0569307
rs100384	7	393110	1.63929739276929e-05	SMA5	Overdominant	0.203465
rs103157	7	506941	1.63929739276929e-05	SMA5	Overdominant
