# Supplementary material for: Extensive impact of low-frequency variants on the phenotypic landscape at population-scale
Source: eLife. 2019 Oct 24;8:e49258. doi: 10.7554/eLife.49258 (PMC6892612; doi:10.7554/eLife.49258)
Supplement: Supplementary file 1. [file elife-49258-supp1.xlsx]

## Sheet: Table S1
Strain_Name	Isolation	Eco_Origin	Class	Geo_Origin	Continent	GWAS included
CLIB382_1b	Beer	Beer	Domesticated	Ireland	Europe	Yes
YJM326_b	Human, clinical	Human, clinical	Clinical	California, USA	North America	Yes
YJM421_b	Ascites fluid	Human, clinical	Clinical	USA	North America	Yes
YJM434_1b	Human, clinical	Human, clinical	Clinical	NA	NA
CECT10109_1b	Prickly pear	Fruit	Wild	Spain	Europe	Yes
DBVPG3591_1b	Cocoa beans	Nature	Wild	NA	NA	Yes
L-1374	Wine	Wine	Wild	Chile	South America
CLIB413_1b	Fermenting rice beverage	Fermentation	Domesticated	China	Asia	Yes
Y12_1b	Palm wine	Palm wine	Domesticated	Ivory Coast	Africa	Yes
CLIB154_1b	Wine	Wine	Domesticated	Russia	Europe
I14_1b	Vineyard soil	Wine	Domesticated	Italy	Europe	Yes
UC8_1b	Wine	Wine	Domesticated	South Africa	Africa
WE372_1b	Wine	Wine	Domesticated	South Africa	Africa
NC_02_b	Exudate from Quercus sp.	Tree	Wild	North Carolina, USA	North America	Yes
T7_b	Exudate from Quercus sp.	Tree	Wild	Babler State Park, MO, USA	North America
NPA03.1	Palm wine	Palm wine	Domesticated	Nigeria	Africa	Yes
CLQCA_04-021	Beetle	Insect	Wild	Los Rios, Ecuador	South America	Yes
CLQCA_10-027	Grass	Nature	Wild	Pichincha, Ecuador	South America
ES4M07	Fruiting body of Geastrum sp.	Fruit	Wild	Dongpu, Sinyi Township, Nantou, Taiwan	Asia	Yes
YPS133	Soil beneath Quercus alba	Soil	Wild	Pennsylvania, USA	North America
YPS141	Soil beneath Quercus velutina	Soil	Wild	Pennsylvania, USA	North America
YPS142	Surface of Tuber magnatum	Nature	Wild	Pennsylvania, USA	North America
YPS143	Banana wine	Wine	Domesticated	Pennsylvania, USA	North America	Yes
YJM627	Seg. Y55	NA	NA	France	Europe	Yes
YPS163	Soil beneath Quercus rubra	Soil	Wild	Pennsylvanian	North America	Yes
BJ20	Bark from Quercus wutaishanica	Tree	Wild	Dongling Mountain, Beijing, China	Asia	Yes
HN10	Rotten wood	Nature	Wild	Wuzhi Mountain, Hainan province, China	Asia	Yes
HN15	Rotten wood	Nature	Wild	Wuzhi Mountain, Hainan province, China	Asia	Yes
HN16	Soil	Soil	Wild	Wuzhi Mountain, Hainan province, China	Asia	Yes
2162	Forest soil, 30C	Soil	Wild	Hungary	Europe
2187	Forest soil, 30C	Soil	Wild	Hungary	Europe	Yes
EXF-5247	Seawater in harbour	Water	Wild	Koper, Slovenia	Europe	Yes
EXF-5248	Seawater in harbour	Water	Wild	Koper, Slovenia	Europe	Yes
EXF-5295	Kefyr	Fermentation	Domesticated	Slovenia	Europe
EXF-5297	Mashed pears	Fruit	Wild	Slovenia	Europe
EXF-7197	Quercus sp.	Tree	Wild	Montenegro	Europe	Yes
CLIB485	Cider brewery, industrial raw juice	Cider	Domesticated	Brittany, France	Europe
CLIB1071	Cider brewery, dry cider	Cider	Domesticated	Lower Normandy, France	Europe	Yes
CLIB1410	Rice wine, Oenology	Fermentation	Domesticated	Laos	Asia
DBVPG1058	Baker's yeast	Bakery	Domesticated	Pazzaglia, Italy	Europe
DBVPG1564	Grape must	Wine	Domesticated	Dolianova, Sardinia, Italy	Europe	Yes
YJM990	Clinical	Human, clinical	Clinical	USA	North America
DBVPG2088	Cognac	Distillery	Domesticated	Cognac, France	Europe
ZP_611	Quercus robur	Tree	Wild	Canada, Vancouver,	North America	Yes
CLQCA_20-184	Flower from Heliconia sp.	Flower	Wild	Yasuni, Orellana	South America	Yes
CLQCA_20-246	Termite mound	Insect	Wild	Yasuni, Orellana	South America	Yes
CLQCA_20-259	Decaying fruit	Fruit	Wild	Yasuni, Orellana	South America
UCD_05-780	Beetle	Insect	Wild	Winters, CA Wolfskill USDA Prunus germplasm collection,	North America
UCD_09-448	Olives	Fruit	Wild	Davis, CA, UCD	North America	Yes
sample 40	Tree leaves	Tree	Wild	Bordeaux, France	Europe	Yes
YPS615	Quercus sp.	Tree	Wild	Pennsylvania, USA	North America
YPS617	Quercus sp.	Tree	Wild	Pennsylvania, USA	North America	Yes
1560	Manzanilla-Alorena, olive (Noe)	Nature	Wild	Aceituna, Spain	Europe	Yes
∑1278b	NA	Laboratory	Domesticated	NA	NA	Yes
FY4	NA	Laboratory	Domesticated	NA	NA	Yes
