# Supplementary material for: Extensive impact of low-frequency variants on the phenotypic landscape at population-scale
Source: eLife. 2019 Oct 24;8:e49258. doi: 10.7554/eLife.49258 (PMC6892612; doi:10.7554/eLife.49258)
Supplement: Supplementary file 2. [file elife-49258-supp2.xlsx]

## Sheet: Table S2
Categories	Sub-categories	Conditions
Reference		SC
Cell wall	Membrane stability	SC SDS 0.01%
		SC SDS 0.025%
		SC SDS 0.05%
	Ergosterol synthesis	SC fluconazole 1µg/ml (triazole)
		SC fluconazole 5µg/ml (triazole)
		SC fluconazole 10µg/ml (triazole)
	Erg synthesis + multiple targets	SC ketoconazole 10µg/ml (imidazole)
		SC ketoconazole 30µg/ml (imidazole)
		SC ketoconazole 60µg/ml (imidazole)
Cold		SC 14°C
DNA metabolism	Telomere dynamics	SC sodium (meta)arsenite 1mM (SMA)
		SC sodium (meta)arsenite 2.5mM (SMA)
		SC sodium (meta)arsenite 5mM (SMA)
	DNA damage	SC 4-NQO 1µg/ml
		SC 4-NQO 2µg/ml
		SC 4-NQO 3µg/ml
	DNA synthesis	SC 5-FU 50µg/ml (pyrimidine analog)
		SC 5-FU 100µg/ml (pyrimidine analog)
		SC 5-FU 250µg/ml (pyrimidine analog)
General cellular damage		SC CuSO4 0.1mM
		SC CuSO4 0.5mM
		SC CuSO4 1mM
Metabolism	Carbon sources utilization	SC galactose 2%
		SC glycerol 2%
	Carbon starvation	SC glucose 0.01%
		SC galactose 0.01%
		SC glycerol 0.01%
	High carbon source tolerance	SC glucose 10%
		SC galactose 10%
		SC glycerol 10%
Osmotic stress		SC NaCl 0.5M
		SC NaCl 1M
Oxydative stress		SC methyl viologen 0.5mM
		SC methyl viologen 1mM
		SC methyl viologen 2.5mM
Protein stability		SC formamide 1%
		SC formamide 2%
		SC formamide 5%
Signal transduction pathways		SC caffeine 10 mM
		SC caffeine 20 mM
		SC caffeine 40 mM
Subcellular organisation	Microtubules function	SC benomyl 50µg/ml
		SC benomyl 100µg/ml
Translation	Ribosomes function	SC cycloheximide 0.1µg/ml
		SC cycloheximide 0.25µg/ml
		SC cycloheximide 0.5µg/ml
Transcription	GTP and UTP nucleotide pools	SC 6-azauracil 50µg/ml
		SC 6-azauracil 100µg/ml
		SC 6-azauracil 200µg/ml
