# Supplementary figures and images for: Extensive impact of low-frequency variants on the phenotypic landscape at population-scale
Source: eLife journal article supplement (doi:10.7554/elife.49258), 2019-10-24

Figure 4-figure supplement 1

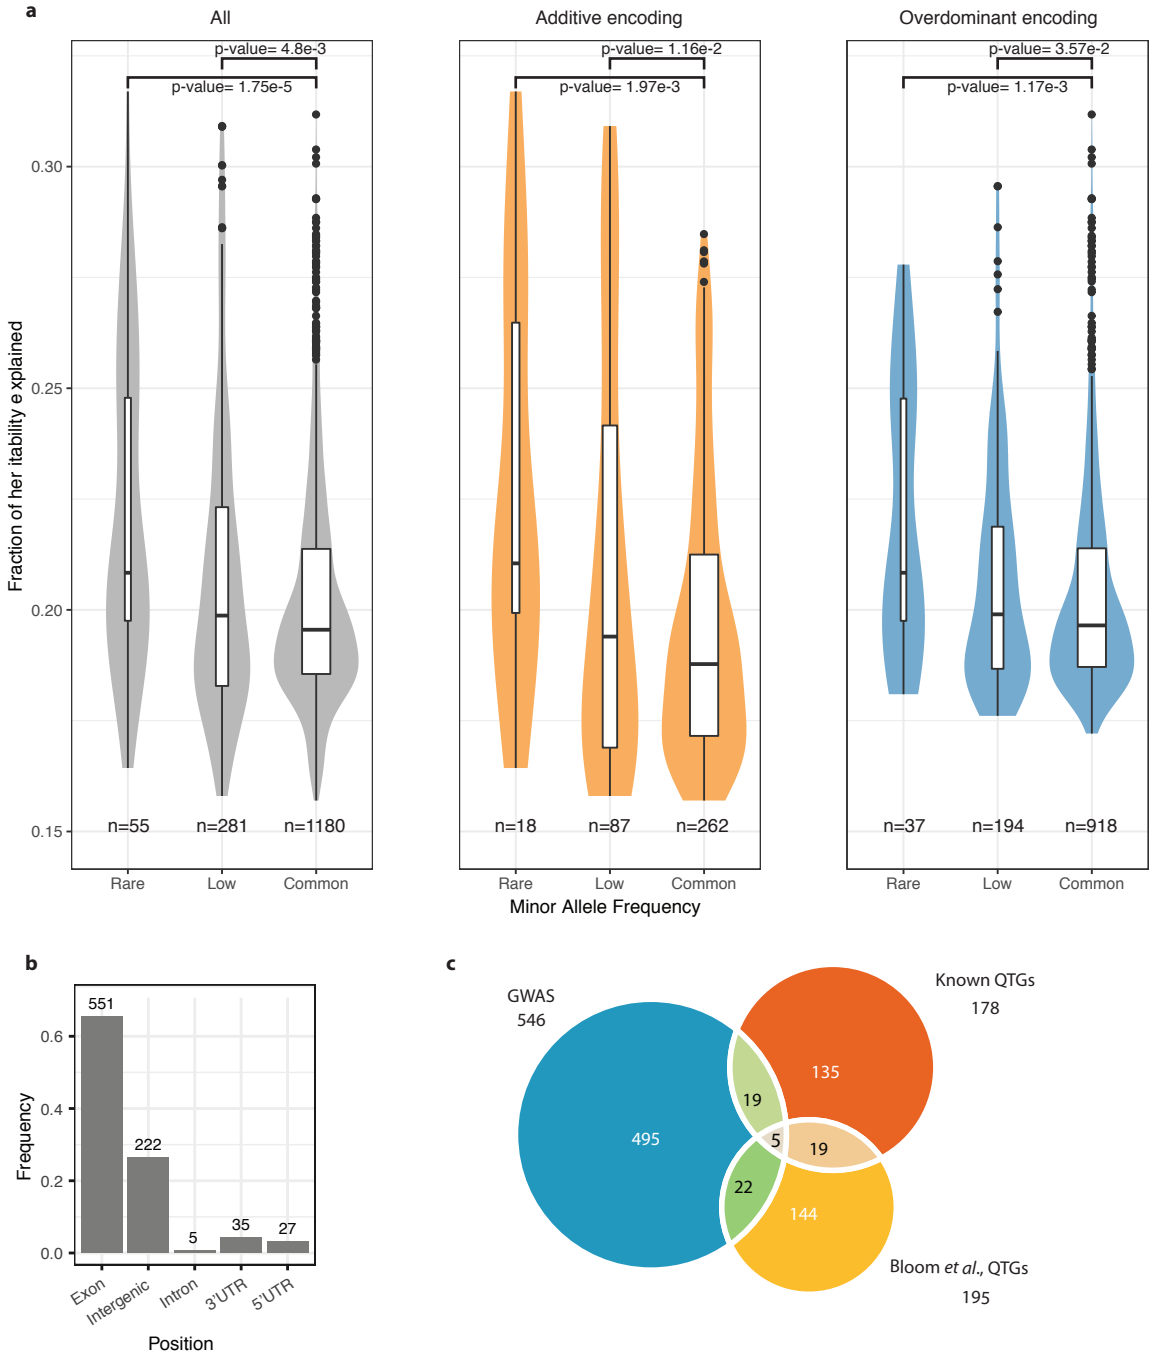

Supplement: supp [file elife-49258-supp-v1.zip]

Figure 1-figure supplement 3

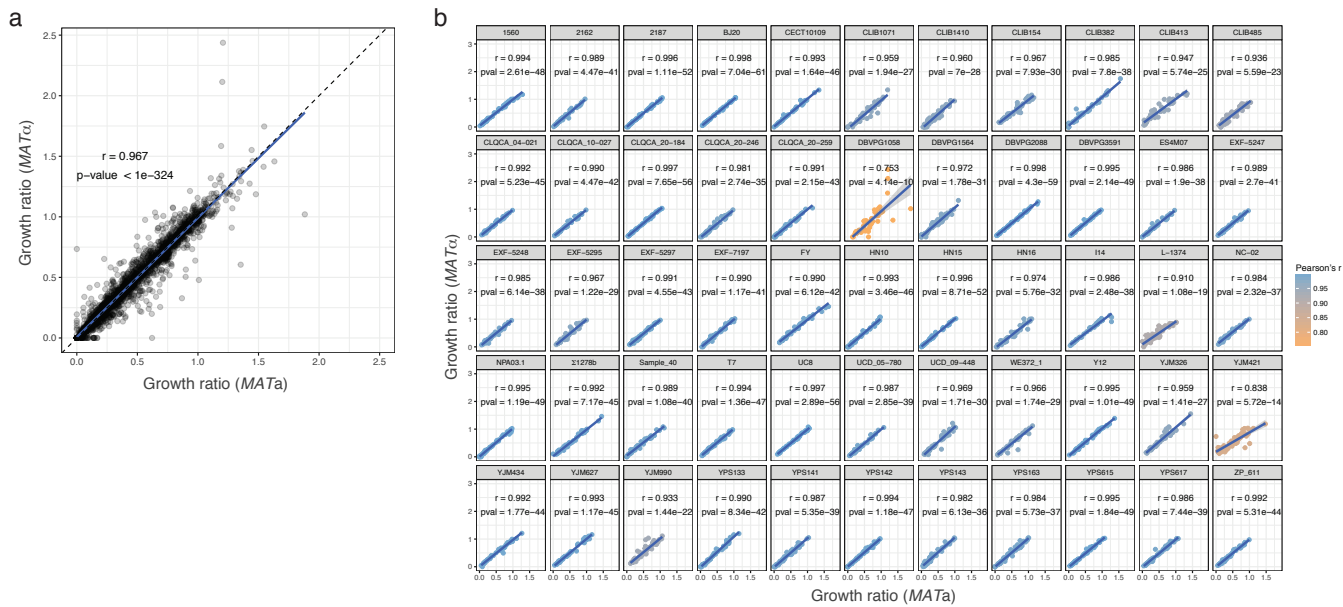

Supplement: supp [file elife-49258-supp-v1.zip]

Figure 1-figure supplement 2

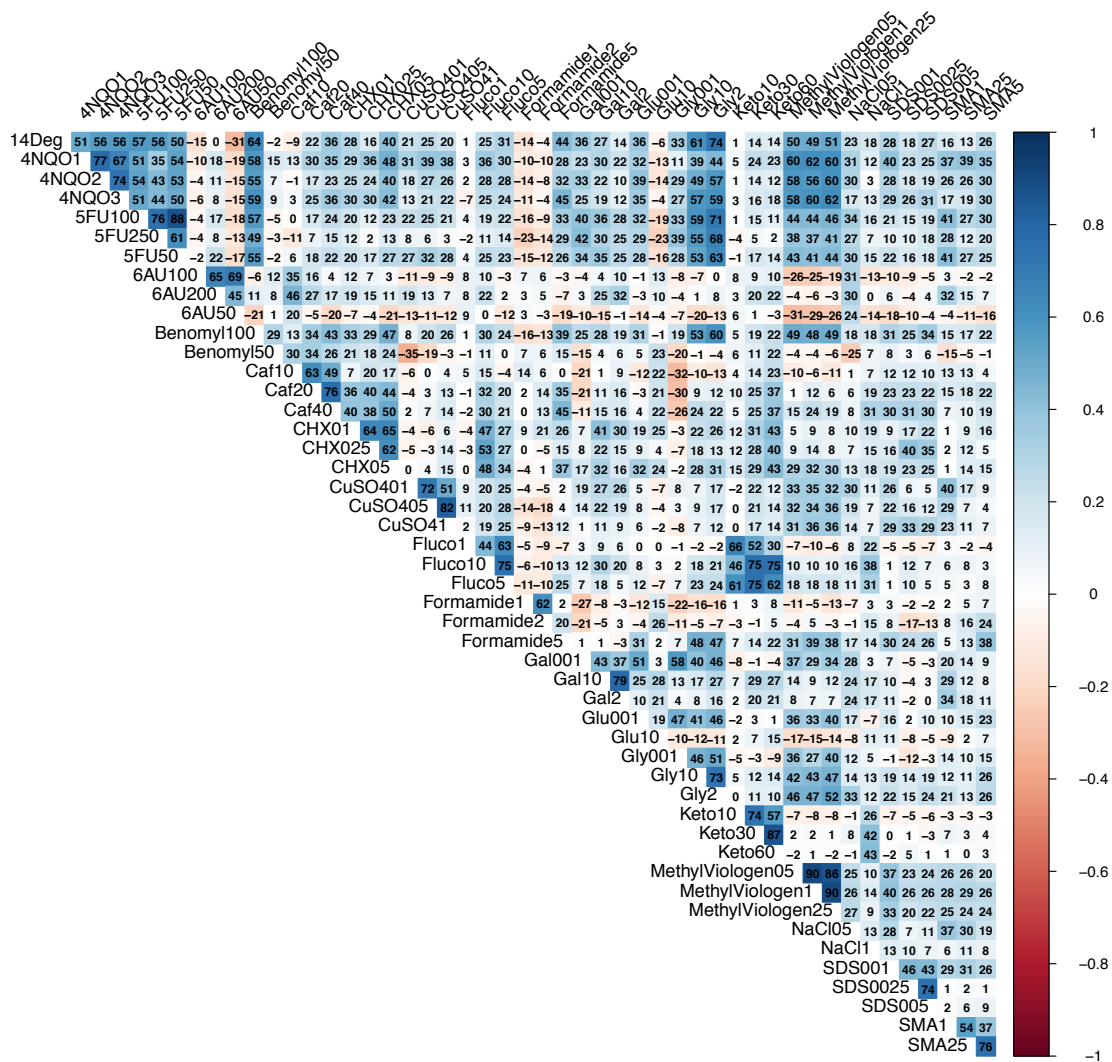

Supplement: supp [file elife-49258-supp-v1.zip]

Figure 1-figure supplement 1

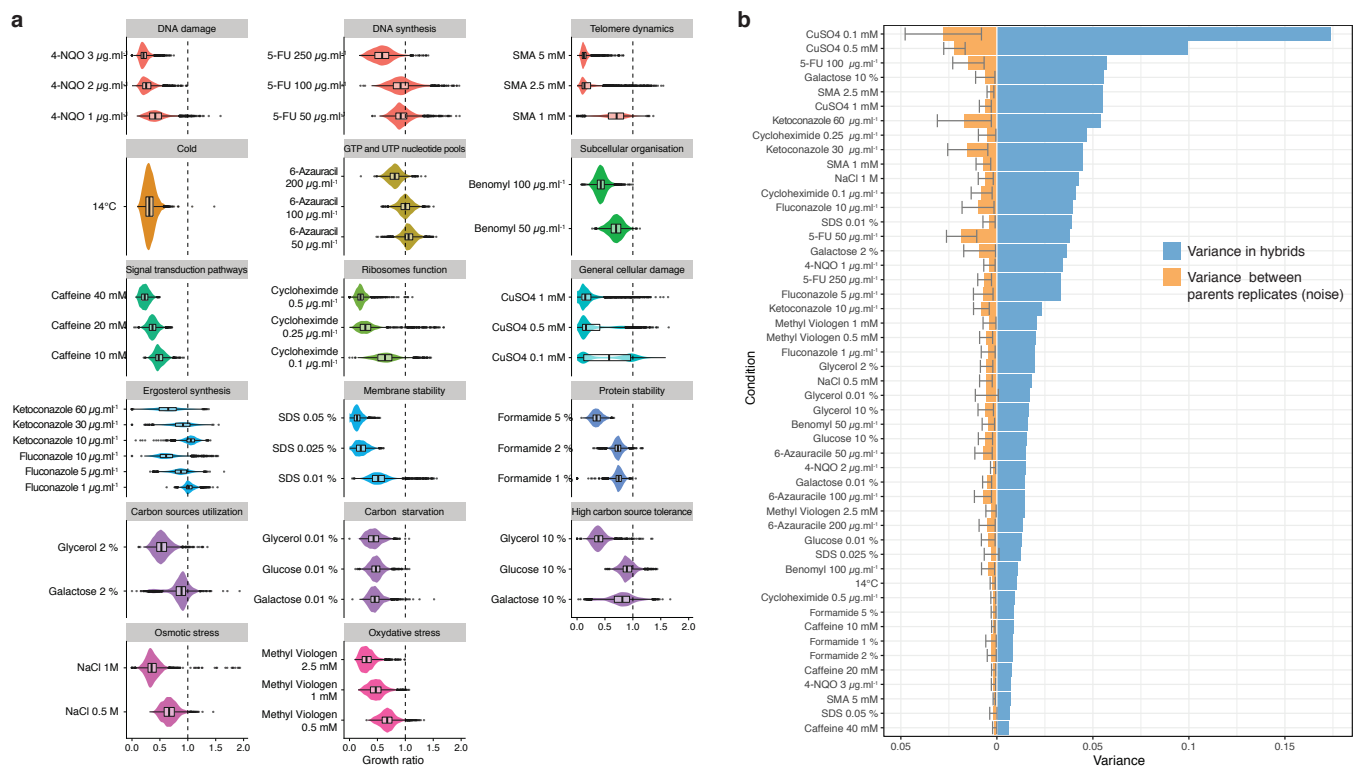

Supplement: supp [file elife-49258-supp-v1.zip]
